# Supplementary material for: Multi-heteroatom doped nanographenes: enhancing photosensitization capacity by forming an electron donor–acceptor architecture
Source: Royal Society of Chemistry journal article supplement (doi:10.1039/d4sc02416h), 2024-01-01
Supplement: d4sc02416h1.pdf [file d4sc02416h1.pdf]

Supplementary Information for

**Multi-Heteroatom Doped Nanographenes: Enhancing Photosensitization Capacity by Forming an Electron Donor-Acceptor Architecture**

Ranran Li<sup>†</sup>, Bin Ma<sup>†</sup>, Meng Li, Dan Wang, Peng Liu, and Peng An<sup>\*</sup>

School of Chemical Science and Technology, Yunnan University, Kunming 650500, P. R. China.

**Table of Contents**

|                                                                                                                                                |     |
|------------------------------------------------------------------------------------------------------------------------------------------------|-----|
| <b>General Information and methods</b> .....                                                                                                   | S2  |
| <b>Synthesis</b> .....                                                                                                                         | S2  |
| Scheme S1. Synthesis of Nanographenes <b>1</b> , <b>2</b> , and <b>1-Me<sup>+</sup></b> .....                                                  | S5  |
| Scheme S2. Synthesis of Nanographenes <b>3</b> and <b>4</b> .....                                                                              | S7  |
| <b>Supplementary Figures and Tables</b>                                                                                                        |     |
| Figure S1. 2D spectra of compound <b>3</b> .....                                                                                               | S10 |
| Figure S2. 2D spectrum of compound <b>1-Me<sup>+</sup></b> .....                                                                               | S11 |
| Figure S3. X-ray crystallography of compound <b>1</b> , <b>2</b> , and <b>4</b> .....                                                          | S12 |
| Table S1. Details of the crystal structure analyses of compounds <b>1</b> , <b>2</b> , and <b>4</b> .....                                      | S13 |
| Table S2 Photophysical properties of compounds <b>1-4</b> and <b>1-Me<sup>+</sup></b> .....                                                    | S14 |
| Figure S4. Calculated 3D ICSS map of compounds <b>1-4</b> and <b>1-Me<sup>+</sup></b> .....                                                    | S14 |
| Figure S5. UV/Vis absorption of <b>1-Me<sup>+</sup></b> in different solvents.....                                                             | S15 |
| Figure S6. Solid-state fluorescence emission spectra of amorphous solids <b>1-4</b> .....                                                      | S15 |
| Figure S7. Calculated molecular orbitals with major transitions of compounds <b>1-4</b> and <b>1-Me<sup>+</sup></b><br>.....                   | S16 |
| Figure S8–S12. Emission spectra of compounds <b>1-4</b> and <b>1-Me<sup>+</sup></b> in different solvents and their<br>normalized spectra..... | S16 |
| Figure S13. Solvatochromism experiment of <i>seco</i> -HBCS and <i>seco</i> -HBCS .....                                                        | S18 |
| Figure S14-S17. Changes in UV-Vis and fluorescence spectra of compounds <b>1-4</b> on addition<br>of trifluoroacetic acid .....                | S18 |
| Figure S18. Cyclic voltammograms measurements .....                                                                                            | S20 |
| Table S3-S7. Major transitions of compounds <b>1-4</b> and <b>1-Me<sup>+</sup></b> calculated by TD-DFT .....                                  | S21 |
| Figure S19. Phosphorescence spectra collected at 77 K in toluene.....                                                                          | S26 |
| Figure S20. ROS Study by DCFH-DA <i>in vitro</i> upon yellow LED light .....                                                                   | S26 |
| Figure S21. ROS Study by DCFH-DA <i>in vitro</i> upon 630 nm laser .....                                                                       | S28 |
| Figure S22. Detection of <sup>1</sup> O <sub>2</sub> by DPBF <i>in vitro</i> upon yellow LED light.....                                        | S29 |
| Figure S23. Cell viability detected by MTT upon yellow LED light irradiation .....                                                             | S31 |
| Figure S24. Hela cell morphological changes upon yellow LED light irradiation.....                                                             | S32 |
| Figure S25. Live/dead cell double staining .....                                                                                               | S33 |
| <b>References</b> .....                                                                                                                        | S34 |
| <b>NMR Spectra</b> .....                                                                                                                       | S35 |
| Table S8–S14. Energies and atomic coordinates for the DFT calculated structures <b>1-4</b> , and <b>1-Me<sup>+</sup></b><br>.....              | S47 |

## General Information

Solvents and chemicals were purchased from commercial sources and used directly without further purification. Molecular sieves were activated in an oven and solvents for reactions were stored with molecular sieves. Petroleum ether (PE) used had a boiling range of 60–90 °C. Reactions were monitored by TLC on silica gel GF 254 plates. Column chromatography was generally performed through silica gel (200–300 mesh). All reactions were run open to air unless specifically described. NMR spectra were recorded with Bruker-400, 500 or 600 MHz spectrometers. Unless specified otherwise, the NMR spectra were recorded at 22 °C; Chemical shifts were reported in parts per million (ppm). Chemical shifts were reported in ppm using TMS or deuterated solvents as internal standards standards (<sup>1</sup>H NMR: CDCl<sub>3</sub>, δ 7.26; DMSO-d<sub>6</sub> δ 2.5; MeOD δ 3.31; for <sup>13</sup>C NMR: CDCl<sub>3</sub>, δ 77.0; DMSO-d<sub>6</sub> δ 39.6; MeOD δ 48.8). Multiplicity was reported as follows: s = singlet, d = doublet, t = triplet, q = quartet, m = multiplet, br = broad. Coupling constants (*J*) are reported in Hertz (Hz). Structural assignments were made with additional information from COSY, ROESY and NOESY experiments. UV-Vis absorption spectra were recorded using a 1-cm quartz cuvette on a Shimadzu-UV-2600 spectrometer. Fluorescence spectra were recorded using a 1-cm quartz cuvette or powder form on a Gangdong F-320 spectrofluorometer at 25 °C. High-resolution mass spectrometry was performed on a Thermo LTQ-Orbitrap XL mass spectrometer equipped with collision cells for collision-induced dissociation or Bruker MALDI-TOF MS RapifleX with DCTB (*trans*-2-[3-(4-*t*-butylphenyl)-2-methyl-2-propenylidene]malononitrile) as the matrix.

## Computational Details

Geometry calculations of nanographenes **HBC-Bu**, **HBC-O**, **1-4**, and **1-Me<sup>+</sup>** were carried out by DFT methods using the Gaussian 16 program package.<sup>[S1]</sup> The optimizations of structures **HBC-Bu**, **HBC-O**, **1-4**, and **1-Me<sup>+</sup>** were carried out at the CAM-B3LYP/6-311+G(d,p)<sup>[S2]</sup> level of theory in the gas phase. The atomic coordinates of the calculated structures and the related energies are shown in Tables S3-S6. The isochemical shielding surface (ICSS) plots, nucleus-independent chemical shift (NICS) calculations, and NMR=GIAO<sup>[S3]</sup> was carried out at the B3LYP/6-311+G(d,p) level of theory. The responding NICS, ICSS, molecular ESP, and valence electron density, are all based on the DFT-optimized structure. Hole-electron analysis was performed by Multiwfn software<sup>[S4]</sup> based on the TD-DFT calculation at CAM-B3LYP/def2-TZVP<sup>[S5]</sup> level using the Gaussian 16 software. IGMH analysis of intermolecular interactions were performed Multiwfn software<sup>[S4]</sup> DFT calculation of crystal structures using Gaussian 16 software at B3LYP-D3(BJ)/6-311+G(d,p) level. Electronic transitions, singlet states, and triplet states energies of nanographenes were calculated by means of TD-DFT methods using the Gaussian 16 software. For the calculations, the PBE0/def2-TZVP<sup>[S5]</sup> theory level was used in gas phase. The output isosurfaces, molecular orbitals, and maps were processed by VMD software<sup>[S6]</sup>.

### **Preparation of nanographene stock solutions.**

Different NG compounds were dissolved in DMSO to make a concentrated solution (10 mM), which is then diluted in cell culture medium or methanol and PBS buffer as needed.

### **ROS Study by DCFH-DA in *vitro*.**

2',7'-Dichlorodihydrofluorescein diacetate (DCFH-DA) was employed for *in vitro* ROS evaluation.<sup>[S7]</sup> The ROS generation produced by different nanographenes could be evaluated by the fluorescence emission of DCF that is converted from DCFH-DA. In detail, 20  $\mu\text{L}$  DCFH-DA in DMSO ( $10 \times 10^{-3}$  M) was added to 800  $\mu\text{L}$  NaOH in PBS ( $10 \times 10^{-3}$  M) and allowed to stay at room temperature for 30 min, followed by addition of 9180  $\mu\text{L}$  PBS buffer to stop the reaction, and kept in dark before use. By the time, DCFH-DA was hydrolyzed to DCFH. Subsequently, the solution of DCFH (600  $\mu\text{L}$ ) was mixed with 2400  $\mu\text{L}$  of compound in methanol and PBS buffer mixed solvents, with the 20  $\mu\text{M}$  final concentration of the compound and the final solvent is methanol and PBS buffer (v:v=1:9). Compound and indicator solution was exposed to yellow LED light ( $0.02 \text{ W/cm}^2$ ) or 630 nm laser ( $0.15 \text{ W/cm}^2$ ), 15 cm distance from the light source, fluorescence intensity of DCF at different times was measured to estimate the ROS production ability of compounds. The fluorescence intensity at 525 nm was recorded to indicate the generation rate of total ROS.

### **Detection of $^1\text{O}_2$ in *vitro*.**

1,3-diphenylisobenzofuran (DPBF) was used as the singlet oxygen probe for *in vitro* singlet oxygen release evaluation. The DPBF was dissolve in DMSO with the concentration of  $10 \times 10^{-3}$  M. The solution of DPBF (24  $\mu\text{L}$ ) was mixed with 2976  $\mu\text{L}$  of compound in the mixed solvent of methanol and PBS buffer, with the final concentration of the compound is 20  $\mu\text{M}$  and the final solvent is methanol and PBS buffer (v/v = 9:1). The absorbance of DPBF after yellow LED light ( $0.02 \text{ W/cm}^2$ ) irradiation at different times was measured to estimate the singlet oxygen release ability.

### **Cell and Culture Conditions.**

Hela cells were purchased from Beyotime Biotech Inc. The cell clones were cultured in DMEM medium supplemented with 10% fetal calf serum (FBS) and 1% Penicillin-Streptomycin solution at 37°C in 95% air with 5%  $\text{CO}_2$ .

### **Cell viability test**

Briefly, Hela cells were seeded on 96 well plates ( $1 \times 10^4$  cells per well) and cultured for 24 h. The old medium was replaced with 100  $\mu\text{L}$  fresh medium containing different concentrations of compounds (0, 2, 5, 10, 15, 20, and 25  $\mu\text{M}$ ) and the cells were further incubated at 37 °C for 12 h. The plates were irradiated under yellow light irradiation ( $0.02 \text{ W/cm}^2$ ) or 630 nm laser ( $0.15 \text{ W/cm}^2$ ) for 30 min or stay in dark as control groups. The cells with or without light

irradiation were cultivated for another 8h. The relative cell viability was measured by MTT assay.

### **Cell morphology imaging**

Hela cells in exponential phase were cultured on 35 mm dishes ( $1 \times 10^5$  cells per well) for 24 hours, the old medium was replaced with 2 mL fresh medium containing NGs **1–4** and **1-Me<sup>+</sup>** (10  $\mu$ M), the cells were further incubated at 37 °C for 12 h. The plates were irradiated with yellow LED light (0.02 W/cm<sup>2</sup>) or 630 nm laser (0.15 W/cm<sup>2</sup>, for **1-Me<sup>+</sup>**) for 15 min and during this the cell images were recorded through a microscope lens.

### **Fluorescence Imaging of Intracellular ROS**

Hela cells in the exponential phase of growth were grown on 35 mm glass-bottom culture dishes ( $1 \times 10^5$  cells per well) for 24 h to reach about 80% confluency. The old medium was replaced with 2 mL fresh medium and the cells were incubated with or without NG **1-Me<sup>+</sup>** (10  $\mu$ M) at 37 °C for 12 h. The cells were washed three times with PBS and further stained with DCFH (10  $\mu$ M) in fresh medium for 30 min, then washed three times with PBS. The fluorescence images were eventually acquired via a confocal laser scanning microscope while the cells were exposed under 630 nm laser (0.02 W/cm<sup>2</sup>). The excitation wavelength is 488 nm for DCF.

### **Co-staining assay by CLSM**

Hela cell in exponential phase were cultured on 35 mm-glass-bottom dishes ( $1 \times 10^5$  cells per well) for 24 hours, the cells achieved around a confluence of 80%, the old medium was replaced with 2 mL fresh medium containing NGs **1–4** and **1-Me<sup>+</sup>** (10  $\mu$ M). After incubated for 12 h was followed the irradiation with yellow LED light (0.02 W/cm<sup>2</sup>) or 630 nm laser (0.15 W/cm<sup>2</sup> for **1-Me<sup>+</sup>**) for 30 min, the cells were further incubated for 4h. The cells were washed for three times with PBS solution (1 mL), stained with Calcein (AM)/propidium iodide (PI) according to Cell Viability/Cytotoxicity Assay Kit Instruction, and then gently washed twice with PBS. The cell apoptosis was visualized by confocal laser scanning microscopy with an excitation wavelength of 494 nm for AM and excitation wavelength of 535 nm for PI.

## Synthesis

### Scheme S1. Synthesis of Nanographenes **1**, **2**, and **1-Me<sup>+</sup>**.

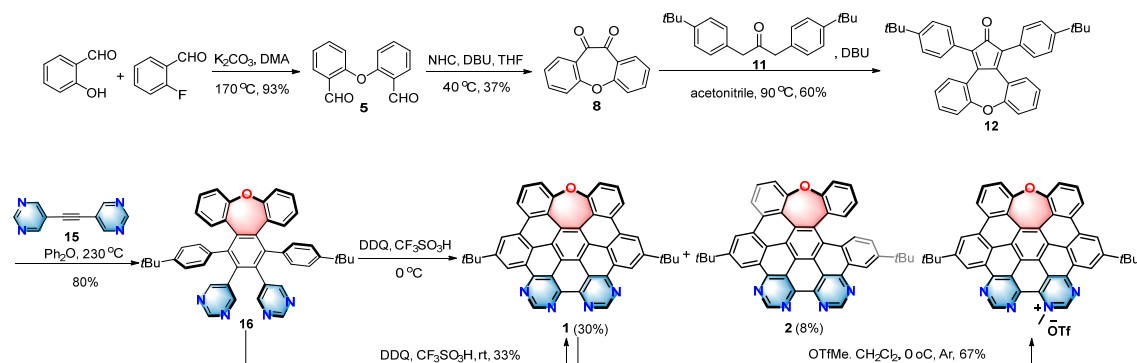

**2,2'-oxydibenzaldehyde (5)** and **dibenzo[b,f]oxepine-10,11-dione (8)**: Compounds **5** and **8** were synthesized by using the reported procedure.<sup>[S8]</sup>

**1,3-bis(4-(tert-butyl)phenyl)-2H-dibenzo[b,f]cyclopenta[d]oxepin-2-one (12)**: A mixture of **11**<sup>[S9]</sup> (155 mg, 0.48 mmol) and dibenzo[b,f]oxepine-10,11-dione **8** (162 mg, 0.70 mmol) in 10 mL acetonitrile was placed in an oil bath at 90 °C for 10 min. DBU (0.07 mL, 0.48 mmol) was added to the refluxing solution and the reaction mixture was refluxed for another 3 hours. Upon complete conversion (checked by TLC), the mixture was cooled to room temperature the resulting dark violet suspension was filtered. The crude product was washed with cold acetonitrile and further purified by column chromatography on silica gel with PE/EA (20/1, v/v) as eluent to give the title product as a violet solid (221 mg, 60%): <sup>1</sup>H NMR (400 MHz, CDCl<sub>3</sub>) δ 7.35–7.26 (m, 14H), 6.93 (td, *J* = 7.5, 1.3 Hz, 2H), 1.32 (s, 18H); <sup>13</sup>C NMR (101 MHz, CDCl<sub>3</sub>) δ 199.9, 157.1, 150.8, 148.5, 132.1, 131.3, 129.6, 128.1, 126.2, 125.3, 125.0, 121.7, 34.6, 31.3; IR (film)  $\tilde{\nu}$  = 3093, 3060, 2967, 2869, 1713, 1511, 1465, 1265, 1093, 1033, 735, 708, 701 cm<sup>-1</sup>; HRMS (ESI) *m/z*: [M+H]<sup>+</sup> Calcd for C<sub>37</sub>H<sub>35</sub>O<sub>2</sub> 511.2632 [M+H]<sup>+</sup>, found 511.2630.

**5,15-bis(4-(tert-butyl)phenyl)dibenzo[2',3':6',7']oxepino[4',5':4,5]benzo[1,2-f]pyrimido[5,4-h]quinazoline (16)**: To a solution of compound **12** (241 mg, 0.47 mmol) in diphenyl ether (2.0 mL at room temperature) was added alkyne **15**<sup>[S9]</sup> (57 mg, 0.30 mmol). The mixture was heated to 230 °C under Ar atmosphere in the sealed tube and kept stirring for 36 hours. Then the reaction was cooled to room temperature and further purified by column chromatography on silica gel with PE/EA (2/1, v/v) as eluent to give the title compound **16** as a white solid (251 mg, 80%): <sup>1</sup>H NMR (400 MHz, CDCl<sub>3</sub>) δ 8.75 (d, *J* = 2.9 Hz, 2H), 8.73 (s, 2H), 7.90 (d, *J* = 2.9 Hz, 2H), 7.23 (dd, *J* = 8.1, 1.2 Hz, 2H), 7.10 – 7.07 (m, 4H), 6.99 (dd, *J* = 8.1, 2.0 Hz, 2H), 6.95 (dd, *J* = 8.2, 2.1 Hz, 2H), 6.81 (dd, *J* = 7.9, 1.6 Hz, 2H), 6.65 (dd, *J* = 8.1, 2.0 Hz, 2H), 6.57 (td, *J* = 7.6, 1.3 Hz, 2H), 1.16 (s, 18H); <sup>13</sup>C NMR (101 MHz, CDCl<sub>3</sub>) δ 162.4, 157.6, 157.5, 156.2, 149.9, 141.8, 137.6, 135.7, 134.9, 134.1, 133.3, 131.9, 130.2, 129.9, 129.0, 125.1, 124.4, 123.4, 119.7, 34.3, 31.1; IR (film)  $\tilde{\nu}$  = 3059, 3023, 2964, 2932, 1578, 1547,

1389, 1263, 1195, 1093, 1041, 1024, 811, 801, 634, 600  $\text{cm}^{-1}$ ; HRMS (ESI)  $m/z$ :  $[M+H]^+$  calcd for  $\text{C}_{46}\text{H}_{41}\text{N}_4\text{O}$  665.3275, found 665.3275.

**5,14-di-tert-butyl-19-oxa-7,9,10,12-**

**tetraazabenz[5',6']tetraceno[1',12',11',10':5,6,7,8,9]tetrapheno[10,11,12,1-**

**nopqab]pleiadene (1) and 5,14-di-tert-butyl-21-oxa-7,9,10,12-**

**tetraazadibenzo[fg,ij]benzo[6',7']cyclohepta[1',2',3',4':4,5]phenanthro[9,10,1,2,3-**

**pqrst]pentaphene (2):** To a solution of compound **16** (30 mg, 0.045 mmol) and 2,3-dichloro-

5,6-dicyano-1,4-benzoquinone (DDQ) (103 mg, 0.45 mmol) in 5 mL of anhydrous  $\text{CH}_2\text{Cl}_2$

under an atmosphere of argon cooled in a water-ice bath was added trifluoromethanesulfonic

acid (0.2 mL, 2.5 mmol). The reaction was stirred for 23 minutes under argon atmosphere in

water-ice bath. Then, triethyl amine (2.0 mL, 14.4 mmol) was added into the reaction solution

and the mixture was concentrated under reduced pressure. The residue was purified by column

chromatography on silica gel with DCM/MeOH 40/1 (V/V) as eluent to give the title compound

**1** (9 mg, 30%) as orange solid together with small amount of **2** (2 mg, 8%) as yellow solid.

Notably, when the reaction was set up at room temperature, only structure **1** was detected and

collected with similar yield (10 mg, 33%). Structure **1**: mp: 345–347  $^\circ\text{C}$ ;  $^1\text{H}$  NMR (400

MHz,  $\text{CDCl}_3$ )  $\delta$  9.88 (s, 2H), 9.44 (s, 2H), 8.58 (s, 2H), 8.06 (d,  $J = 7.7$  Hz, 2H), 7.36 (t,  $J = 7.5$

Hz, 2H), 6.79 (d,  $J = 7.1$  Hz, 1H), 1.57 (s, 18H);  $^{13}\text{C}$  NMR (151 MHz,  $\text{CDCl}_3$ )  $\delta$  156.7, 154.6,

151.0, 150.4, 132.1, 129.3, 128.0, 128.0, 125.8, 125.0, 124.6, 123.2, 122.8, 121.9, 119.3, 118.8,

118.5, 117.4, 35.8, 31.7; IR (film)  $\tilde{\nu} = 3118, 3065, 3005, 2969, 2926, 2869, 1562, 1517, 1473,$

1239, 869, 783, 702  $\text{cm}^{-1}$ ; HRMS (ESI)  $m/z$ :  $[M+H]^+$ , calcd for  $\text{C}_{46}\text{H}_{31}\text{N}_4\text{O}$  655.2492, found

655.2496. Structure **2**:  $^1\text{H}$  NMR (400 MHz,  $\text{CDCl}_3$ )  $\delta$  10.12 (s, 1H), 10.11 (s, 1H), 9.78 (s,

1H), 9.51 (s, 1H), 9.07 (s, 1H), 8.61 (s, 1H), 7.83 (m, 2H), 7.70 (d,  $J = 7.2$  Hz, 1H), 7.61 (d,  $J$

$= 8.0$  Hz, 1H), 7.55 (m, 1H), 7.43 (t,  $J = 7.6$  Hz, 1H), 6.88 (t,  $J = 7.6$  Hz, 1H), 6.52 (d,  $J =$

7.6 Hz, 1H), 1.75 (s, 9H), 1.59 (s, 9H).  $^{13}\text{C}$  NMR (151 MHz,  $\text{CDCl}_3$ )  $\delta$  159.0, 158.1, 156.8,

154.9, 154.3, 151.6, 150.9, 135.1, 134.6, 132.9, 131.7, 131.3, 130.3, 130.1, 129.6, 129.2, 128.2,

127.0, 126.7, 125.8, 124.2, 123.7, 123.4, 123.1, 121.9, 121.5, 120.7, 120.5, 120.4, 118.7, 117.9,

35.9, 35.3, 31.8, 31.4; IR (film)  $\tilde{\nu} = 3116, 3036, 2964, 1617, 1547, 1517, 1393, 1264, 1073,$

1035, 807  $\text{cm}^{-1}$ ; HRMS (ESI) calcd for  $\text{C}_{46}\text{H}_{33}\text{N}_4\text{O}$  657.2649  $[M+H]^+$ , found 657.2645.

**5,14-di-tert-butyl-10-methyl-19-oxa-7,9,10,12-**

**tetraazabenz[5',6']tetraceno[1',12',11',10':5,6,7,8,9]tetrapheno[10,11,12,1-**

**nopqab]pleiaden-10-ium, trifluoromethanesulfonate (1-Me<sup>+</sup>):** To a solution of compound **1**

(20 mg, 0.030 mmol) in anhydrous  $\text{CH}_2\text{Cl}_2$  under an atmosphere of argon cooled in a water-

ice bath was added methyl trifluoromethanesulfonate (MeOTf, 6.3  $\mu\text{L}$ , 0.061 mmol). The

reaction was stirred for 2h under argon atmosphere in water-ice bath. Then, the mixture was

concentrated under reduced pressure. The residue was purified by column chromatography on

silica gel with DCM/MeOH 20/1 (V/V) as eluent to give the title compound **1** (14 mg, 67%) as

dark purple solid.  $^1\text{H}$  NMR (600 MHz,  $\text{DMSO-d}_6$  and  $\text{CD}_3\text{OD}$  with trace  $\text{CDCl}_3$ )  $\delta$  10.35 (s, 1H),

9.98 (s, 1H), 9.36 (s, 1H), 9.30 (s, 1H), 9.04 (s, 1H), 8.93 (s, 1H), 8.66 (m, 2H), 7.85 (d,  $J = 8.8$

Hz, 2H), 7.45 (m, 2H), 5.08 (s, 3H), 1.64 (s, 9H), 1.57 (s, 9H).  $^{13}\text{C}$  NMR (151 MHz, DMSO- $d_6$  and  $\text{CD}_3\text{OD}$  with trace  $\text{CDCl}_3$ )  $\delta$  157.7, 157.2, 156.0, 155.7, 155.4, 154.2, 152.6, 152.4, 131.5, 131.0, 128.4, 128.3, 127.7, 126.8, 126.4, 125.9, 125.3, 125.1, 124.1, 123.2, 122.8, 122.1, 121.0, 120.7, 120.1, 120.0, 119.9, 118.7, 116.9, 114.7, 36.0, 31.6, 31.4; HRMS (MALDI-TOF) calcd for  $\text{C}_{47}\text{H}_{33}\text{N}_4\text{O}$  669.2649  $[\text{M}^+]$ , found 669.2655.

Scheme S2. Synthesis of Helical Nanographenes **3** and **4**.

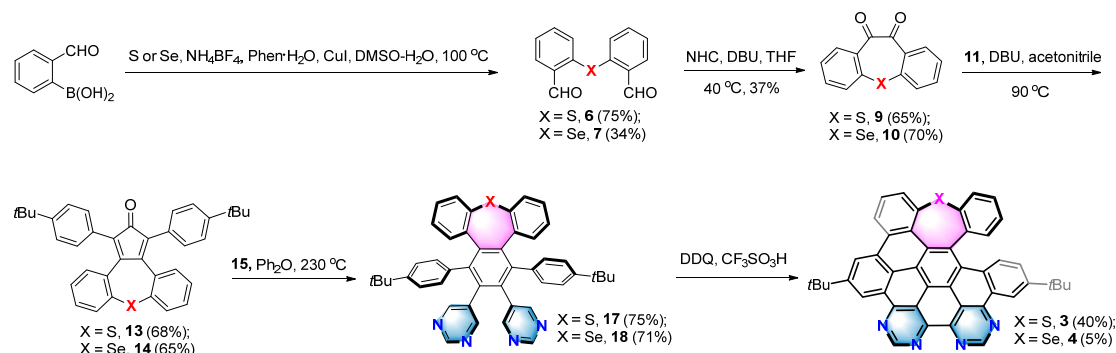

**2,2'-thiodibenzaldehyde (6)** and **2,2'-selenodibenzaldehyde (7)**: Dialdehyde compounds **6** and **7** were synthesized by using the reported procedure.<sup>[S10]</sup>

**Dibenzo[b,f]thiepine-10,11-dione (9)**: Dione **9** was synthesized by using the reported procedure.<sup>[S8]</sup>

**Dibenzo[b,f]selenepine-10,11-dione (10)**: 2-((3-formylphenyl)selanyl)benzaldehyde **7** (300 mg, 1.03 mmol) and 3-Benzyl-5-(2-hydroxyethyl)-4-methylthiazol-3-ium chloride **NHC** (56 mg, 0.2 mmol) were taken in a clean and dried two necked round bottom flask. It was evacuated and back filled with argon gas (2–3 cycles). Then dry THF were added (10 mL) to the above mixture by syringe followed by the dropwise addition of DBU (0.18 mL, 1.24 mmol) under a positive pressure of argon. Then the reaction mixture was heated to 40 °C and kept stirring for 1 hour. Then the argon protection was removed and the reaction mixture was stirred at the room temperature for another 2 hours. The water (20 mL) was added to the reaction mixture and the mixture was extracted with EtOAc (3×15 mL). The combined organic extract was washed with brine (10 mL), the organic phase was dried over anhydrous  $\text{Na}_2\text{SO}_4$  and filtered. The filtrate was concentrated under reduced pressure and the crude residue was purified by silica gel column chromatography with PE/EA 5/1 (V/V) as eluent to give title product as a yellow solid (208 mg, 70%):  $^1\text{H}$  NMR (400 MHz,  $\text{CDCl}_3$ )  $\delta$  7.78–7.72 (m, 4H), 7.47–7.40 (m, 4H);  $^{13}\text{C}$  NMR (101 MHz,  $\text{CDCl}_3$ )  $\delta$  191.6, 140.7, 133.4, 132.7, 131.1, 129.4, 129.3; IR (film)  $\tilde{\nu}$  = 3096, 3050, 1678, 1578, 1437, 1263, 1221, 1032, 704  $\text{cm}^{-1}$ ; HRMS (ESI)  $m/z$ :  $[\text{M}+\text{H}]^+$ , calcd for  $\text{C}_{14}\text{H}_9\text{O}_2\text{Se}$  288.9762, found 288.9761.

**1,3-bis(4-(tert-butyl)phenyl)-2H-dibenzo[b,f]cyclopenta[d]thiepin-2-one (13)**: To a mixture of **11** (191 mg, 0.59 mmol) and dibenzo[b,f]thiepine-10,11-dione **9** (214 mg, 0.89 mmol) in acetonitrile (10 mL) at 90 °C in an oil bath was added DBU (0.08 mL, 0.59 mmol).

The reaction mixture was refluxing for around 3 hours until a complete conversion (checked by TLC). Then the mixture was cooled to room temperature and the resulting dark violet suspension was filtered. The filtrate was concentrated and purified by column chromatography on silica gel with PE/EA 20/1 (V/V) as eluent to give the title product as a violet solid (309 mg, 68%):  $^1\text{H}$  NMR (400 MHz,  $\text{CDCl}_3$ )  $\delta$  7.65 (dd,  $J = 7.5, 1.3$  Hz, 2H), 7.26 (d,  $J = 5.3$  Hz, 4H), 7.19–7.12 (m, 8H), 7.06 (td,  $J = 7.5, 1.3$  Hz, 2H), 1.29 (s, 18H);  $^{13}\text{C}$  NMR (101 MHz,  $\text{CDCl}_3$ )  $\delta$  200.7, 152.4, 150.6, 137.3, 135.5, 133.5, 132.1, 129.9, 129.5, 128.9, 127.7, 125.1, 124.4, 34.6, 31.2; IR (film)  $\tilde{\nu} = 3092, 3059, 2967, 2869, 2819, 1713, 1511, 1465, 1362, 1265, 1093, 1033, 736, 708$   $\text{cm}^{-1}$ ; HRMS (ESI)  $m/z$ :  $[\text{M}+\text{H}]^+$ , calcd for  $\text{C}_{37}\text{H}_{35}\text{OS}$  527.2403 found 527.2408.

**1,3-bis(4-(tert-butyl)phenyl)-2H-dibenzo[b,f]cyclopenta[d]selenepin-2-one (14):** To a mixture of **11** (594 mg, 1.84 mmol) and dibenzo[b,f]selenepine -10,11-dione **10** (691 mg, 2.40 mmol) in acetonitrile (10 mL) at 90 °C in an oil bath was added DBU (0.28 mL, 1.84 mmol). The reaction mixture was refluxing for around 3 hours until a complete conversion (checked by TLC). Then the mixture was cooled to room temperature and the resulting dark violet suspension was filtered. The filtrate was concentrated and purified by column chromatography on silica gel with PE/EA 20/1 (V/V) as eluent to give the title product as a violet solid (895 mg, 65%):  $^1\text{H}$  NMR (400 MHz,  $\text{CDCl}_3$ )  $\delta$  7.77 (dd,  $J = 7.5, 1.3$  Hz, 2H), 7.23 (s, 4H), 7.16–7.05 (m, 10H), 1.28 (s, 18H);  $^{13}\text{C}$  NMR (101 MHz,  $\text{CDCl}_3$ )  $\delta$  201.0, 153.5, 150.4, 138.2, 134.9, 132.0, 131.2, 129.9, 129.2, 128.9, 127.7, 125.0, 124.1, 34.6, 31.2; IR (film)  $\tilde{\nu} = 3082, 3037, 2965, 1773, 1692, 1652, 1570, 1520, 1263, 1038, 799, 744, 712$   $\text{cm}^{-1}$ ; HRMS (ESI)  $m/z$ :  $[\text{M}+\text{H}]^+$ , calcd for  $\text{C}_{37}\text{H}_{39}\text{OSe}$  575.1848, found 575.1847.

**5,5'-(1,4-bis(4-(tert-butyl)phenyl)tribenzo[b,d,f]thiopyne-2,3-diyl)dipyrimidine (17):** To a mixture of compound **13** (100 mg, 0.19 mmol) and diphenyl ether (1.0 mL at room temperature) was added alkyne **15** (23 mg, 0.12 mmol). The mixture was heated to 230 °C under Ar atmosphere in the sealed tube and kept stirring for 36 hours. Then the reaction was cooled to room temperature and further purified by column chromatography on silica gel with PE/EA (3/1, v/v) as eluent to give the title compound **17** as a white solid (96 mg, 75%):  $^1\text{H}$  NMR (400 MHz,  $\text{CDCl}_3$ )  $\delta$  8.78 (d,  $J = 2.9$  Hz, 2H), 8.74 (s, 2H), 7.97 (d,  $J = 2.9$  Hz, 2H), 7.54 (dd,  $J = 7.8, 1.3$  Hz, 2H), 7.03 (dd,  $J = 8.1, 2.1$  Hz, 2H), 6.96–6.91 (m, 4H), 6.87–6.83 (m, 4H), 6.67 (td,  $J = 7.6, 1.3$  Hz, 2H), 6.50 (dd,  $J = 8.1, 2.0$  Hz, 2H), 1.12 (s, 18H);  $^{13}\text{C}$  NMR (101 MHz,  $\text{CDCl}_3$ )  $\delta$  157.7, 157.6, 156.2, 149.5, 141.5, 141.3, 139.9, 135.6, 134.1, 133.1, 131.6, 131.5, 130.2, 127.1, 126.7, 124.8, 124.1, 34.2, 31.0; IR (film)  $\tilde{\nu} = 3116, 3037, 2964, 2910, 1617, 1547, 1394, 1265, 1073, 1035, 832, 807, 757, 736$   $\text{cm}^{-1}$ ; HRMS (ESI)  $m/z$ :  $[\text{M}+\text{H}]^+$ , calcd for  $\text{C}_{46}\text{H}_{41}\text{N}_4\text{S}$  681.3046, found 681.3046.

**5,5'-(1,4-bis(4-(tert-butyl)phenyl)tribenzo[b,d,f]selenepine-2,3-diyl)dipyrimidine (18):** To a mixture of compound **13** (342 mg, 0.59 mmol) and diphenyl ether (1.0 mL at room temperature) was added alkyne **15** (90 mg, 0.49 mmol). The mixture was heated to 230 °C under an argon atmosphere in the sealed tube and kept stirring for 36 hours. Then the reaction was cooled to room temperature and further purified by column chromatography on silica gel with PE/EA (3/1, v/v) as eluent to give the title compound **18** as a white solid (307 mg, 71%):  $^1\text{H}$



NMR (400 MHz, CDCl<sub>3</sub>)  $\delta$  8.77 (d,  $J$  = 2.9 Hz, 2H), 8.74 (s, 2H), 7.98 (d,  $J$  = 2.9 Hz, 2H), 7.65 (dd,  $J$  = 8.0, 1.3 Hz, 2H), 7.01 (dd,  $J$  = 8.1, 2.1 Hz, 2H), 6.93 (dd,  $J$  = 8.0, 2.1 Hz, 2H), 6.87 – 6.83 (m, 6H), 6.68 (td,  $J$  = 7.5, 1.3 Hz, 2H), 6.48 (dd,  $J$  = 8.1, 2.0 Hz, 2H), 1.11 (s, 18H); <sup>13</sup>C NMR (101 MHz, CDCl<sub>3</sub>)  $\delta$  157.7, 157.6, 156.2, 149.4, 142.6, 141.1, 140.3, 137.9, 135.5, 134.0, 133.9, 133.1, 132.9, 131.4, 130.1, 126.8, 126.7, 124.7, 124.0, 34.2, 31.0; IR (film)  $\tilde{\nu}$  = 3119, 3047, 2966, 2874, 1549, 1472, 1394, 1265, 1039, 838, 811, 798, 754, 729 cm<sup>-1</sup>; HRMS (ESI)  $m/z$ : [M+H]<sup>+</sup> calcd for C<sub>46</sub>H<sub>41</sub>N<sub>4</sub>Se 729.2491, found 729.2496.

#### **5,14-di-tert-butyl-21-thia-7,9,10,12-**

**tetraazadibenzo[fg,ij]benzo[6',7']cyclohepta[1',2',3',4':4,5]phenanthro[9,10,1,2,3-pqrst]pentaphene (3)**: To a solution of **17** (30 mg, 0.044 mmol) and DDQ (100 mg, 0.44 mmol) in 5 mL of anhydrous CH<sub>2</sub>Cl<sub>2</sub> under an atmosphere of argon in a water-ice bath. To the was slowly added trifluoromethanesulfonic acid (0.2 mL, 2.5 mmol). The reaction mixture was stirred for 30 minutes at room temperature. Then triethyl amine (2.0 mL, 14.4 mmol) was added and the mixture was concentrated under reduced pressure. The residue was purified by column chromatography on silica gel with DCM/MeOH 40/1 (V/V) as eluent to give the title compound **3** as a yellow solid (12 mg, 40%): <sup>1</sup>H NMR (400 MHz, CDCl<sub>3</sub>)  $\delta$  10.15 (s, 1H), 10.08 (s, 1H), 9.78 (s, 1H), 9.59 (s, 1H), 9.08 (s, 1H), 8.78 (d,  $J$  = 7.0 Hz, 1H), 8.05 (d,  $J$  = 7.0 Hz, 1H), 7.88 (d,  $J$  = 8.0 Hz, 1H), 7.75 – 7.69 (m, 2H), 7.57 – 7.55 (m, 1H), 7.36 (t,  $J$  = 7.6 Hz, 1H), 6.91 (t,  $J$  = 7.5 Hz, 1H), 6.16 (d,  $J$  = 7.7 Hz, 1H), 1.74 (s, 9H), 1.57 (s, 9H); <sup>13</sup>C NMR (151 MHz, CDCl<sub>3</sub>)  $\delta$  156.7, 156.5, 155.0, 154.3, 151.3, 151.0, 146.9, 138.2, 138.1, 137.5, 133.4, 133.3, 133.2, 132.0, 131.7, 130.9, 130.3, 129.9, 129.3, 128.9, 128.7, 128.3, 124.6, 124.5, 123.6, 123.3, 122.3, 122.1, 119.2, 118.8, 117.9, 117.5, 35.9, 35.2, 31.8, 31.4; IR (film)  $\tilde{\nu}$  = 3110, 3041, 2968, 2934, 1621, 1552, 1485, 1336, 1262, 1092, 1031, 805, 694 cm<sup>-1</sup>; HRMS (ESI)  $m/z$ : [M+H]<sup>+</sup> calcd for C<sub>46</sub>H<sub>33</sub>N<sub>4</sub>S 673.2420, found 673.2421.

#### **5,14-di-tert-butyl-21-selena-7,9,10,12-**

**tetraazadibenzo[fg,ij]benzo[6',7']cyclohepta[1',2',3',4':4,5]phenanthro[9,10,1,2,3-pqrst]pentaphene (4)** To a solution of **18** (30 mg, 0.041 mmol) and DDQ (93 mg, 0.41 mmol) in 5 mL of anhydrous CH<sub>2</sub>Cl<sub>2</sub> under an atmosphere of argon in a water-ice bath. To the was slowly added trifluoromethanesulfonic acid (0.2 mL, 2.5 mmol). The reaction mixture was stirred for 30 minutes at room temperature. Then triethyl amine (2.0 mL, 14.4 mmol) was added and the mixture was concentrated under reduced pressure. The residue was purified by column chromatography on silica gel with DCM/MeOH 20/1 (V/V) as eluent to give the title compound **4** as an orange solid (1.5 mg, 5%) and compound **19** as dark yellow solid (13 mg, 45%). Compound **4**: <sup>1</sup>H NMR (400 MHz, CDCl<sub>3</sub>)  $\delta$  10.17 (s, 1H), 10.11 (s, 1H), 9.78 (s, 1H), 9.62 (s, 1H), 9.04 (s, 1H), 8.73 (d,  $J$  = 8.0 Hz, 1H), 8.11 (d,  $J$  = 7.2 Hz, 1H), 7.97 (d,  $J$  = 8.0 Hz, 1H), 7.84 (d,  $J$  = 8.7 Hz, 1H), 7.60–7.58 (m, 2H), 7.31 (t,  $J$  = 7.6 Hz, 1H), 6.89 (t,  $J$  = 7.5 Hz, 1H), 6.07 (d,  $J$  = 7.7 Hz, 1H), 1.74 (s, 9H), 1.56 (s, 9H); <sup>13</sup>C NMR (151 MHz, CDCl<sub>3</sub>)  $\delta$  156.7, 156.7, 155.0, 154.3, 151.3, 151.0, 150.9, 147.8, 138.8, 135.1, 134.5, 133.6, 133.1, 133.0, 132.1, 131.9, 130.4, 130.1, 130.0, 129.9, 129.1, 128.8, 128.7, 128.1, 127.4, 124.5, 124.5, 123.3, 123.2, 122.4, 122.1, 119.2, 118.8, 117.9, 117.3, 35.9, 35.2, 31.8, 31.3; IR (film)  $\tilde{\nu}$  = 3238, 2966, 1691, 1645, 1609, 1514, 1263, 1130, 874, 799 cm<sup>-1</sup>; HRMS (ESI)  $m/z$ : [M+H]<sup>+</sup> calcd for C<sub>46</sub>H<sub>33</sub>N<sub>4</sub>Se 721.1865, found 721.1870.

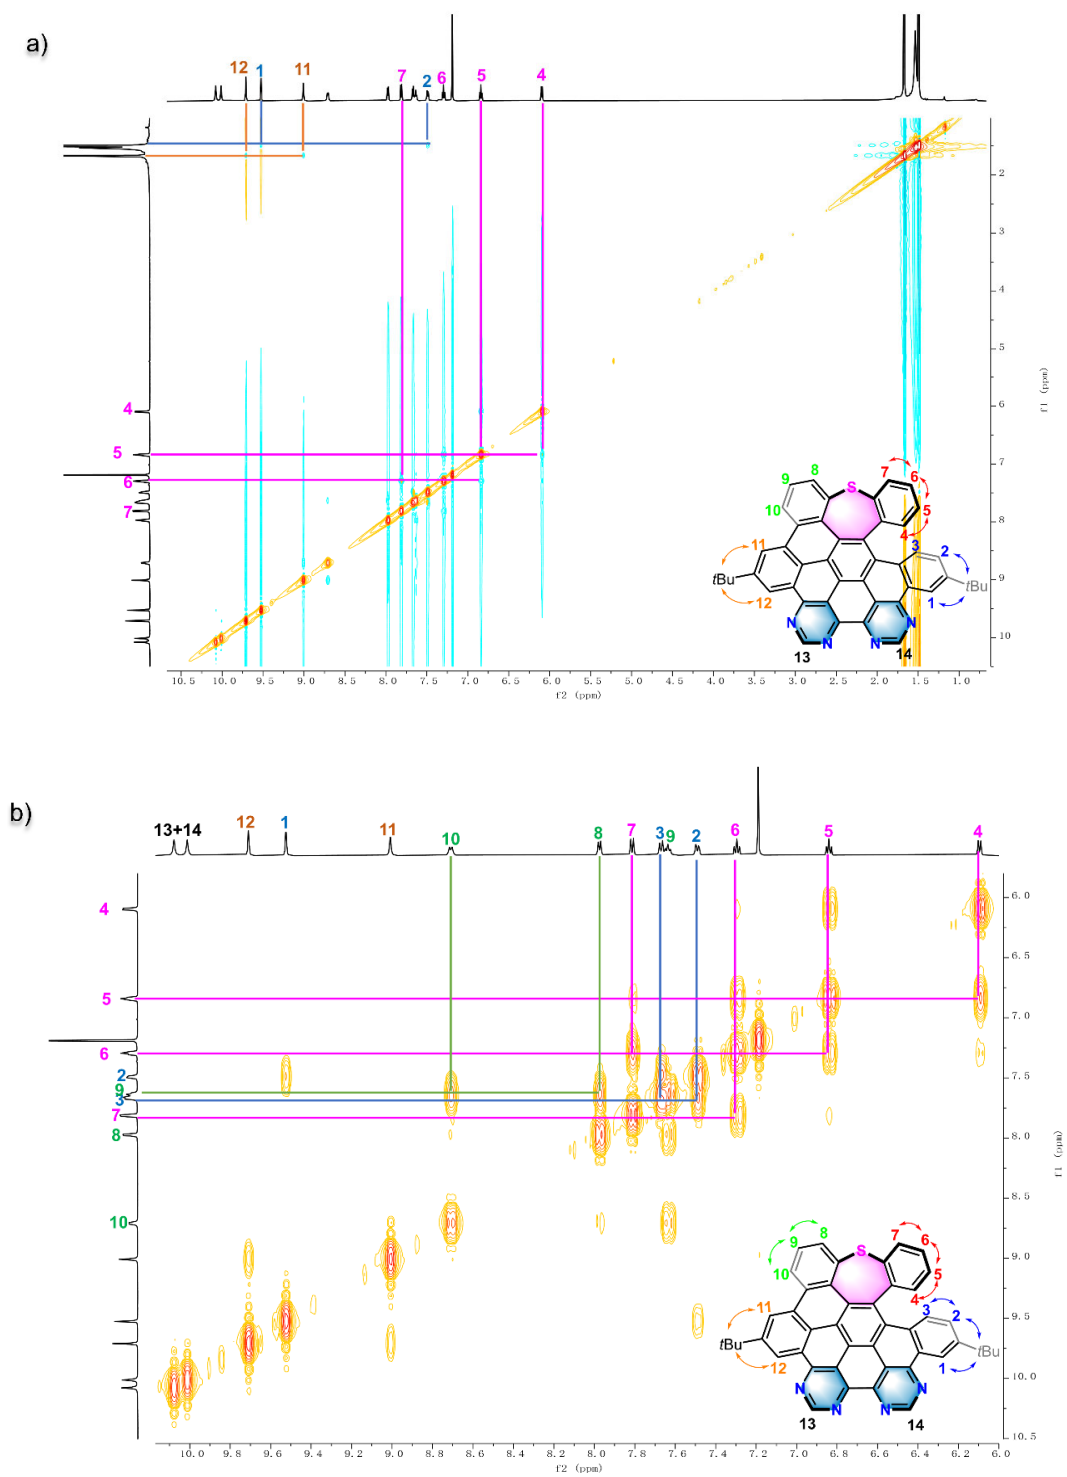



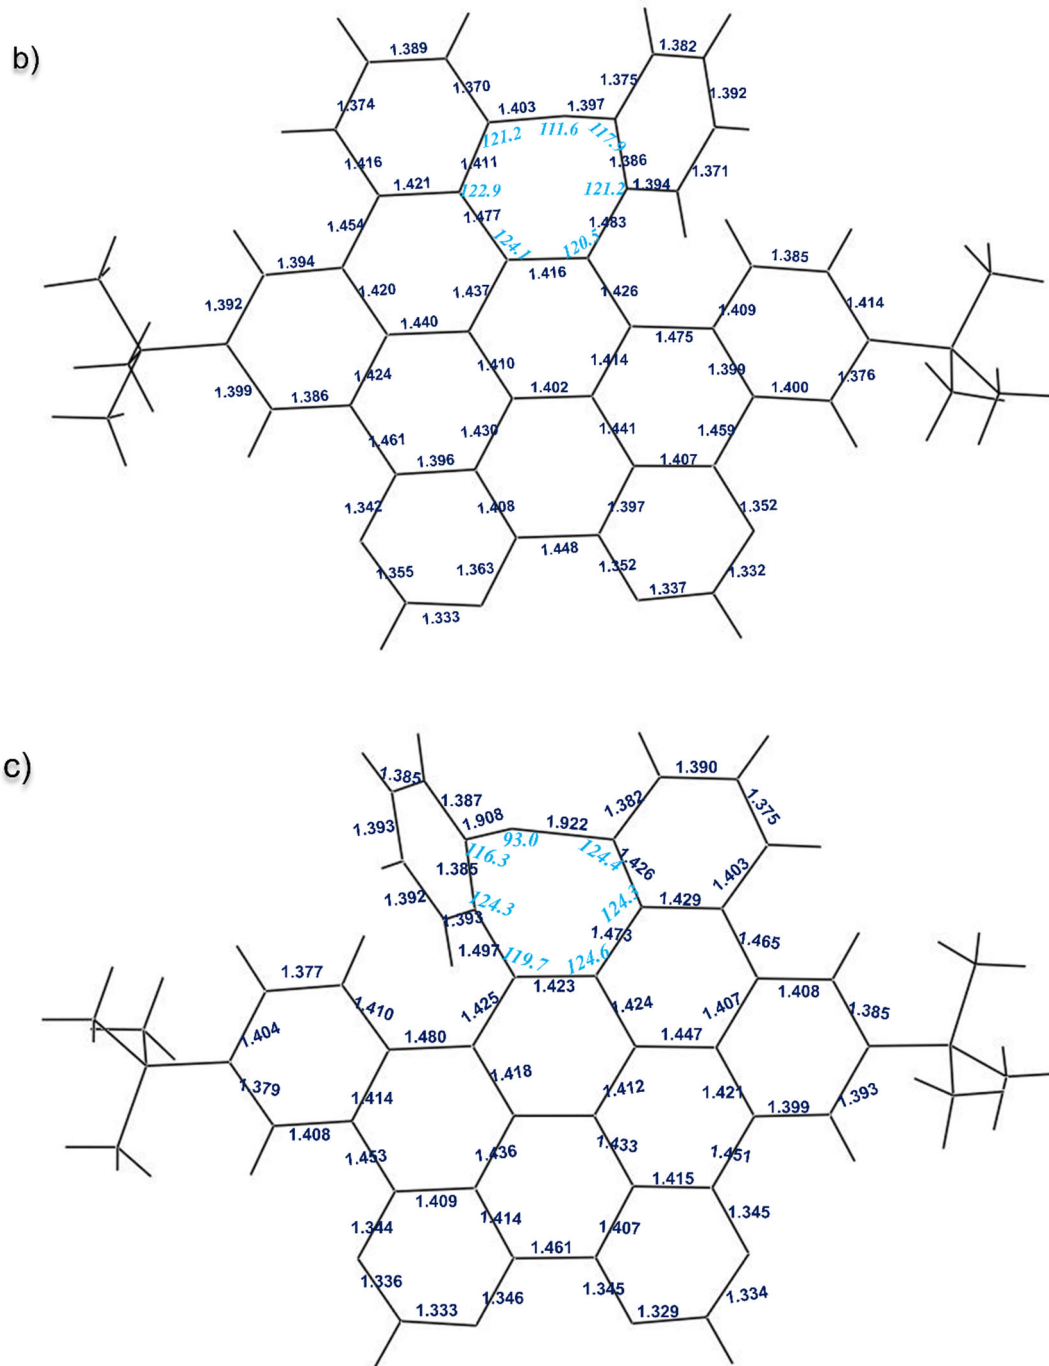

**Figure S3.** X-ray crystallographic structure of compounds **1**(a), **2** (b), and **4** (c) with bond lengths [Å] and angles of the seven-membered ring.

**Table S1.** Details of the Crystal Structure Analyses of Compounds **1**, **2** and **4**.

|                                                  | <b>1</b>                                                                      | <b>2</b>                                                         | <b>4</b>                                                                       |
|--------------------------------------------------|-------------------------------------------------------------------------------|------------------------------------------------------------------|--------------------------------------------------------------------------------|
| CCDC No.                                         | 2344508                                                                       | 2344509                                                          | 2344510                                                                        |
| empirical formula                                | C <sub>93</sub> H <sub>61</sub> Cl <sub>3</sub> N <sub>8</sub> O <sub>2</sub> | C <sub>47</sub> H <sub>34</sub> Cl <sub>2</sub> N <sub>4</sub> O | C <sub>93</sub> H <sub>66</sub> Cl <sub>2</sub> N <sub>8</sub> Se <sub>2</sub> |
| formula wt                                       | 1428.84                                                                       | 741.68                                                           | 1524.35                                                                        |
| crystal system                                   | tetragonal                                                                    | Monoclinic                                                       | Triclinic                                                                      |
| space group                                      | P 41 21 2                                                                     | P 1 n 1                                                          | P-1                                                                            |
| T (K)                                            | 150                                                                           | 150                                                              | 150                                                                            |
| <i>a</i> (Å)                                     | 14.9010(4)                                                                    | 12.9051(5)                                                       | 13.9675(10)                                                                    |
| <i>b</i> (Å)                                     | 14.9010(4)                                                                    | 10.5743(5)                                                       | 15.5987(11)                                                                    |
| <i>c</i> (Å)                                     | 64.976(3)                                                                     | 25.9985(13)                                                      | 17.3739(13)                                                                    |
| $\alpha$ (°)                                     | 90                                                                            | 90                                                               | 101.977(3)                                                                     |
| $\beta$ (°)                                      | 90                                                                            | 95.550(2)                                                        | 92.500(3)                                                                      |
| $\gamma$ (°)                                     | 90                                                                            | 90                                                               | 105.115(3)                                                                     |
| <i>V</i> (Å <sup>3</sup> )                       | 14427.3(10)                                                                   | 3531.2(3)                                                        | 3555.6(4)                                                                      |
| <i>Z</i>                                         | 8                                                                             | 4                                                                | 2                                                                              |
| $\rho$ <sub>calcd</sub> (mg/m <sup>3</sup> )     | 1.316                                                                         | 1.395                                                            | 1.424                                                                          |
| $\mu$ (mm <sup>-1</sup> )                        | 1.614                                                                         | 0.230                                                            | 2.434                                                                          |
| $\theta$ range (°)                               | 3.04–68.27                                                                    | 2.08–25.03                                                       | 2.61–68.47                                                                     |
| <i>F</i> (000)                                   | 5936                                                                          | 1544                                                             | 1564                                                                           |
| collected reflcns                                | 70190                                                                         | 44182                                                            | 53367                                                                          |
| unique reflcns no.                               | 12989                                                                         | 11961                                                            | 12993                                                                          |
| <i>R</i> [ <i>I</i> > 2 $\sigma$ ( <i>I</i> )]   | 0.1089                                                                        | 0.0630                                                           | 0.0390                                                                         |
| <i>R</i> (ref)                                   | 0.1378                                                                        | 0.1055                                                           | 0.0418                                                                         |
| <i>wR2</i> [ <i>I</i> > 2 $\sigma$ ( <i>I</i> )] | 0.2827                                                                        | 0.1392                                                           | 0.0945                                                                         |
| <i>wR2</i> (ref)                                 | 0.3060                                                                        | 0.1632                                                           | 0.0962                                                                         |

**Table S2** Photophysical properties of NGs **1–4** and **1-Me<sup>+</sup>** in solution<sup>a</sup>.

|                         | $\lambda_{\max}$ (nm) | $\epsilon_{\max}$ (M <sup>-1</sup> cm <sup>-1</sup> ) | $\lambda_{\text{em}}$ (nm) <sup>b</sup> | Stokes shift (cm <sup>-1</sup> ) | $\Phi_{\text{F}}$ <sup>c</sup> |
|-------------------------|-----------------------|-------------------------------------------------------|-----------------------------------------|----------------------------------|--------------------------------|
| <b>1</b>                | 390                   | 2.2×10 <sup>4</sup>                                   | 502                                     | 5721                             | 0.09                           |
| <b>2</b>                | 375                   | 3.3×10 <sup>4</sup>                                   | 517                                     | 7325                             | 0.13                           |
| <b>3</b>                | 375                   | 2.1×10 <sup>4</sup>                                   | 517                                     | 7325                             | 0.28                           |
| <b>4</b>                | 375                   | 1.7×10 <sup>4</sup>                                   | 525                                     | 7619                             | 0.03                           |
| <b>1-Me<sup>+</sup></b> | 419                   | 1.5×10 <sup>4</sup>                                   | 498, 545                                | 5687                             | <0.01                          |

<sup>a</sup> Measured in dichloromethane (10  $\mu\text{M}$ ). <sup>b</sup>  $\lambda_{\text{ex1}} = 335$  nm;  $\lambda_{\text{ex2-4}} = 375$  nm;  $\lambda_{\text{ex1-Me}^+} = 400$  nm. <sup>c</sup> Quinine sulfate ( $\Phi_{\text{F}} = 0.54$  in 0.1 M H<sub>2</sub>SO<sub>4</sub>) as a reference.

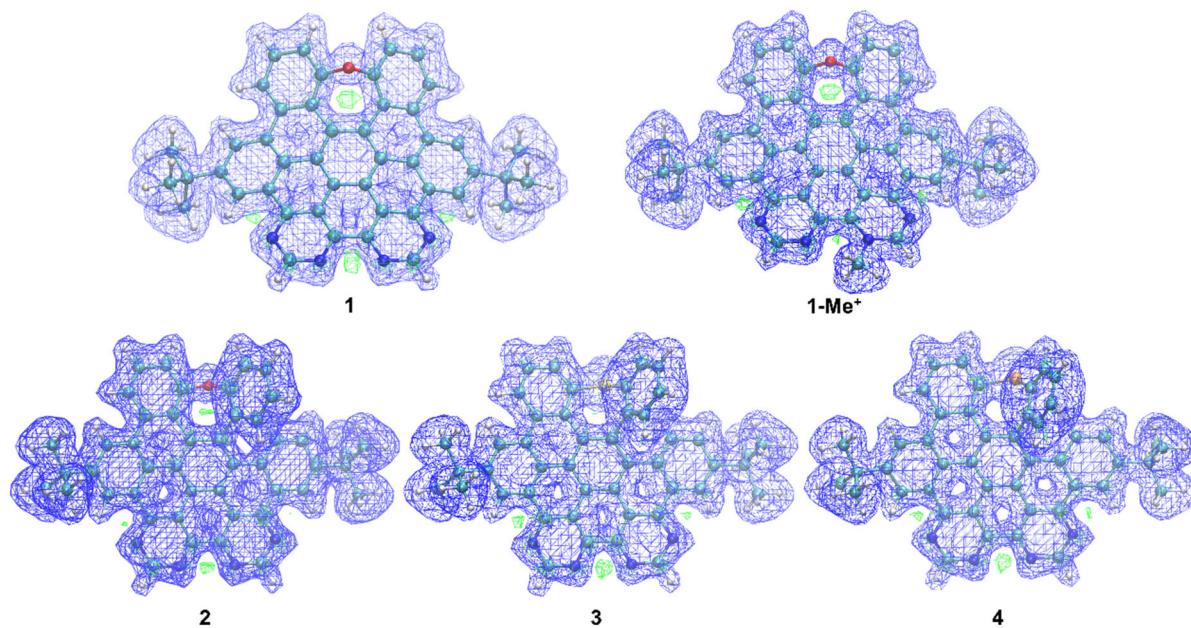

**Figure S4.** Calculated 3D ICSS map of NGs **1**, **1-Me<sup>+</sup>**, and **2-4**, isovalue = 5. Blue and green wireframes represent magnetically shielding and deshielding areas, respectively.

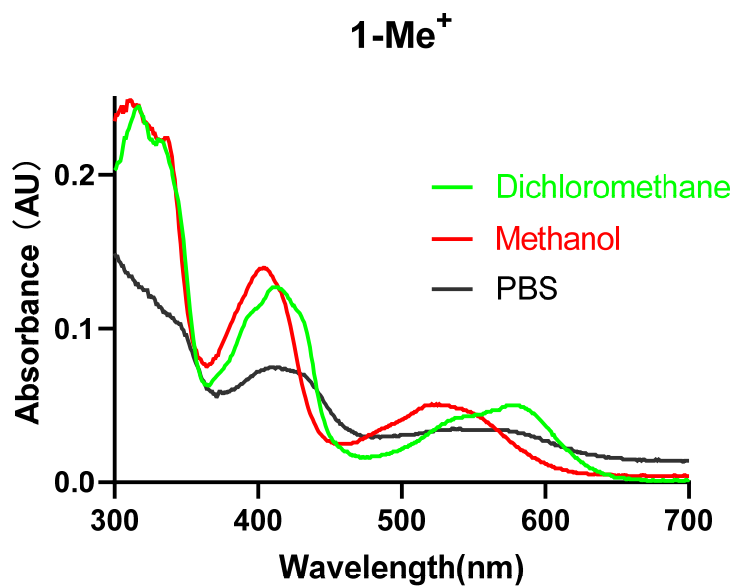

**Figure S5.** UV/vis absorption of NG **1-Me<sup>+</sup>** in different solvent at the concentration of 10  $\mu$ M.

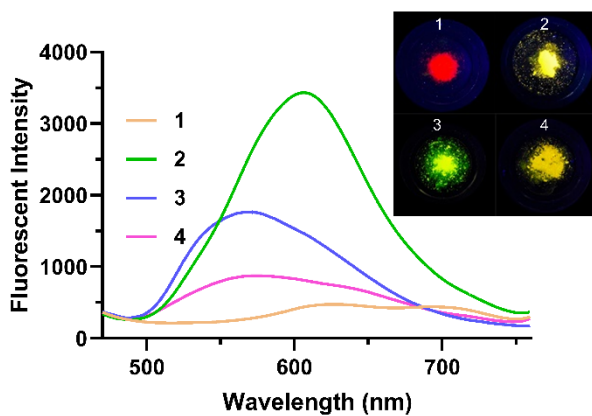

**Figure S6.** Solid-state fluorescence emission spectra of amorphous solid **1-4**. Inserted photographs are the solid under 365 nm UV lamp.

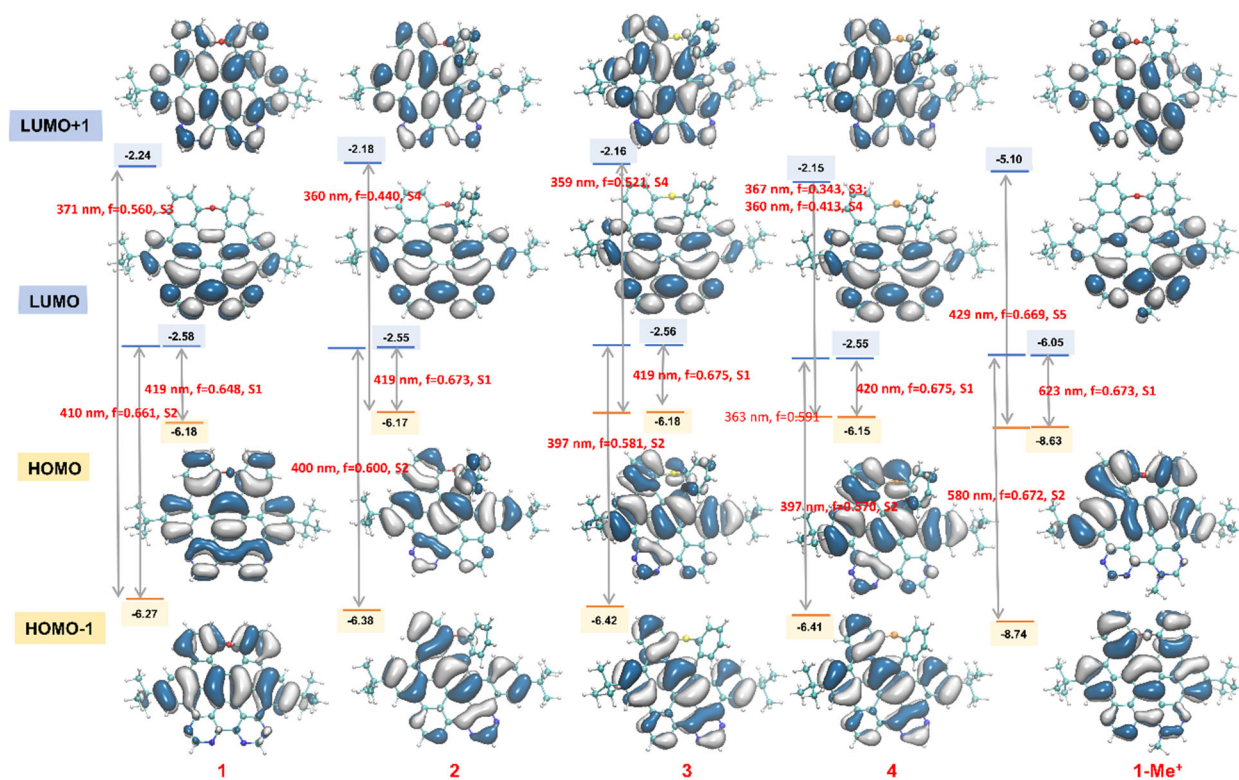

**Figure S7.** Molecular orbitals (HOMO-2–LUMO+2) with major transitions of compound **1**, **2**, **3**, **4**, and **1-Me<sup>+</sup>** calculated by DFT at the PBE0/def2-TZVP level of theory.

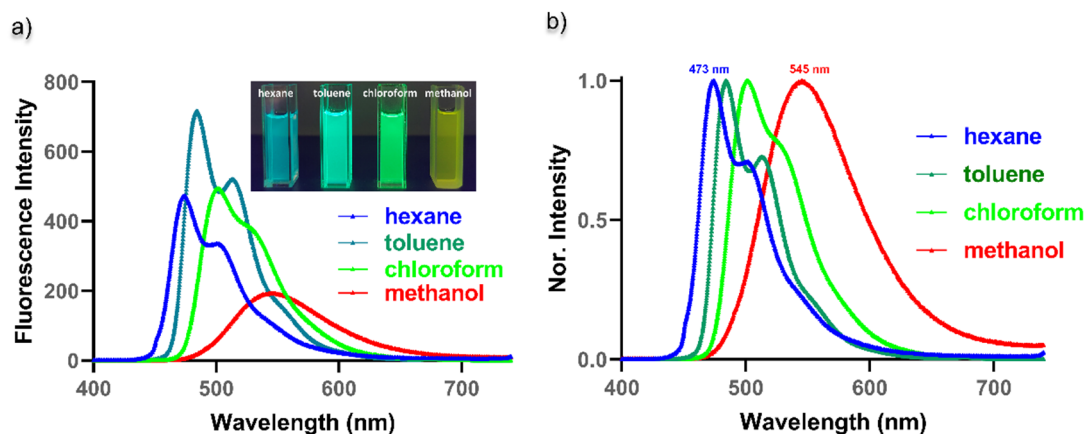

**Figure S8.** (a) Emission spectra of NG **1** in different solvents. (b) Solvatochromism of NG **1**. (Concentration, 10  $\mu$ M;  $\lambda_{\text{ex}}$  = 375 nm).



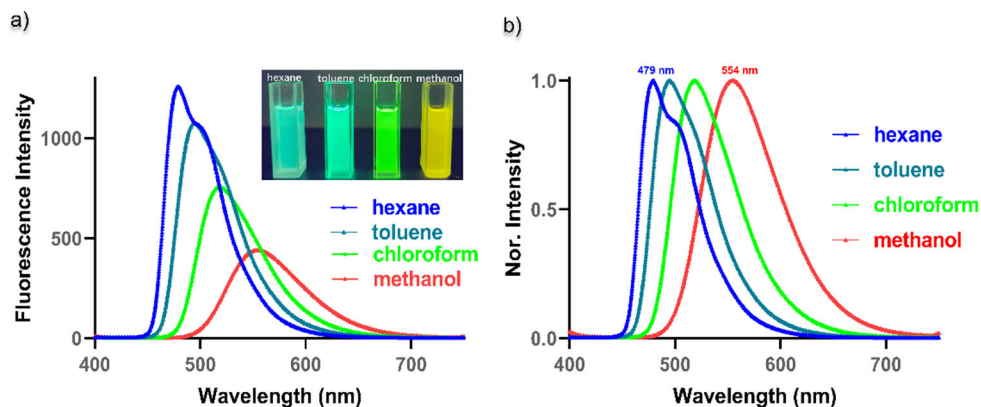

**Figure S9.** (a) Emission spectra of NG 2 in different solvents. (b) Solvatochromism of NG 2. (Concentration, 10  $\mu$ M;  $\lambda_{ex}$  = 375 nm).

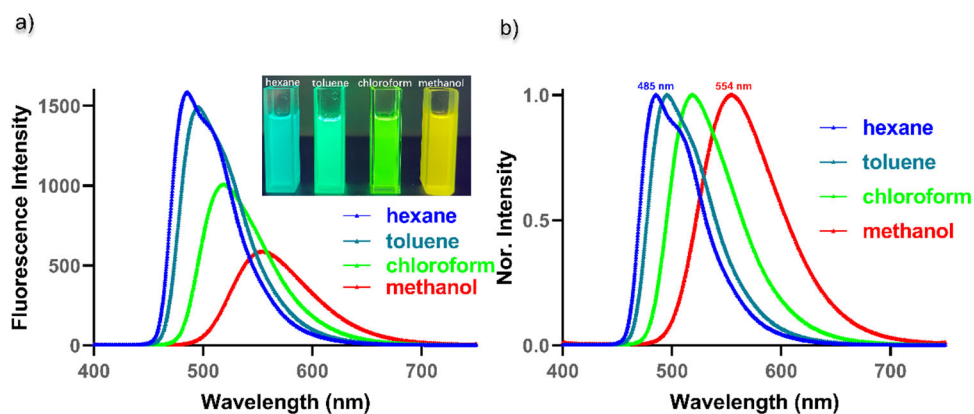

**Figure S10.** (a) Emission spectra of NG 3 in different solvents. (b) Solvatochromism of NG 3. (Concentration, 10  $\mu$ M;  $\lambda_{ex}$  = 375 nm).

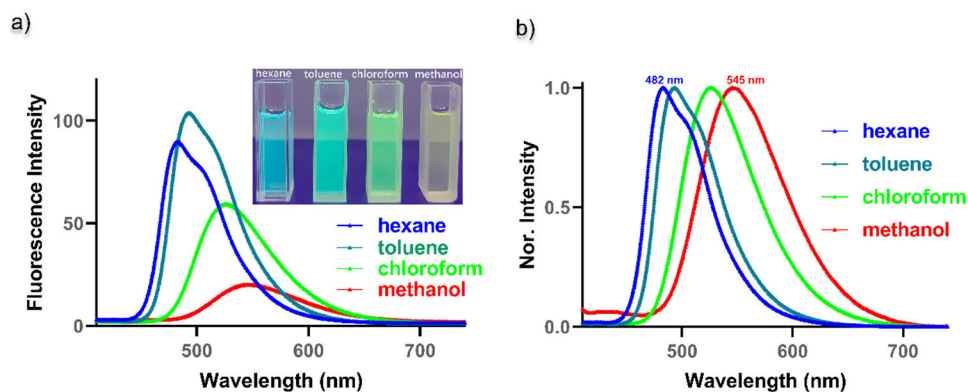

**Figure S11.** (a) Emission spectra of NG 4 in different solvents. (b) Solvatochromism of NG 4. (Concentration, 10  $\mu$ M;  $\lambda_{ex}$  = 375 nm).

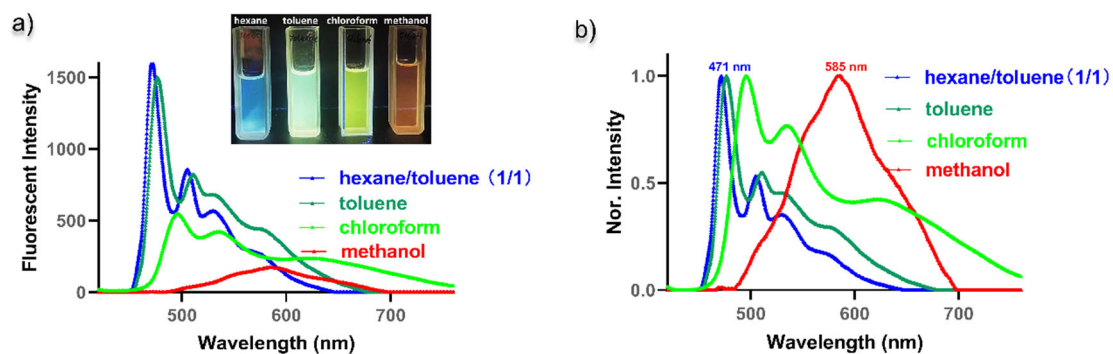

**Figure S12.** (a) Emission spectra of NG  $1\text{-Me}^+$  in different solvents. (b) Solvatochromism of  $1\text{-Me}^+$ . (Concentration,  $10\ \mu\text{M}$ ;  $\lambda_{\text{ex}} = 400\ \text{nm}$ ).

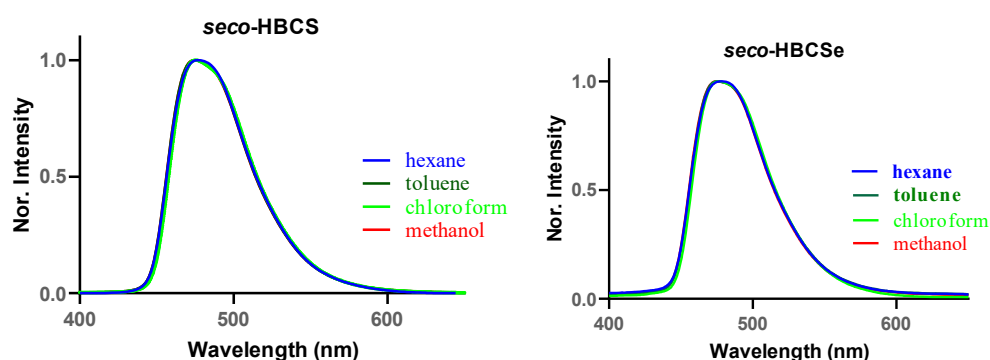

**Figure S13.** Solvatochromism experiment of *seco*-HBCS (a) and *seco*-HBCSe (b) concentration,  $5\ \mu\text{M}$ ,  $\lambda_{\text{ex}} = 350\ \text{nm}$ ).

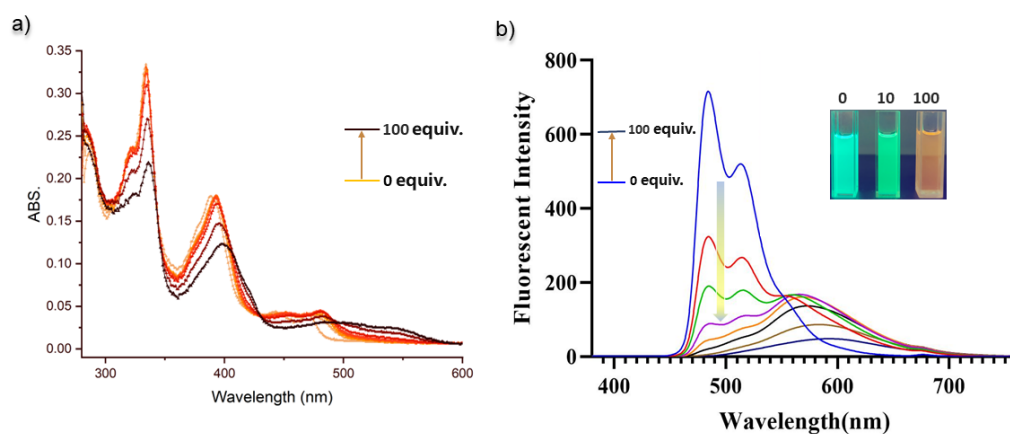

**Figure S14.** Changes in the UV/vis absorption (a) and emission spectra (b) of **1** on addition of trifluoroacetic acid, with the concentration of the **1** is  $10\ \mu\text{M}$ , and the concentration of trifluoroacetic acid is 0 to 100 times of it.

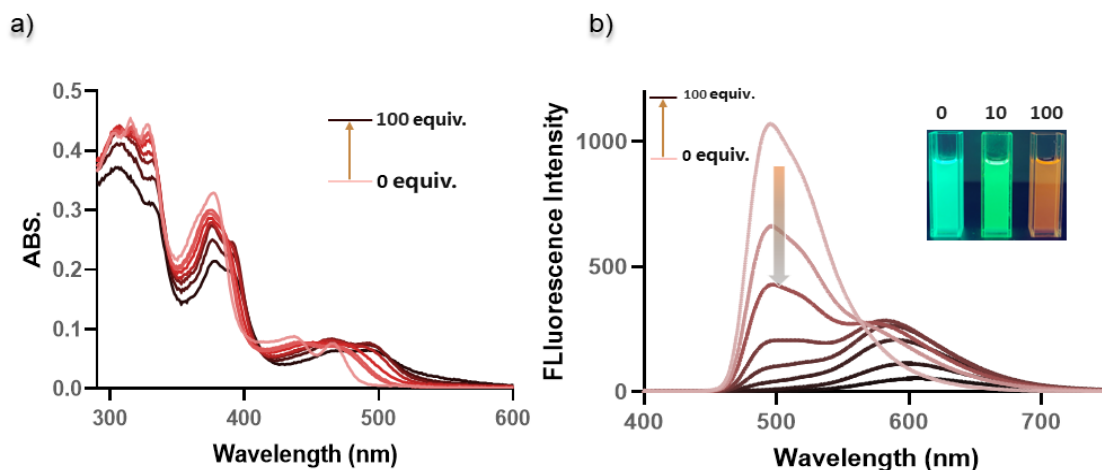

**Figure S15.** Changes in the UV/vis absorption (a) and emission spectra (b) of **2** on addition of trifluoroacetic acid, with the concentration of the **2** is 10  $\mu\text{M}$ , and the concentration of trifluoroacetic acid is 0 to 100 times of it.

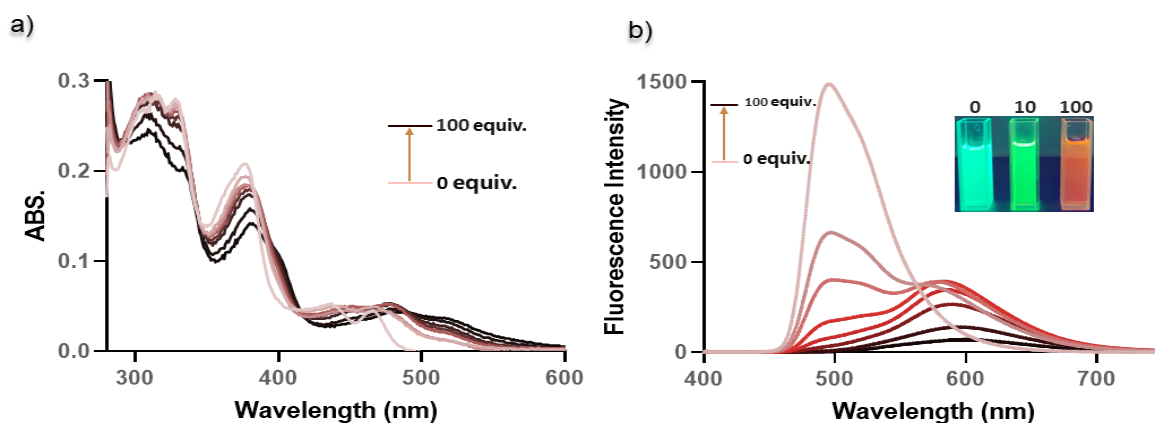

**Figure S16.** Changes in the UV/vis absorption (a) and emission spectra (b) of **3** on addition of trifluoroacetic acid, with the concentration of the **3** is 10  $\mu\text{M}$ , and the concentration of trifluoroacetic acid is 0 to 100 times of it.

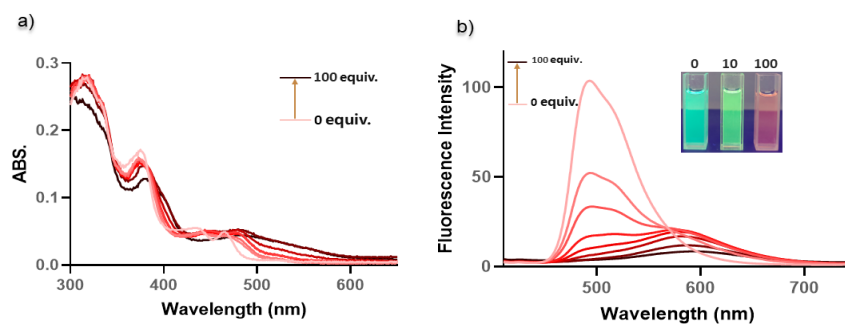

**Figure S17.** Changes in the UV/vis absorption (a) and emission spectra (b) of **4** on addition of Trifluoroacetic acid, with the concentration of the **4** is 10  $\mu\text{M}$ , and the concentration of trifluoroacetic acid is 0 to 100 times of it.

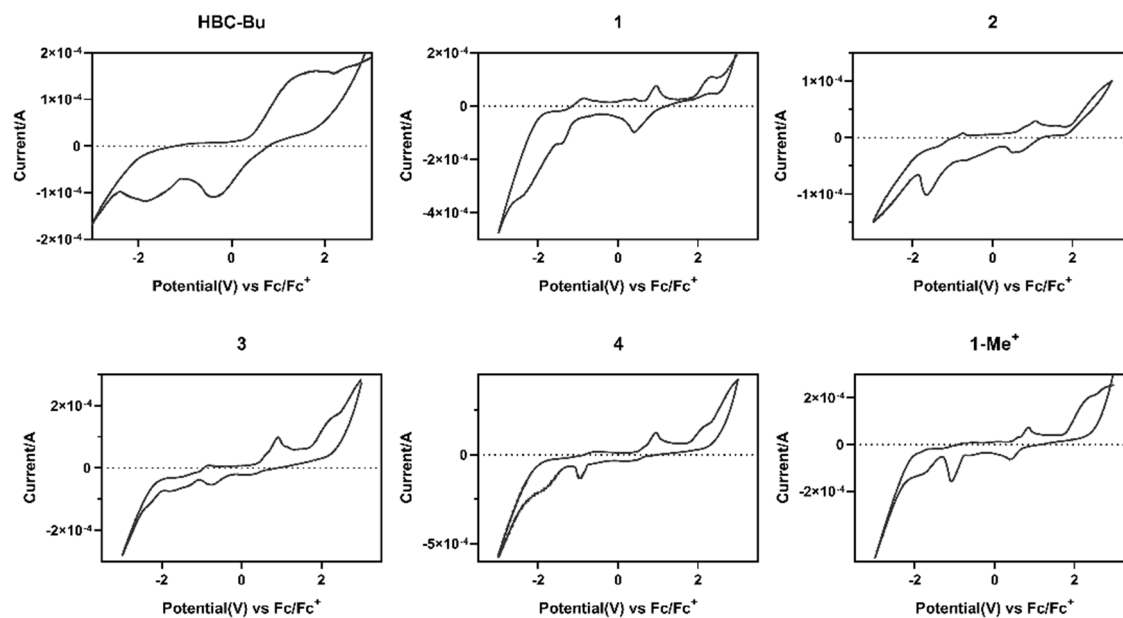

**Figure S18.** Cyclic voltammograms (CVs) of compounds **HBC-Bu**, **1–4**, and **1-Me<sup>+</sup>**, measured in dichloromethane containing n-BuNPF<sub>6</sub> (0.1 M) as a supporting electrolyte.

**Table S3.** Major transitions of nanographene **1** calculated by TD-DFT.

| Excited state | Energy (eV) | Wavelength (nm) | oscillator strength (f) | Description | Absolute contributions (%) |      |
|---------------|-------------|-----------------|-------------------------|-------------|----------------------------|------|
| 1             | 2.9568      | 419.32          | 0.0454                  | H -> L      | 0.64777                    | 83.9 |
|               |             |                 |                         | H-1 -> L+1  | -0.24439                   | 12.5 |
| 2             | 3.0226      | 410.19          | 0.0331                  | H-1 -> L    | 0.66128                    | 87.5 |
|               |             |                 |                         | H -> L+1    | 0.22563                    | 10.2 |
| 3             | 3.3433      | 370.84          | 0.1242                  | H-1 -> L+1  | 0.5598                     | 62.7 |
|               |             |                 |                         | H -> L+2    | 0.33093                    | 21.9 |
|               |             |                 |                         | H -> L      | 0.25208                    | 12.7 |
| 4             | 3.3453      | 370.62          | 0.3499                  | H -> L+1    | 0.6219                     | 77.4 |
|               |             |                 |                         | H-1 -> L    | -0.22043                   | 9.7  |
|               |             |                 |                         | H-1 -> L+2  | -0.20504                   | 8.4  |
| 5             | 3.4502      | 359.35          | 0.0000                  | H-4 -> L    | 0.68052                    | 92.6 |
| 6             | 3.4959      | 354.66          | 0.0028                  | H-5 -> L    | 0.6795                     | 92.3 |
| 7             | 3.6640      | 338.38          | 0.0331                  | H-3 -> L    | 0.65274                    | 85.2 |
| 8             | 3.6773      | 337.16          | 0.0067                  | H-2 -> L    | 0.67243                    | 90.4 |
| 9             | 3.8376      | 323.08          | 0.2042                  | H-2 -> L+1  | 0.49608                    | 49.2 |
|               |             |                 |                         | H-1 -> L+2  | -0.41627                   | 34.7 |
|               |             |                 |                         | H-3 -> L    | 0.20046                    | 8.0  |
| 10            | 3.8396      | 322.91          | 0.2393                  | H -> L+2    | 0.55858                    | 62.4 |
|               |             |                 |                         | H-1 -> L+1  | -0.30009                   | 18.0 |
|               |             |                 |                         | H-3 -> L+1  | -0.19541                   | 7.6  |

**Table S4.** Major transitions of nanographene **2** calculated by TD-DFT.

| Excited state | Energy (eV) | Wavelength (nm) | oscillator strength (f) | Description | Absolute contributions (%) |      |
|---------------|-------------|-----------------|-------------------------|-------------|----------------------------|------|
| 1             | 2.9581      | 419.13          | 0.1016                  | H -> L      | 0.67257                    | 91.1 |
|               |             |                 |                         | H-1 -> L+1  | -0.18648                   | 7.0  |
| 2             | 3.1015      | 399.76          | 0.0328                  | H-1 -> L    | 0.59936                    | 71.8 |
|               |             |                 |                         | H -> L+1    | 0.33913                    | 23.0 |
| 3             | 3.4246      | 362.04          | 0.1068                  | H-4 -> L    | 0.47100                    | 44.4 |
|               |             |                 |                         | H -> L+1    | -0.38081                   | 29.0 |
|               |             |                 |                         | H-1 -> L    | 0.22849                    | 10.4 |
|               |             |                 |                         | H-5 -> L    | -0.17644                   | 6.2  |
| 4             | 3.4412      | 360.29          | 0.1481                  | H -> L+1    | 0.43990                    | 38.7 |
|               |             |                 |                         | H-1 -> L    | 0.43594                    | 38.0 |
|               |             |                 |                         | H-5 -> L    | -0.24985                   | 12.5 |
| 5             | 3.4871      | 355.55          | 0.0257                  | H-5 -> L    | 0.60500                    | 73.2 |
|               |             |                 |                         | H-1 -> L+1  | -0.20647                   | 8.5  |
|               |             |                 |                         | H-4 -> L    | 0.16658                    | 5.5  |
| 6             | 3.5021      | 354.03          | 0.2009                  | H-1 -> L+1  | 0.54674                    | 59.8 |
|               |             |                 |                         | H -> L+2    | -0.27615                   | 15.3 |
|               |             |                 |                         | H-5 -> L    | 0.21155                    | 9.0  |
|               |             |                 |                         | H -> L      | 0.16157                    | 5.2  |
| 7             | 3.6402      | 340.60          | 0.0012                  | H-2 -> L    | 0.67677                    | 91.6 |
| 8             | 3.7970      | 326.53          | 0.0772                  | H-3 -> L    | 0.50358                    | 50.7 |
|               |             |                 |                         | H -> L+2    | 0.30970                    | 19.2 |
|               |             |                 |                         | H-2 -> L+1  | 0.24392                    | 11.9 |
|               |             |                 |                         | H-1 -> L+1  | 0.16857                    | 5.7  |
| 9             | 3.8957      | 318.26          | 0.3408                  | H -> L+2    | 0.42104                    | 35.5 |
|               |             |                 |                         | H-2 -> L+1  | -0.40777                   | 33.3 |
|               |             |                 |                         | H-1 -> L+1  | 0.23169                    | 10.7 |
|               |             |                 |                         | H-1 -> L+2  | -0.19116                   | 7.3  |
| 10            | 3.9163      | 316.59          | 0.0617                  | H-2 -> L+1  | 0.46952                    | 44.1 |
|               |             |                 |                         | H-3 -> L    | -0.38495                   | 29.6 |
|               |             |                 |                         | H -> L+2    | 0.28257                    | 16.0 |

**Table S5.** Major transitions of nanographene **3** calculated by TD-DFT.

| Excited state | Energy (eV) | Wavelength (nm) | oscillator strength (f) | Description | Absolute contributions (%) |      |
|---------------|-------------|-----------------|-------------------------|-------------|----------------------------|------|
| 1             | 2.9618      | 418.61          | 0.1115                  | H -> L      | 0.67501                    | 91.1 |
|               |             |                 |                         | H-1 -> L+1  | 0.17405                    | 6.1  |
| 2             | 3.1250      | 396.75          | 0.0259                  | H-1 -> L    | 0.58072                    | 67.4 |
|               |             |                 |                         | H -> L+1    | -0.36606                   | 26.8 |
| 3             | 3.4217      | 362.35          | 0.0195                  | H-5 -> L    | 0.6082                     | 74.0 |
|               |             |                 |                         | H-6-> L     | 0.33093                    | 9.2  |
|               |             |                 |                         | H -> L+1    | -0.21429                   | 5.4  |
| 4             | 3.4558      | 358.77          | 0.2124                  | H -> L+1    | 0.52066                    | 54.2 |
|               |             |                 |                         | H-1 -> L    | 0.34289                    | 23.5 |
|               |             |                 |                         | H-5 -> L    | 0.22114                    | 9.8  |
| 5             | 3.4864      | 355.62          | 0.0118                  | H-6 -> L    | 0.63264                    | 80.0 |
|               |             |                 |                         | H-5 -> L    | 0.17806                    | 6.3  |
| 6             | 3.5307      | 351.16          | 0.1424                  | H-1 -> L+1  | 0.53986                    | 58.3 |
|               |             |                 |                         | H -> L+2    | 0.35608                    | 25.4 |
| 7             | 3.5658      | 347.70          | 0.0186                  | H-2 -> L    | 0.65797                    | 86.6 |
| 8             | 3.7430      | 331.24          | 0.0179                  | H-2 -> L    | 0.65797                    | 86.6 |
|               |             |                 |                         | H-3 -> L    | -0.33744                   | 22.8 |
|               |             |                 |                         | H -> L+2    | 0.17203                    | 5.9  |
| 9             | 3.7840      | 327.65          | 0.1035                  | H-3 -> L    | 0.40372                    | 32.6 |
|               |             |                 |                         | H-2 -> L+1  | 0.37992                    | 28.9 |
|               |             |                 |                         | H -> L+2    | -0.24418                   | 11.9 |
|               |             |                 |                         | H-1 -> L+1  | 0.22461                    | 10.1 |
| 10            | 3.8714      | 320.26          | 0.3990                  | H -> L+2    | 0.46619                    | 43.5 |
|               |             |                 |                         | H-3 -> L    | 0.30505                    | 18.6 |
|               |             |                 |                         | H-1 -> L+1  | -0.26412                   | 14.0 |
|               |             |                 |                         | H-1 -> L+2  | -0.24740                   | 12.2 |

**Table S6.** Major transitions of nanographene **4** calculated by TD-DFT.

| Excited state | Energy (eV) | Wavelength (nm) | oscillator strength (f) | Description | Absolute contributions (%) |      |
|---------------|-------------|-----------------|-------------------------|-------------|----------------------------|------|
| 1             | 2.9496      | 420.34          | 0.1076                  | H -> L      | 0.67518                    | 91.2 |
|               |             |                 |                         | H-1 -> L+1  | 0.16884                    | 5.7  |
| 2             | 3.1254      | 396.70          | 0.0220                  | H-1 -> L    | 0.56990                    | 65.0 |
|               |             |                 |                         | H -> L+1    | -0.38123                   | 29.1 |
| 3             | 3.3830      | 366.49          | 0.0856                  | H-2 -> L    | 0.48841                    | 47.7 |
|               |             |                 |                         | H -> L+1    | -0.34294                   | 23.5 |
|               |             |                 |                         | H-1 -> L    | -0.26770                   | 14.3 |
|               |             |                 |                         | H-2 -> L+1  | -0.18374                   | 6.8  |
| 4             | 3.4214      | 362.38          | 0.0073                  | H-5 -> L    | 0.61489                    | 75.6 |
|               |             |                 |                         | H-2 -> L    | -0.19661                   | 7.7  |
|               |             |                 |                         | H-6 -> L    | -0.17418                   | 6.1  |
| 5             | 3.4483      | 359.55          | 0.1349                  | H-2 -> L    | 0.42273                    | 35.7 |
|               |             |                 |                         | H -> L+1    | 0.41342                    | 34.2 |
|               |             |                 |                         | H-1 -> L    | 0.24031                    | 11.5 |
| 6             | 3.4889      | 355.37          | 0.0028                  | H-6 -> L    | 0.64239                    | 82.5 |
|               |             |                 |                         | H-5 -> L    | 0.19252                    | 7.4  |
| 7             | 3.5318      | 351.05          | 0.1406                  | H-1 -> L+1  | 0.52731                    | 55.6 |
|               |             |                 |                         | H -> L+2    | 0.38613                    | 29.8 |
| 8             | 3.6240      | 342.12          | 0.0206                  | H-2 -> L+1  | 0.64596                    | 83.5 |
| 9             | 3.7531      | 330.35          | 0.0952                  | H-3 -> L    | 0.54903                    | 60.3 |
|               |             |                 |                         | H -> L+2    | -0.25765                   | 13.3 |
|               |             |                 |                         | H-1 -> L+1  | 0.21707                    | 9.4  |
| 10            | 3.8548      | 321.64          | 0.4174                  | H -> L+2    | 0.47748                    | 45.6 |
|               |             |                 |                         | H-1 -> L+1  | -0.29889                   | 17.9 |
|               |             |                 |                         | H-3 -> L    | 0.29348                    | 17.2 |
|               |             |                 |                         | H-1 -> L+2  | -0.21561                   | 9.3  |



**Table S7.** Major transitions of nanographene **1-Me<sup>+</sup>** calculated by TD-DFT.

| Excited state | Energy (eV) | Wavelength (nm) | oscillator strength (f) | Description | Absolute contributions (%) |      |
|---------------|-------------|-----------------|-------------------------|-------------|----------------------------|------|
| 1             | 1.9896      | 623.16          | 0.0653                  | H -> L      | 0.67315                    | 90.6 |
|               |             |                 |                         | H-1 -> L    | -0.17860                   | 6.4  |
| 2             | 2.1361      | 580.42          | 0.0736                  | H-1 -> L    | 0.67184                    | 90.3 |
|               |             |                 |                         | H -> L      | 0.17823                    | 6.4  |
| 3             | 2.4675      | 502.47          | 0.0032                  | H-2 -> L    | 0.70233                    | 98.7 |
| 4             | 2.6930      | 460.39          | 0.0203                  | H-3 -> L    | 0.67962                    | 92.4 |
| 5             | 2.8924      | 428.66          | 0.0943                  | H -> L+1    | 0.66903                    | 89.5 |
| 6             | 3.0423      | 407.53          | 0.1790                  | H-1 -> L+1  | 0.62101                    | 77.1 |
| 7             | 3.0636      | 404.70          | 0.0076                  | H-6 -> L    | 0.66060                    | 87.3 |
| 8             | 3.1638      | 391.88          | 0.0158                  | H-4 -> L    | 0.66346                    | 88.0 |
| 9             | 3.3272      | 372.64          | 0.0062                  | H-2 -> L+1  | 0.69187                    | 95.7 |
| 10            | 3.3576      | 369.26          | 0.0394                  | H-5 -> L    | 0.66138                    | 87.5 |
| 11            | 3.5597      | 348.30          | 0.0096                  | H-3 -> L+1  | 0.53367                    | 57.0 |
|               |             |                 |                         | H -> L+2    | 0.33898                    | 23.0 |
|               |             |                 |                         | H-1 -> L+2  | 0.20347                    | 8.3  |
| 12            | 3.5813      | 346.20          | 0.0022                  | H-7 -> L    | 0.47971                    | 46.0 |
|               |             |                 |                         | H-1 -> L+2  | -0.30556                   | 18.7 |
|               |             |                 |                         | H -> L+2    | 0.29957                    | 17.9 |
| 13            | 3.6710      | 337.74          | 0.1141                  | H -> L+2    | 0.44859                    | 40.2 |
|               |             |                 |                         | H-7 -> L    | -0.39778                   | 31.6 |
|               |             |                 |                         | H -> L+3    | -0.17315                   | 6.0  |

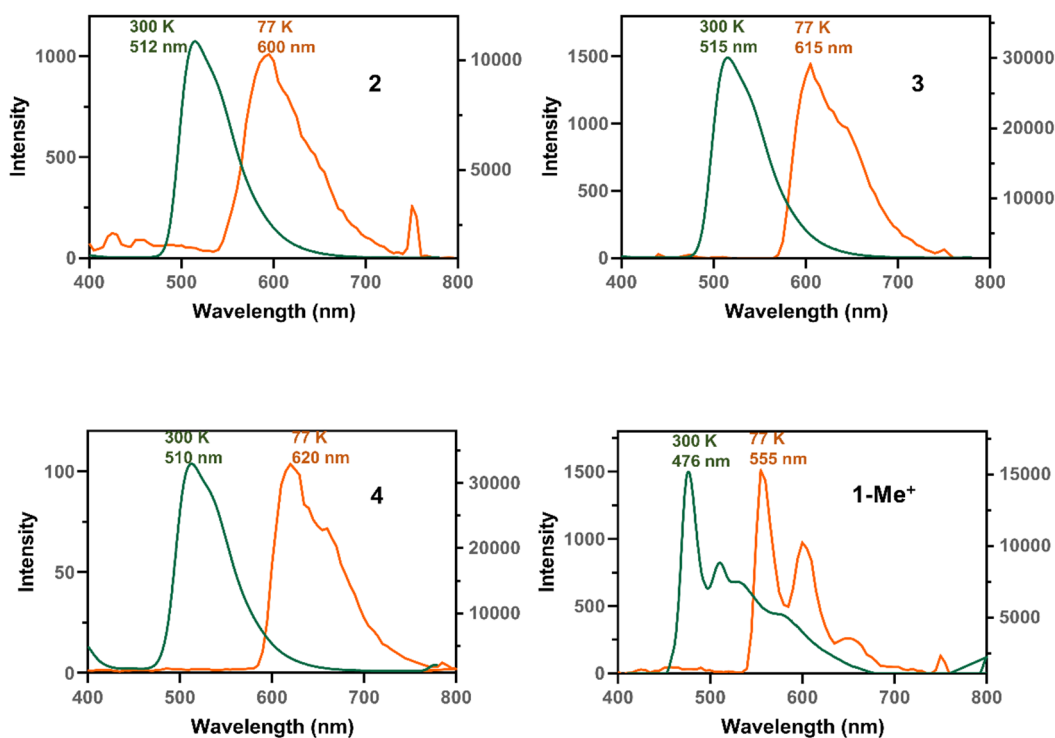

**Figure S19.** Photoluminescence spectra of in toluene at 300 or 77 K.  $\lambda_{\text{ex}} = 375$  nm.

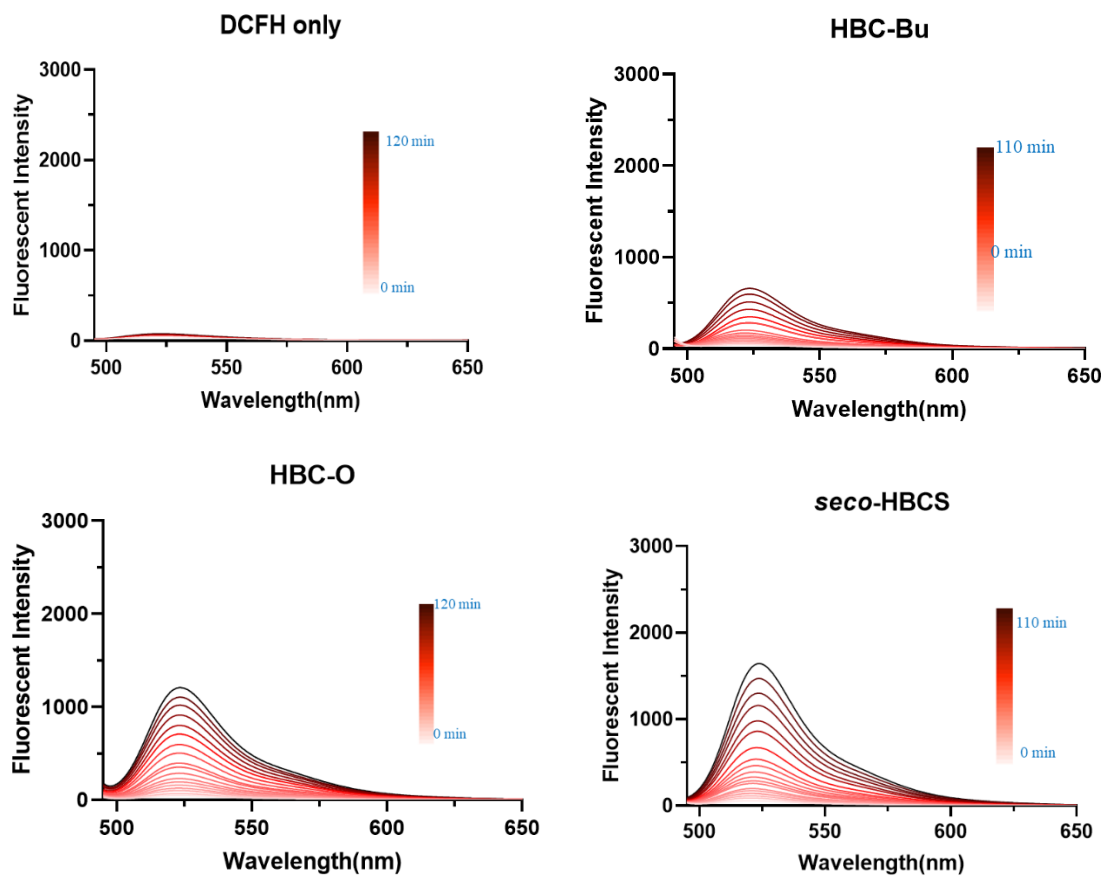

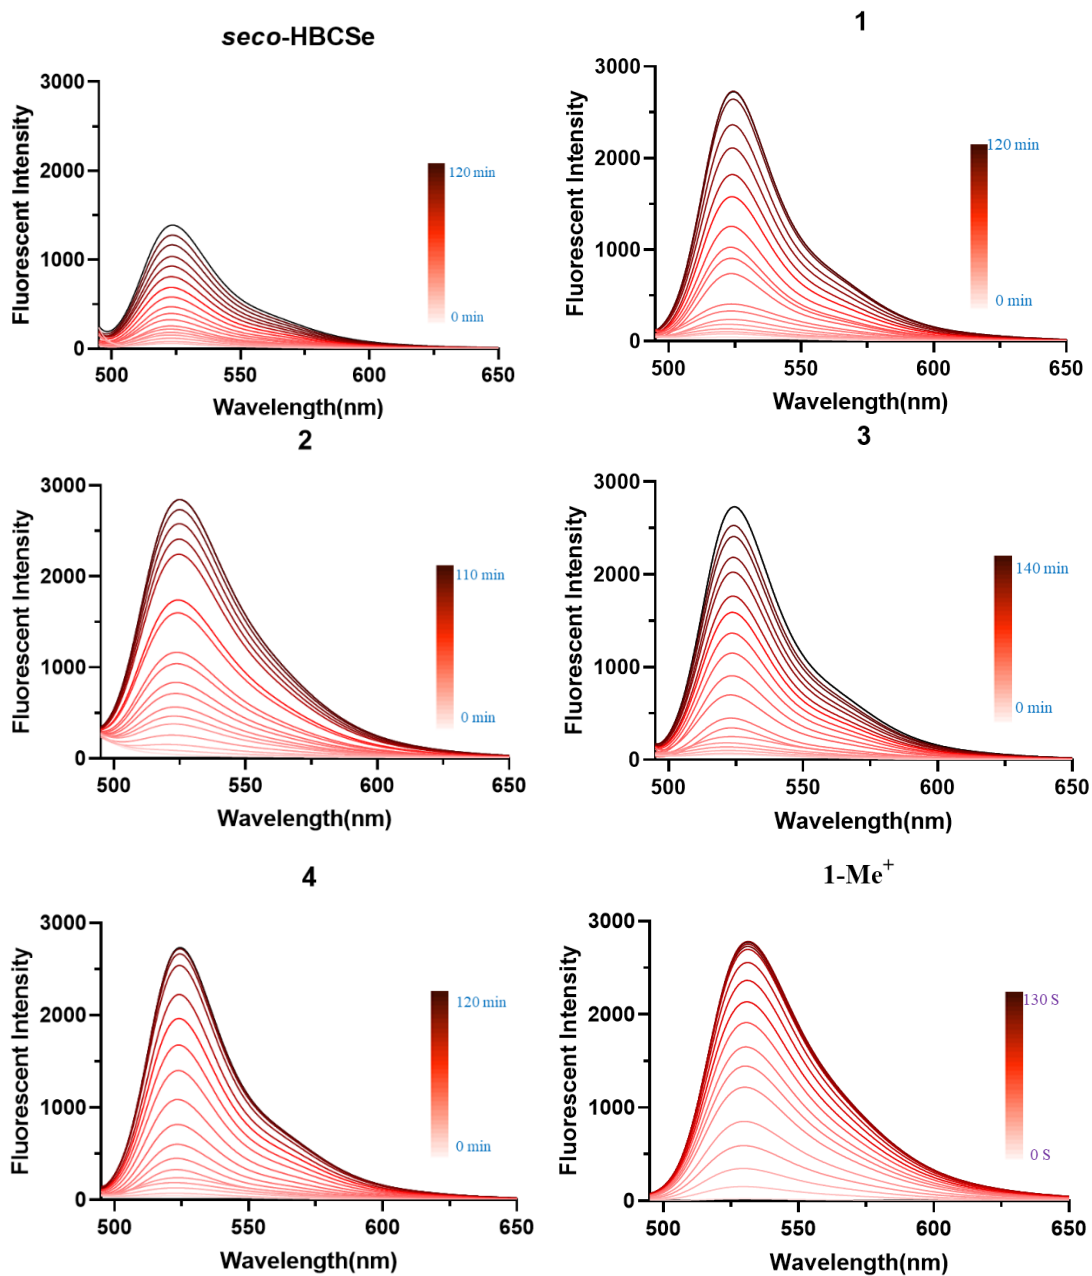

**Figure S20.** Emission spectra of DCFH (4 μM) in PBS buffer and methanol (v:v=9:1) in the presence of DCFH only, HBC-Bu, HBC-O, *seco*-HBCS, *seco*-HBCSe, 1, 2, 3, 4, and 1-Me<sup>+</sup>(20 μM), after exposure to yellow LED irradiation(0.02 W/cm<sup>2</sup>) with different time.

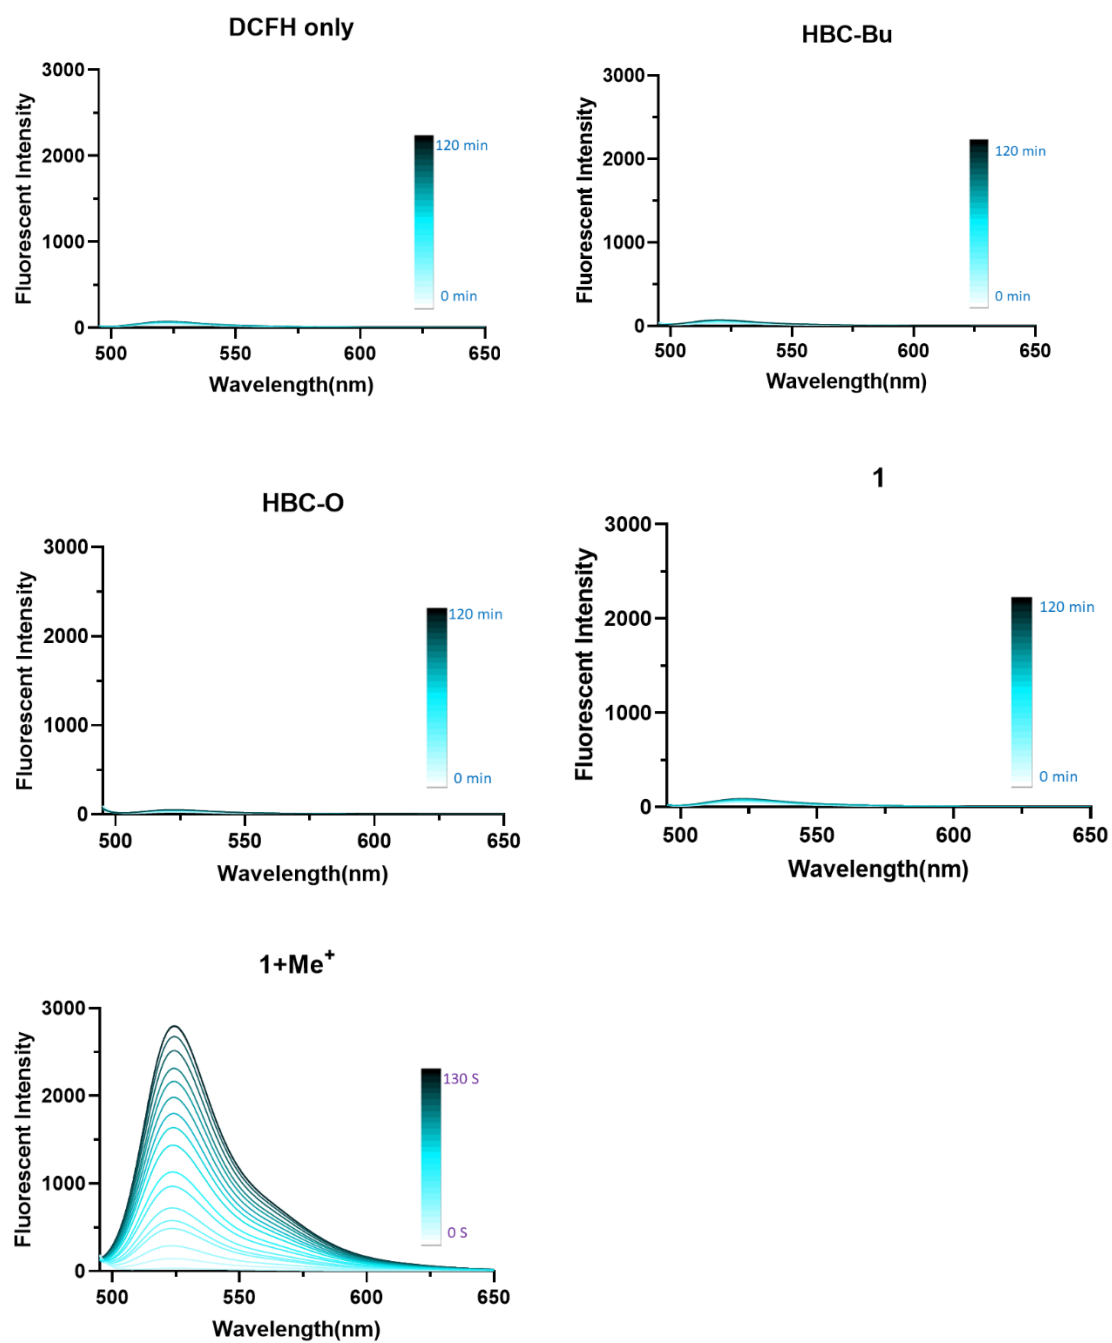

**Figure S21.** Emission spectra of DCFH (4 μM) in PBS buffer and methanol (v:v=9:1) in the presence of **DCFH only**, **HBC-Bu**, **HBC-O**, **1** and **1+Me<sup>+</sup>**(20 μM) , after exposure to 630 nm laser irradiation (0.15 W/cm<sup>2</sup>) with different time.

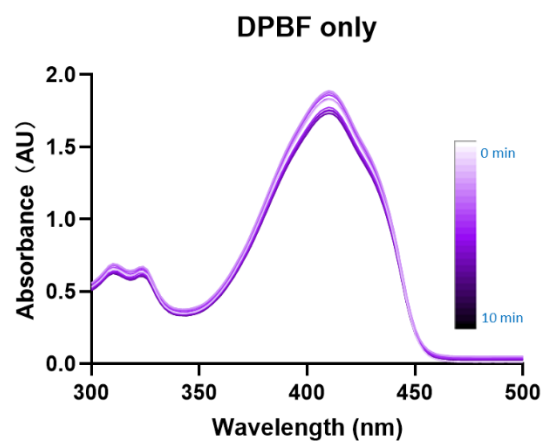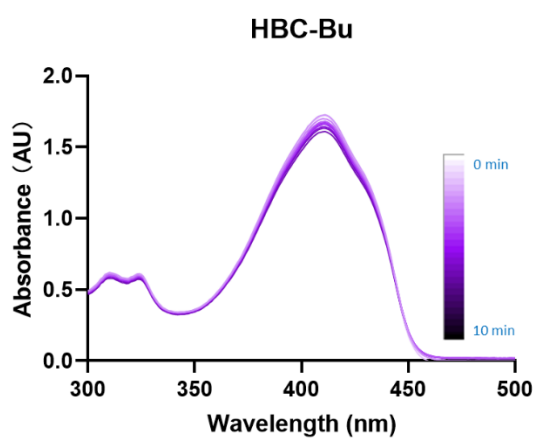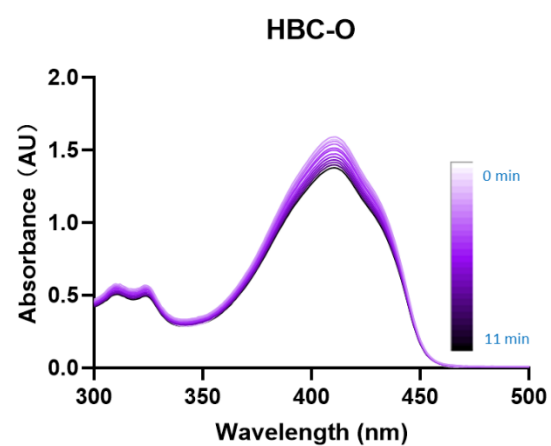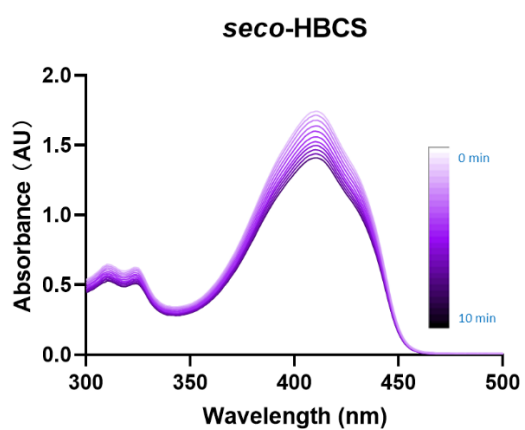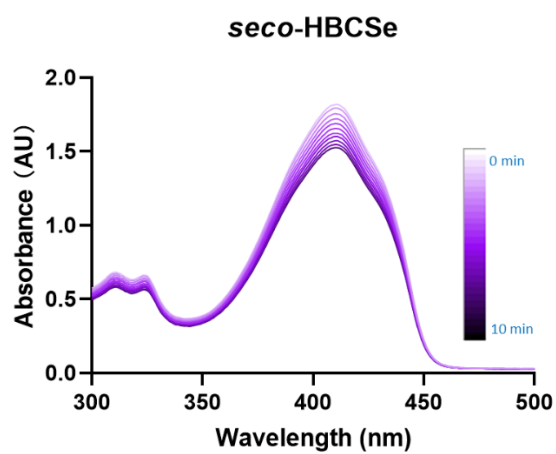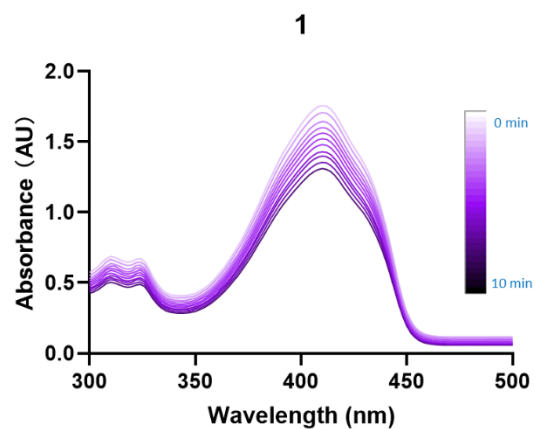

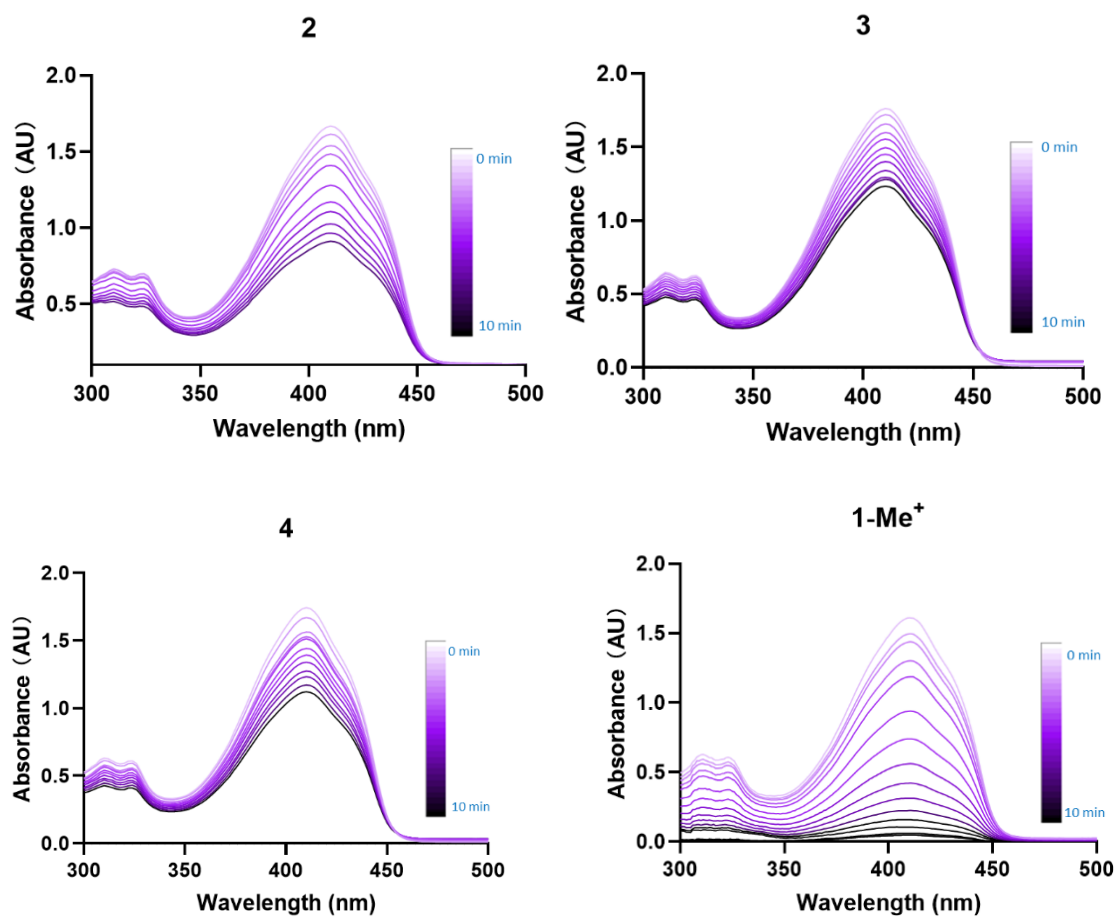

**Figure S22.** Absorption spectra of DPBF (80  $\mu\text{M}$ ) in PBS buffer and methanol (v:v=1:9) in the presence of DPBF only, HBC-Bu, HBC-O, HBC-S, HBC-Se, 1, 2, 3, 4, and 1-Me<sup>+</sup> (20  $\mu\text{M}$ ), after exposure to yellow LED irradiation (0.02 W/cm<sup>2</sup>) with different time.

a)

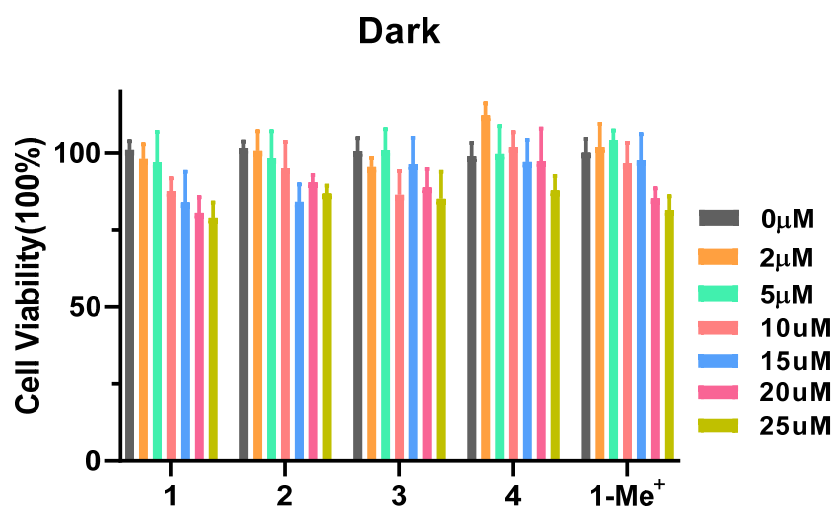

b)

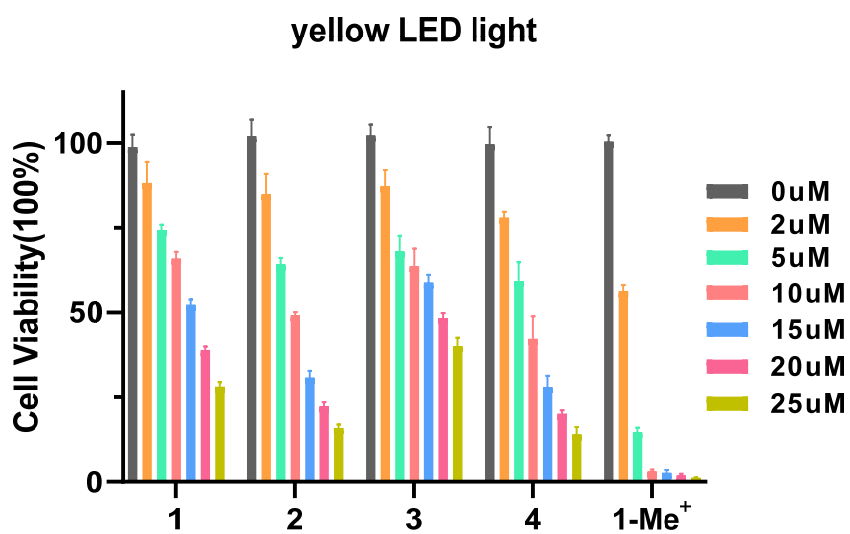

**Figure S23.** Cell viability of HeLa cells after incubation of 1–4 and 1-Me<sup>+</sup> with or without yellow LED light irradiation for 30min (0.02 W/cm<sup>2</sup>, n = 4, mean  $\pm$  SD).

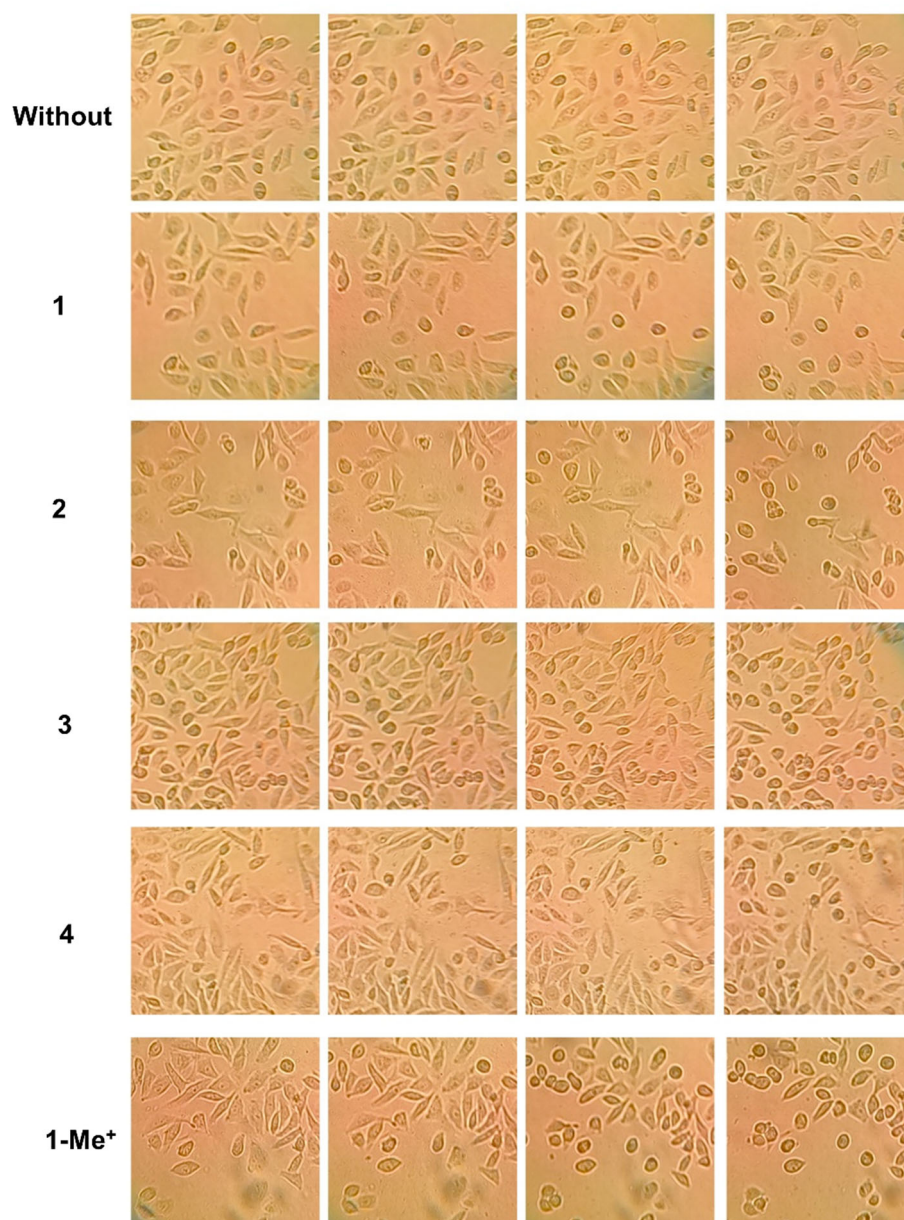

**Figure S24.** HeLa cell morphological changes incubated with different compounds (10  $\mu$ M) under yellow LED light irradiation monitored during 5 mins (0.02 W/cm<sup>2</sup>).



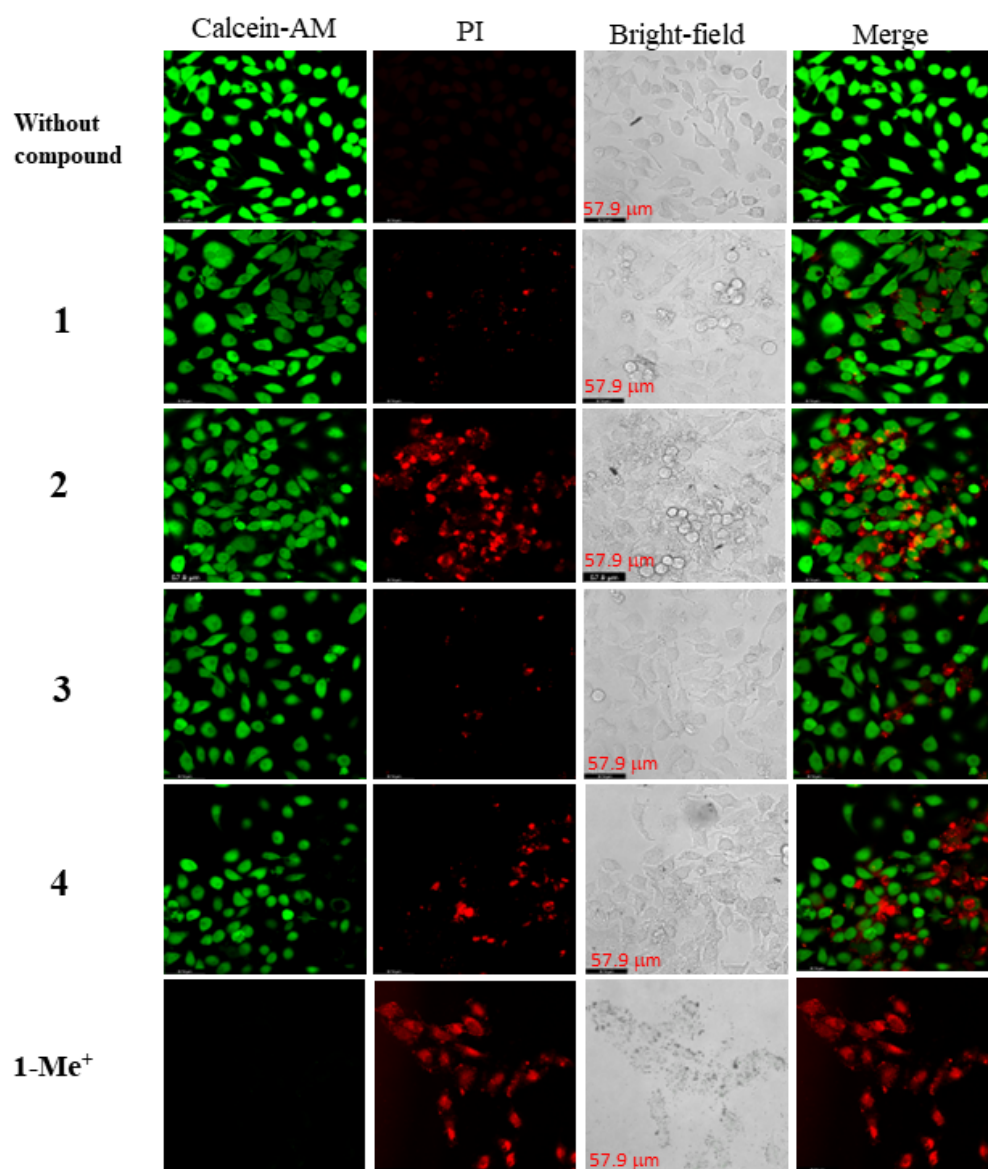

**Figure S25.** Confocal laser scanning microscopy evaluation of tumor killing effect by calcein AM /propidium iodide (PI) dyes in HeLa cells treated with NGs1-4 and 1-Me<sup>+</sup> (10 μM) under yellow LED light treatment (0.02 W/cm<sup>2</sup>).

## Reference:

- [S1] M. J. Frisch, G. W. Trucks, H. B. Schlegel, G. E. Scuseria, M. A. Robb, J. R. Cheeseman, G. Scalmani, V. Barone, B. Mennucci, G. A. Petersson, H. Nakatsuji, M. Caricato, X. Li, H. P. Hratchian, A. F. Izmaylov, J. Bloino, G. Zheng, J. L. Sonnenberg, M. Hada, M. Ehara, K. Toyota, R. Fukuda, J. Hasegawa, M. Ishida, T. Nakajima, Y. Honda, O. Kitao, H. Nakai, T. Vreven, J. A. Montgomery, Jr., J. E. Peralta, F. Ogliaro, M. Bearpark, J. J. Heyd, E. Brothers, K. N. Kudin, V. N. Staroverov, T. Keith, R. Kobayashi, J. Normand, K. Raghavachari, A. Rendell, J. C. Burant, S. S. Iyengar, J. Tomasi, M. Cossi, N. Rega, J. M. Millam, M. Klene, J. E. Knox, J. B. Cross, V. Bakken, C. Adamo, J. Jaramillo, R. Gomperts, R. E. Stratmann, O. Yazyev, A. J. Austin, R. Cammi, C. Pomelli, J. W. Ochterski, R. L. Martin, K. Morokuma, V. G. Zakrzewski, G. A. Voth, P. Salvador, J. J. Dannenberg, S. Dapprich, A. D. Daniels, O. Farkas, J. B. Foresman, J. V. Ortiz, J. Cioslowski, D. J. Fox, Gaussian 16, Gaussian, Inc., Wallingford CT, **2016**.
- [S2] Raghavachari, K.; Binkley, J. S. Seeger, R.; J. A. Pople. Self-Consistent Molecular Orbital Methods. XX. Basis set for correlated wave-functions. *J. Chem. Phys.* **1980**, *72*, 650–654.
- [S3] Wolinski, K. *et al*, Efficient Implementation of the Gauge-Independent Atomic Orbital Method for NMR Chemical Shift Calculations. *J. Am. Chem. Soc.* **1990**, *112*, 8251–8260.
- [S4] Lu, T.; Chen, F. Multiwfn: A Multifunctional Wavefunction Analyzer, *J. Comput. Chem.* **2012**, *33*, 580–592.
- [S5] Weigend F.; Ahlrichs R. Balanced basis sets of split valence, triple zeta valence and quadruple zeta valence quality for H to Rn: Design and assessment of accuracy. *Phys. Chem. Chem. Phys.* **2005**, *7*, 3297–305.
- [S6] Humphrey, W.; Dalke, A.; Schulten, K. VMD - Visual Molecular Dynamics. *J. Molec. Graphics* **1996**, *14*, 33–38.
- [S7] Chen Z.-X. *et al*, Interfering with Lactate-Fueled Respiration for Enhanced Photodynamic Tumor Therapy by a Porphyrinic MOF Nanoplatfrom *Adv. Funct. Mater.* **2018**, *28*,1803498.
- [S8] Satyam, K.; Ramarao, J.; Suresh, S., N-Heterocyclic carbene (NHC)-catalyzed intramolecular benzoin condensation–oxidation. *Org. & Biomol. Chem* **2021**, *19*, 1488.
- [S9] Nagpal, R. *et al*, Polyaromatic Hydrocarbon (PAH) Porphodimethene Conjugates: Conformational Features and Acid-Anion Binding Properties. *ChemistrySelect* **2019**, *4*, 8444.
- [S10] Taniguchi, N., Diarylation of Chalcogen Elements using Arylboronic acids via Copper- or Palladium-catalyzed Oxidative Coupling. *Tetrahedron* **2016**, *72*, 5818.

# Spectra ( $^1\text{H}$ NMR and $^{13}\text{C}$ NMR)

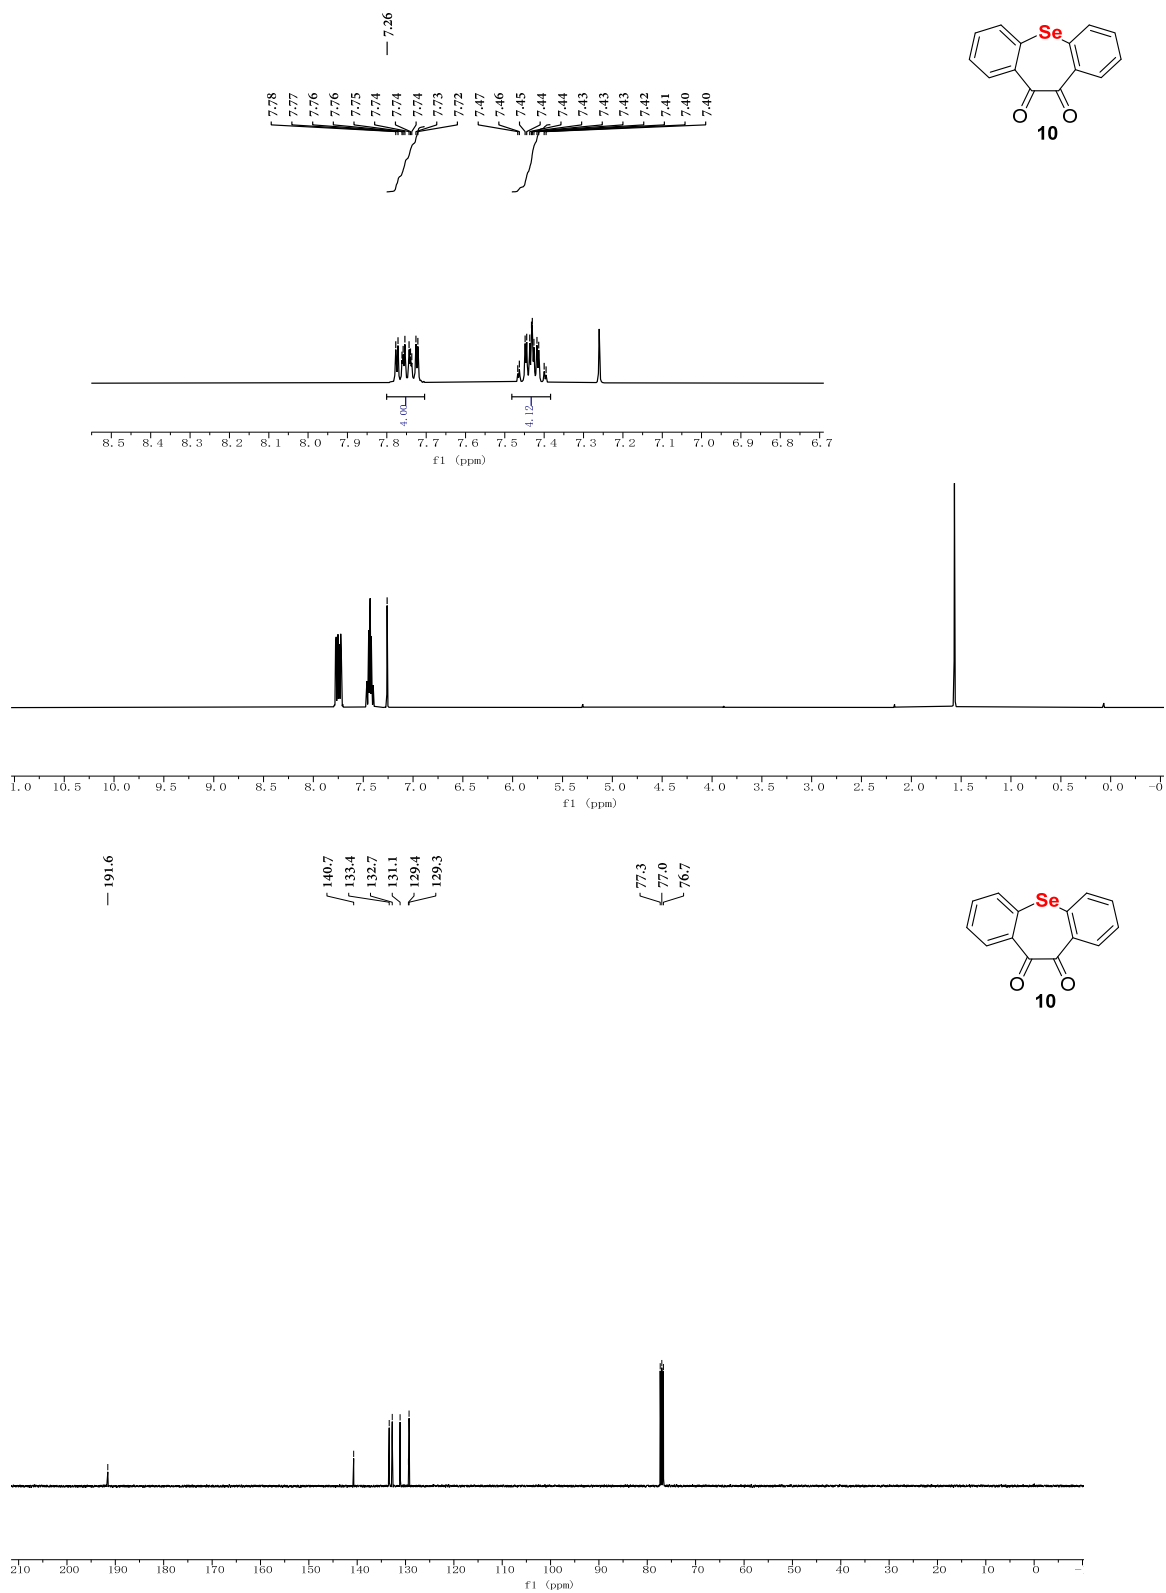

$^1\text{H}$  NMR (400 MHz, up) and  $^{13}\text{C}$  NMR (101 MHz, down) of **10** in  $\text{CDCl}_3$ .

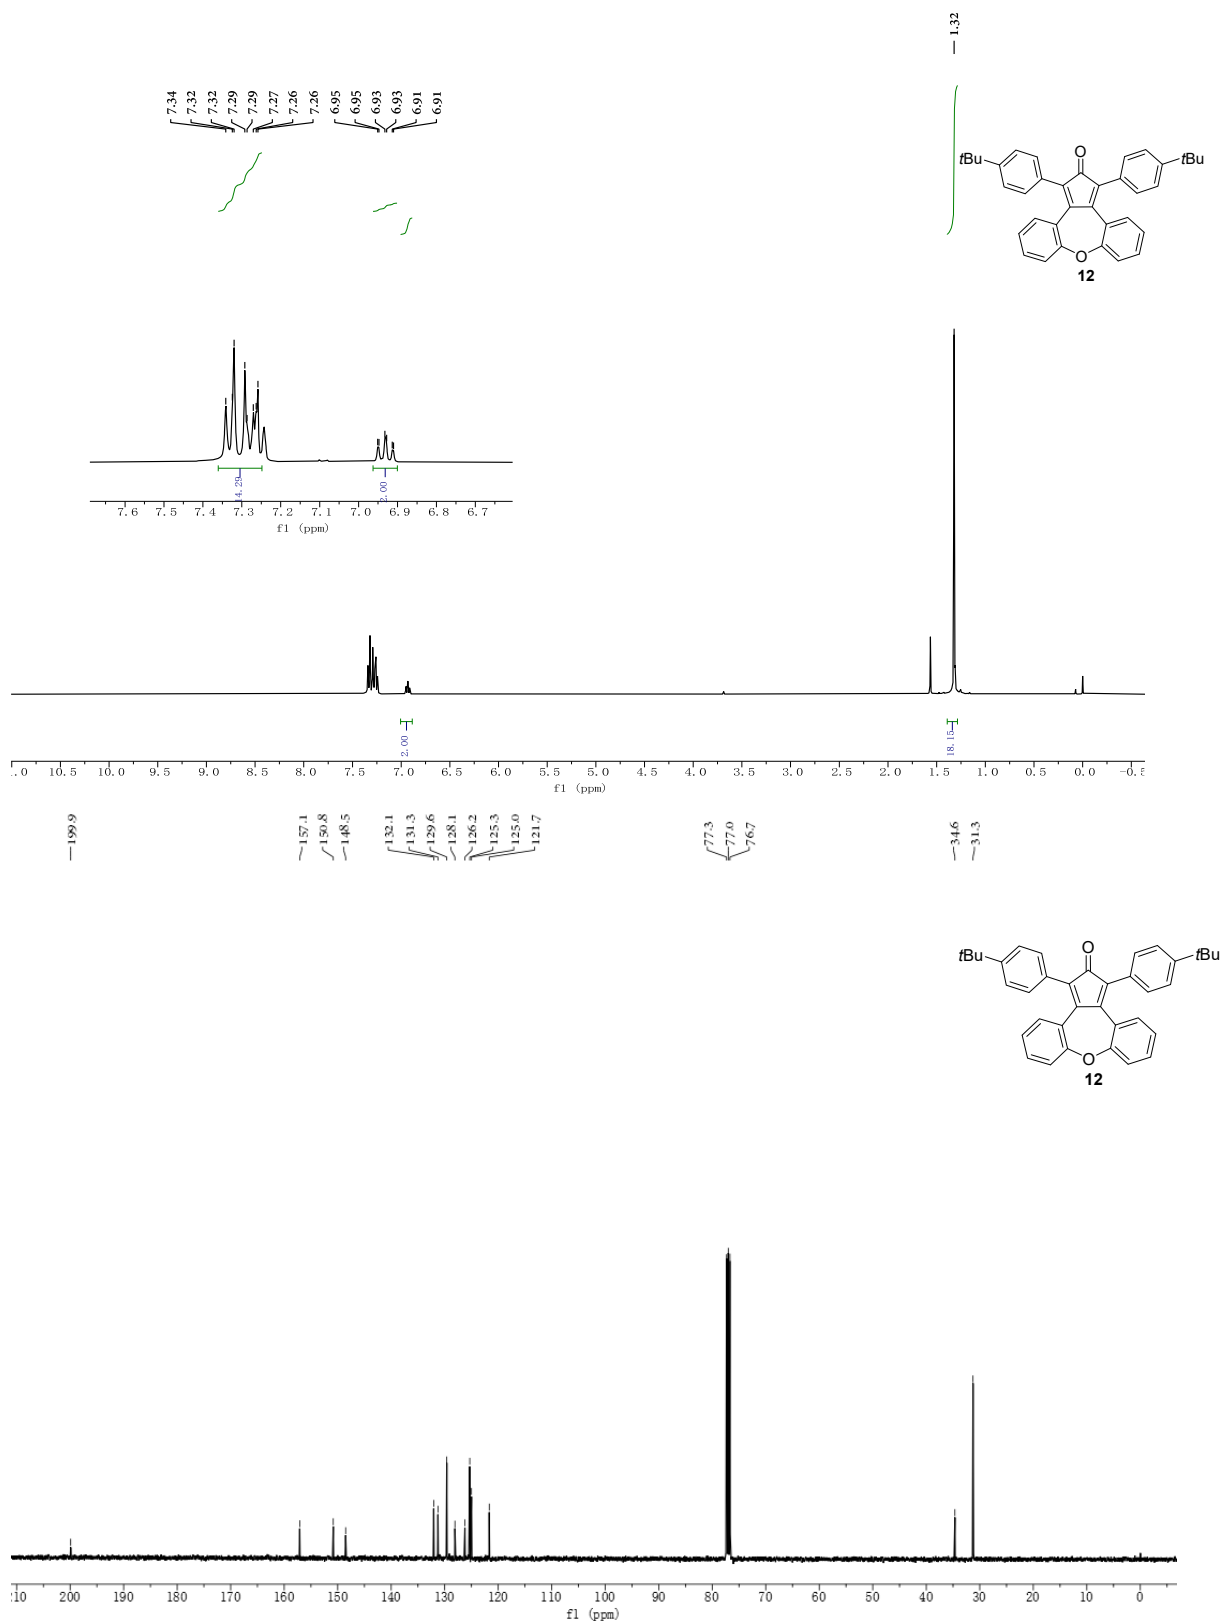

<sup>1</sup>H NMR (400 MHz, up) and <sup>13</sup>C NMR (101 MHz, down) of **12** in CDCl<sub>3</sub>.

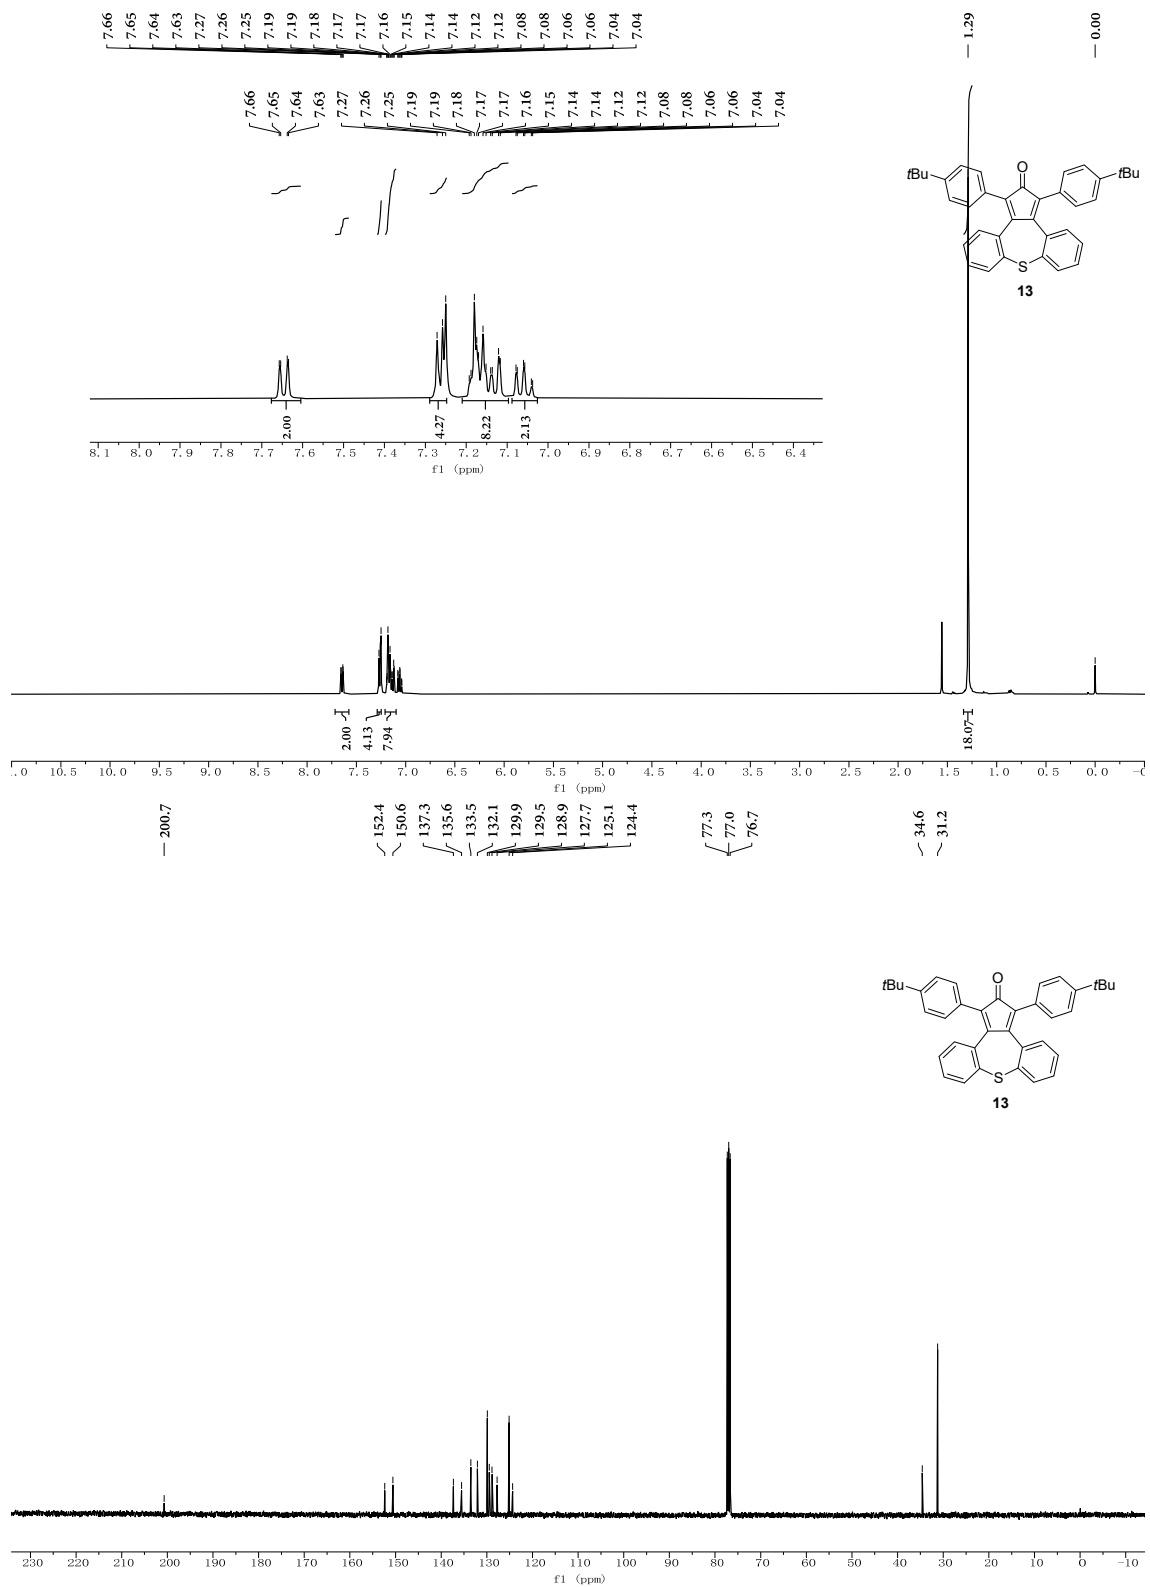

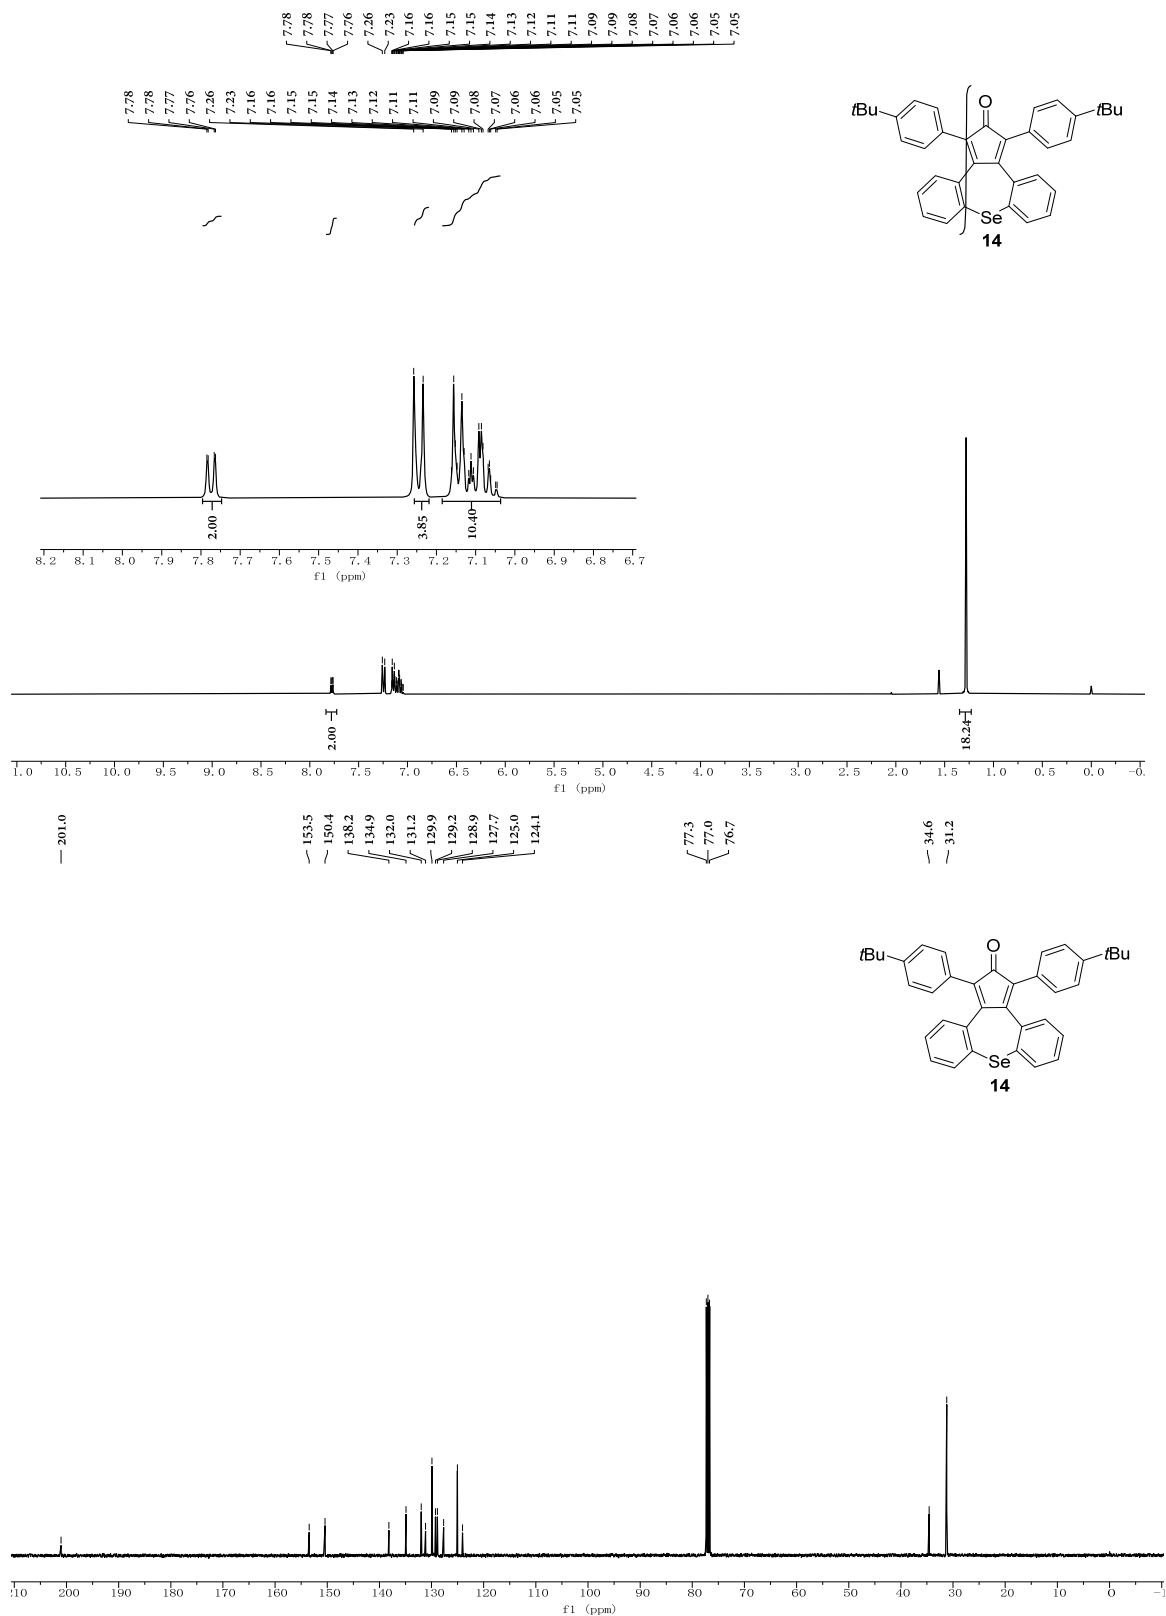

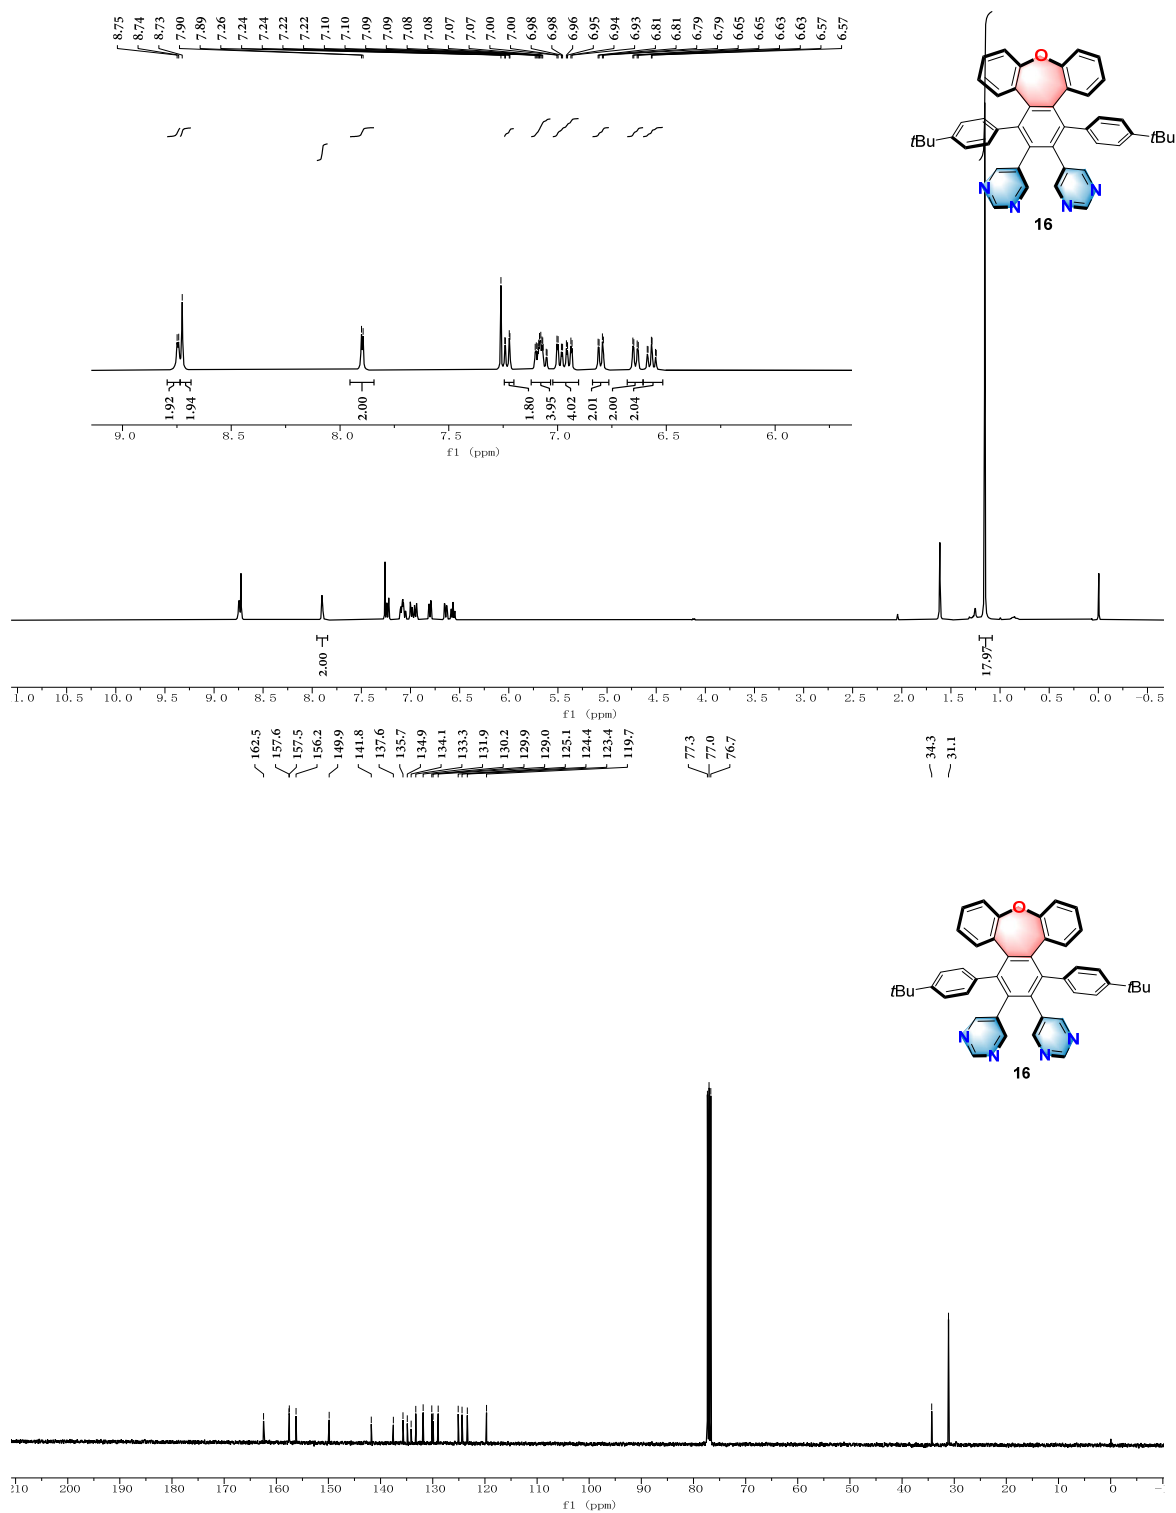

<sup>1</sup>H NMR (400 MHz, up) and <sup>13</sup>C NMR (101 MHz, down) of **16** in CDCl<sub>3</sub>.

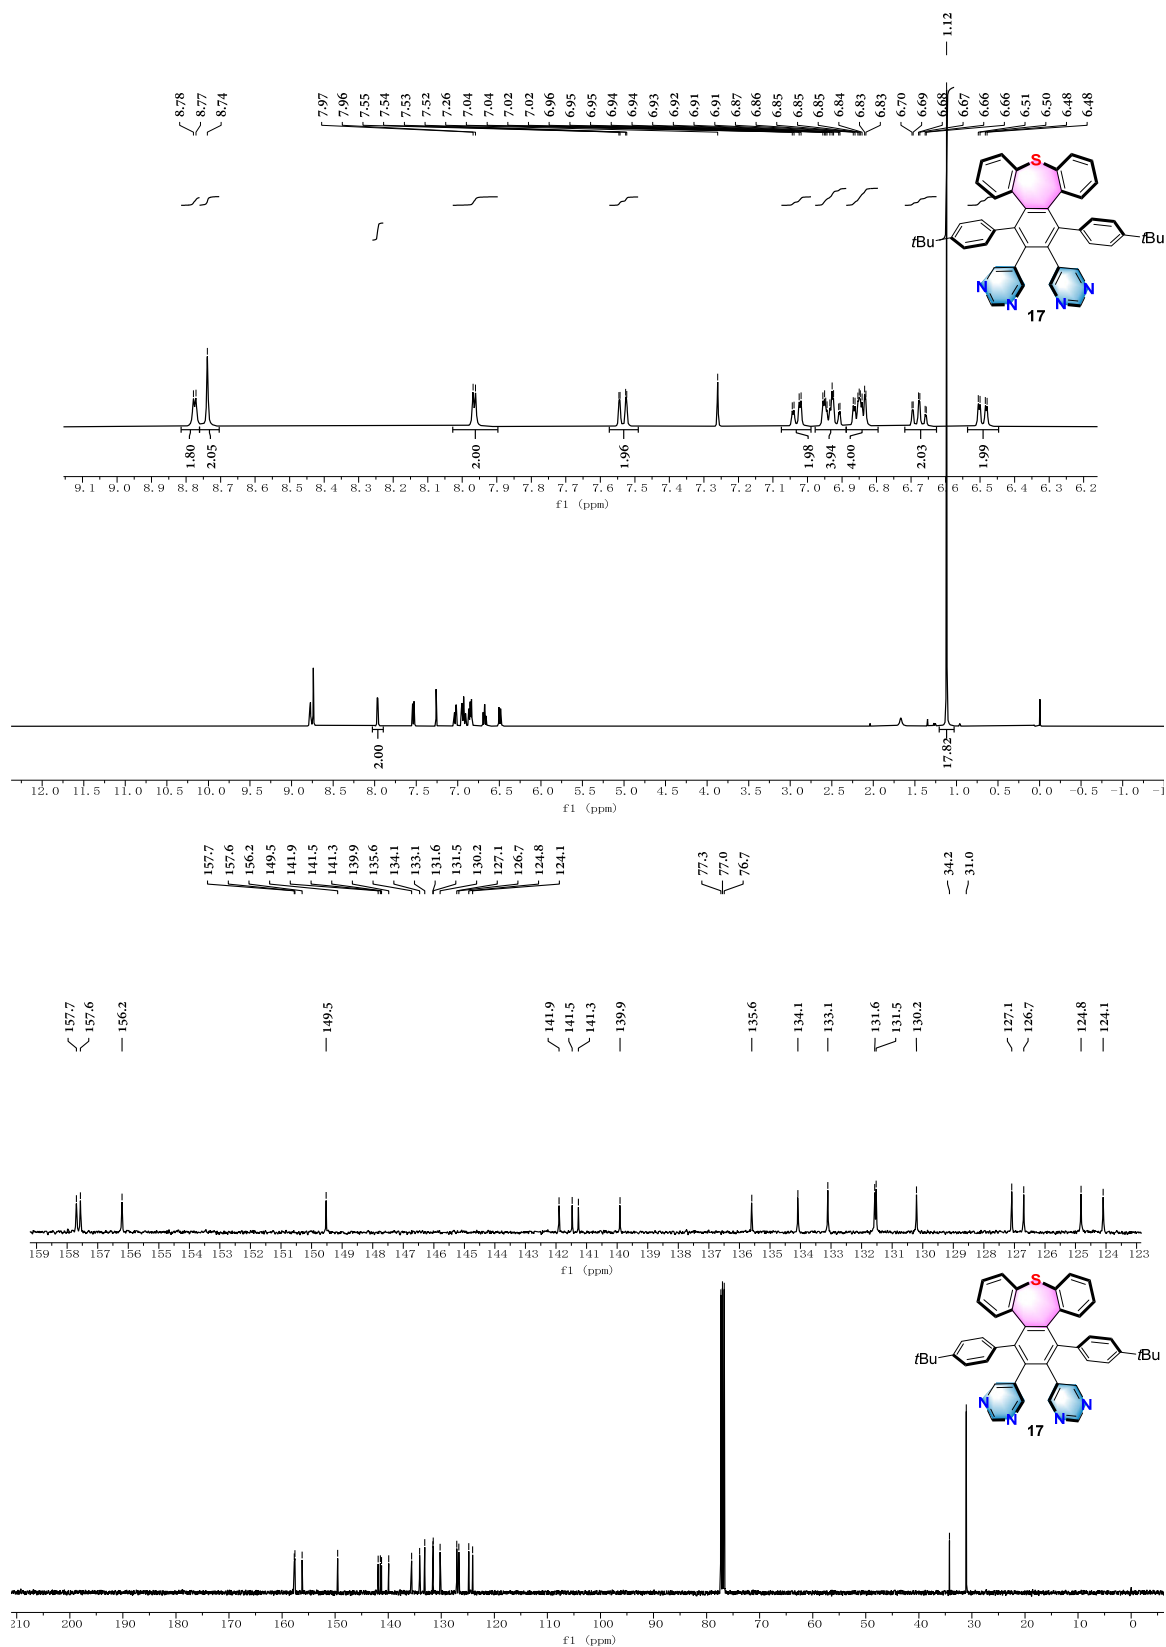

<sup>1</sup>H NMR (400 MHz, up) and <sup>13</sup>C NMR (101 MHz, down) of **17** in CDCl<sub>3</sub>.



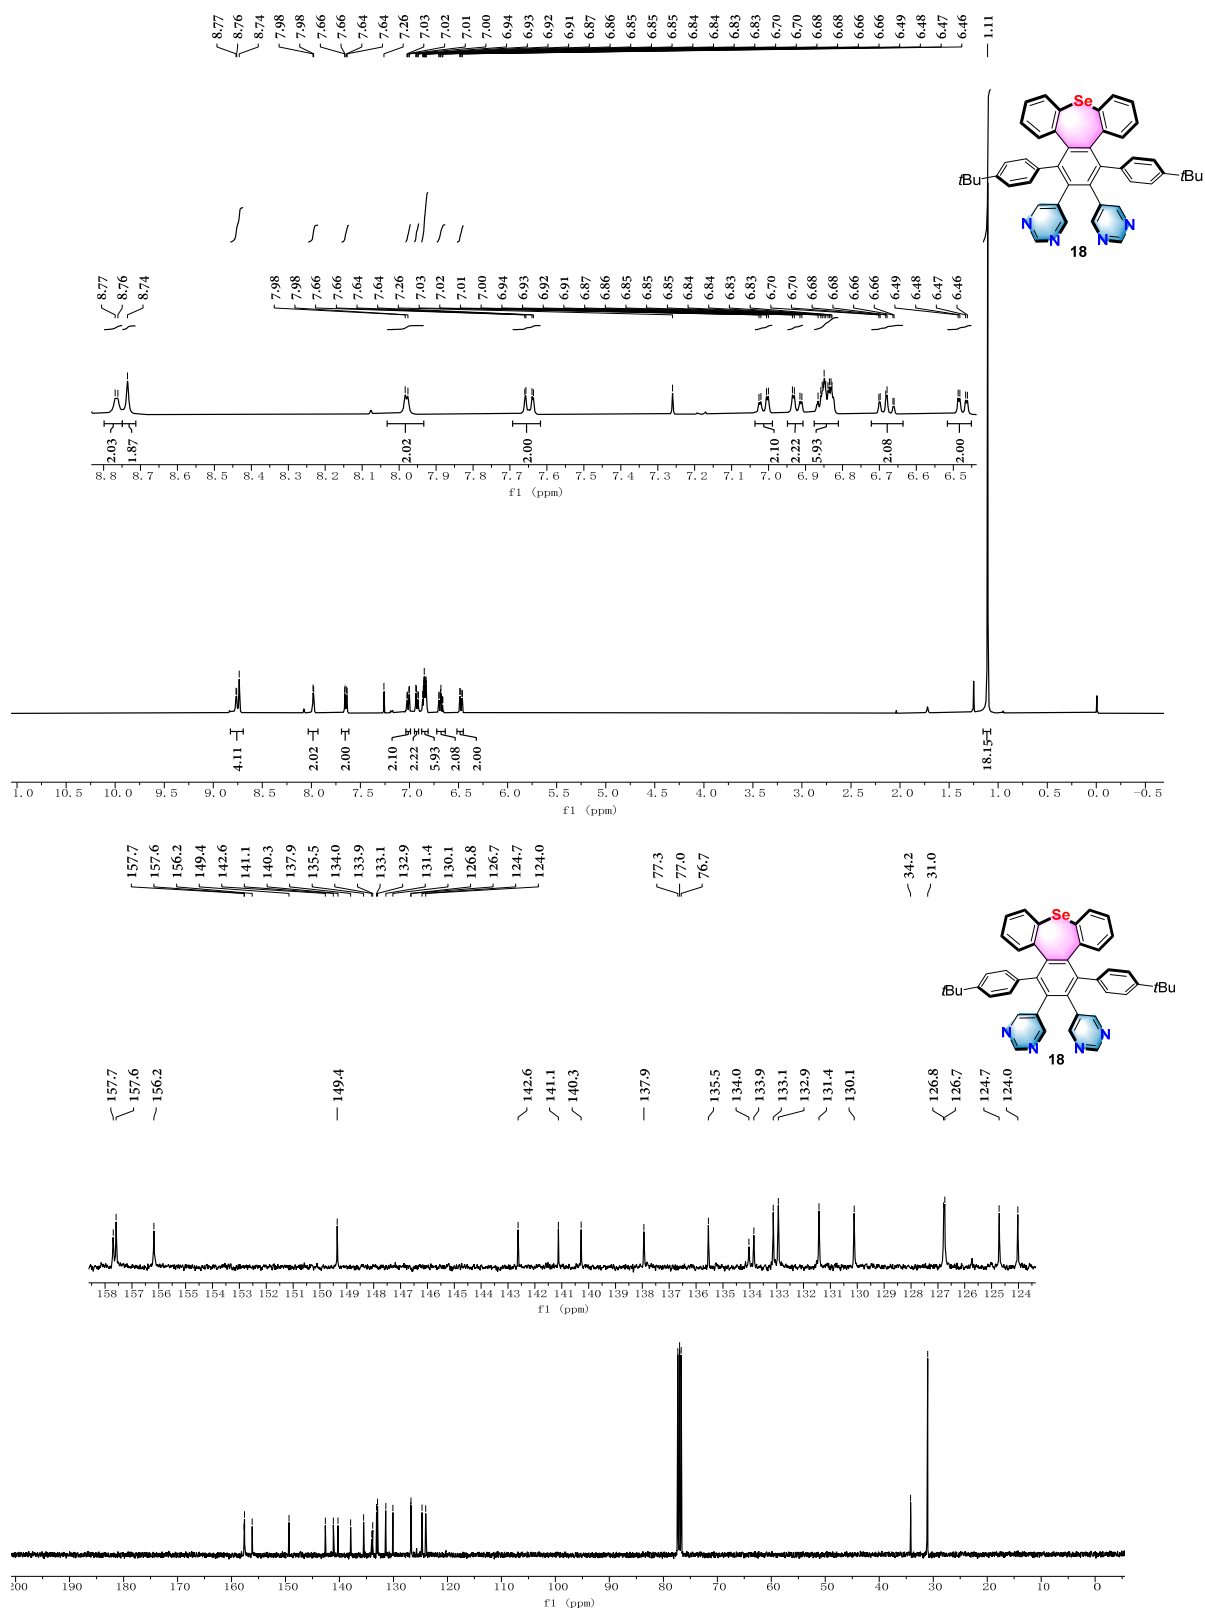

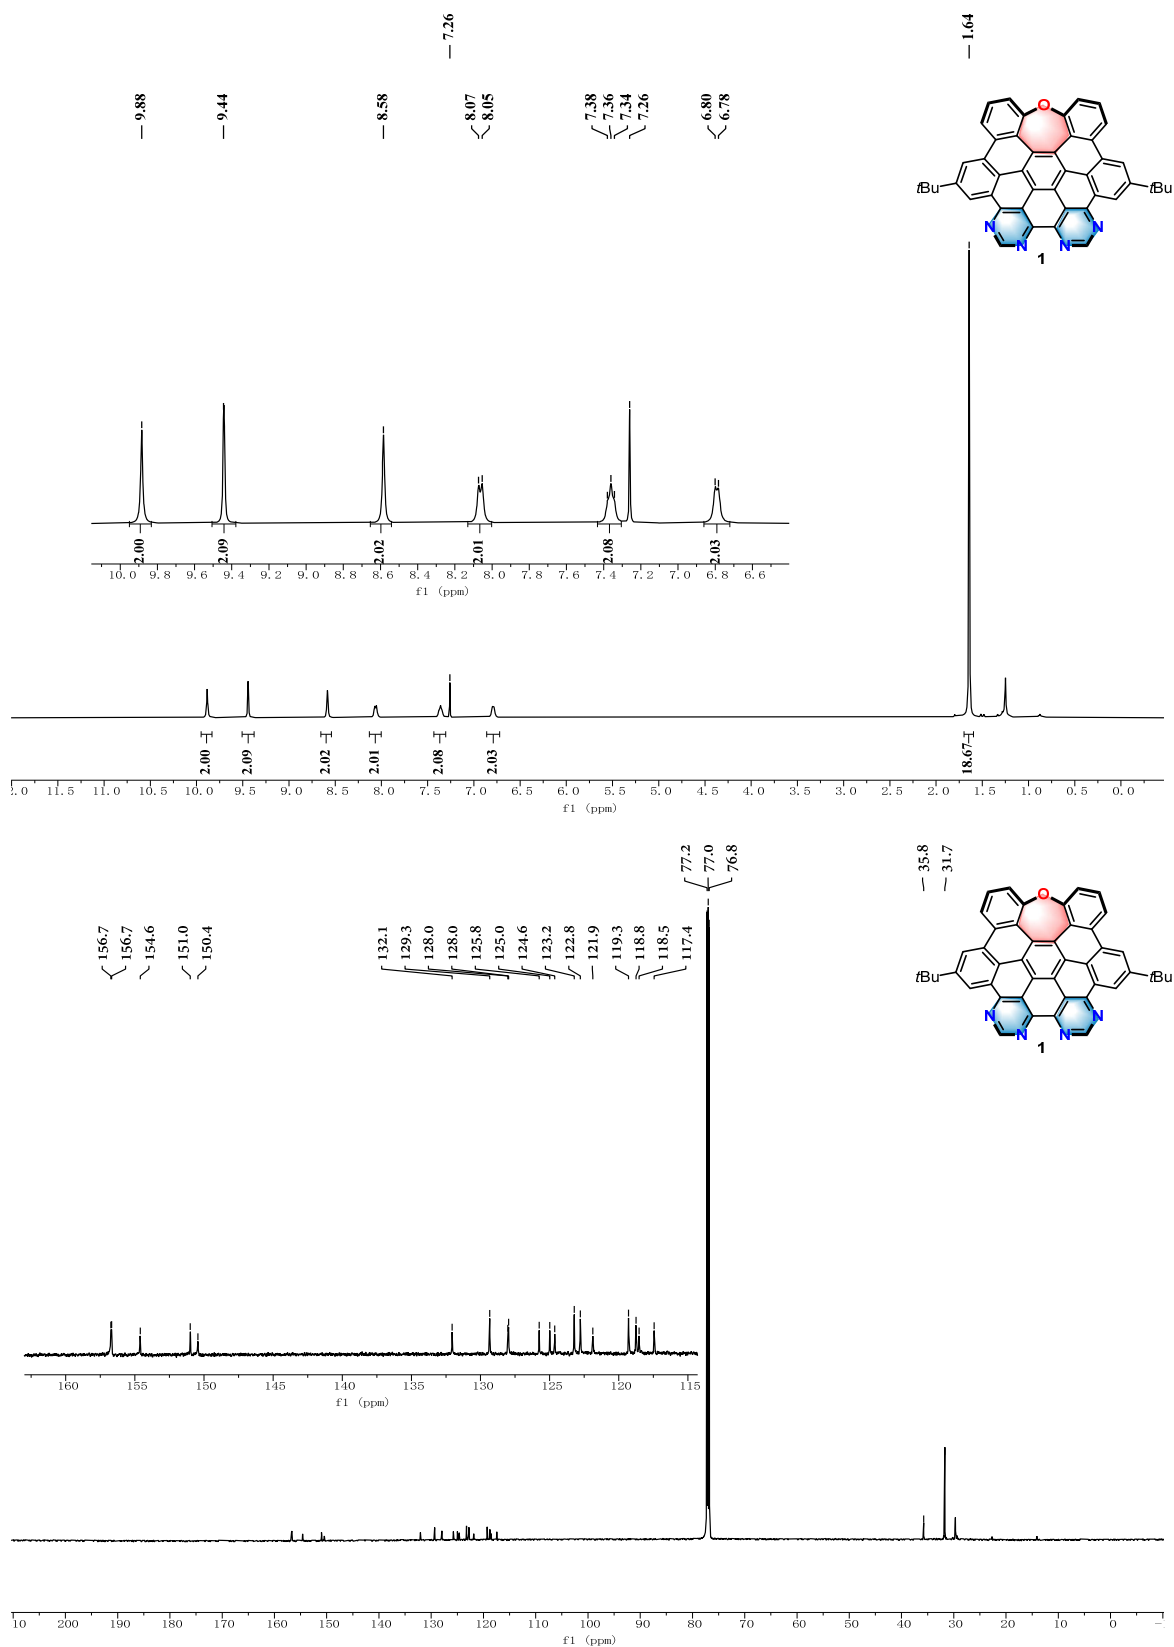

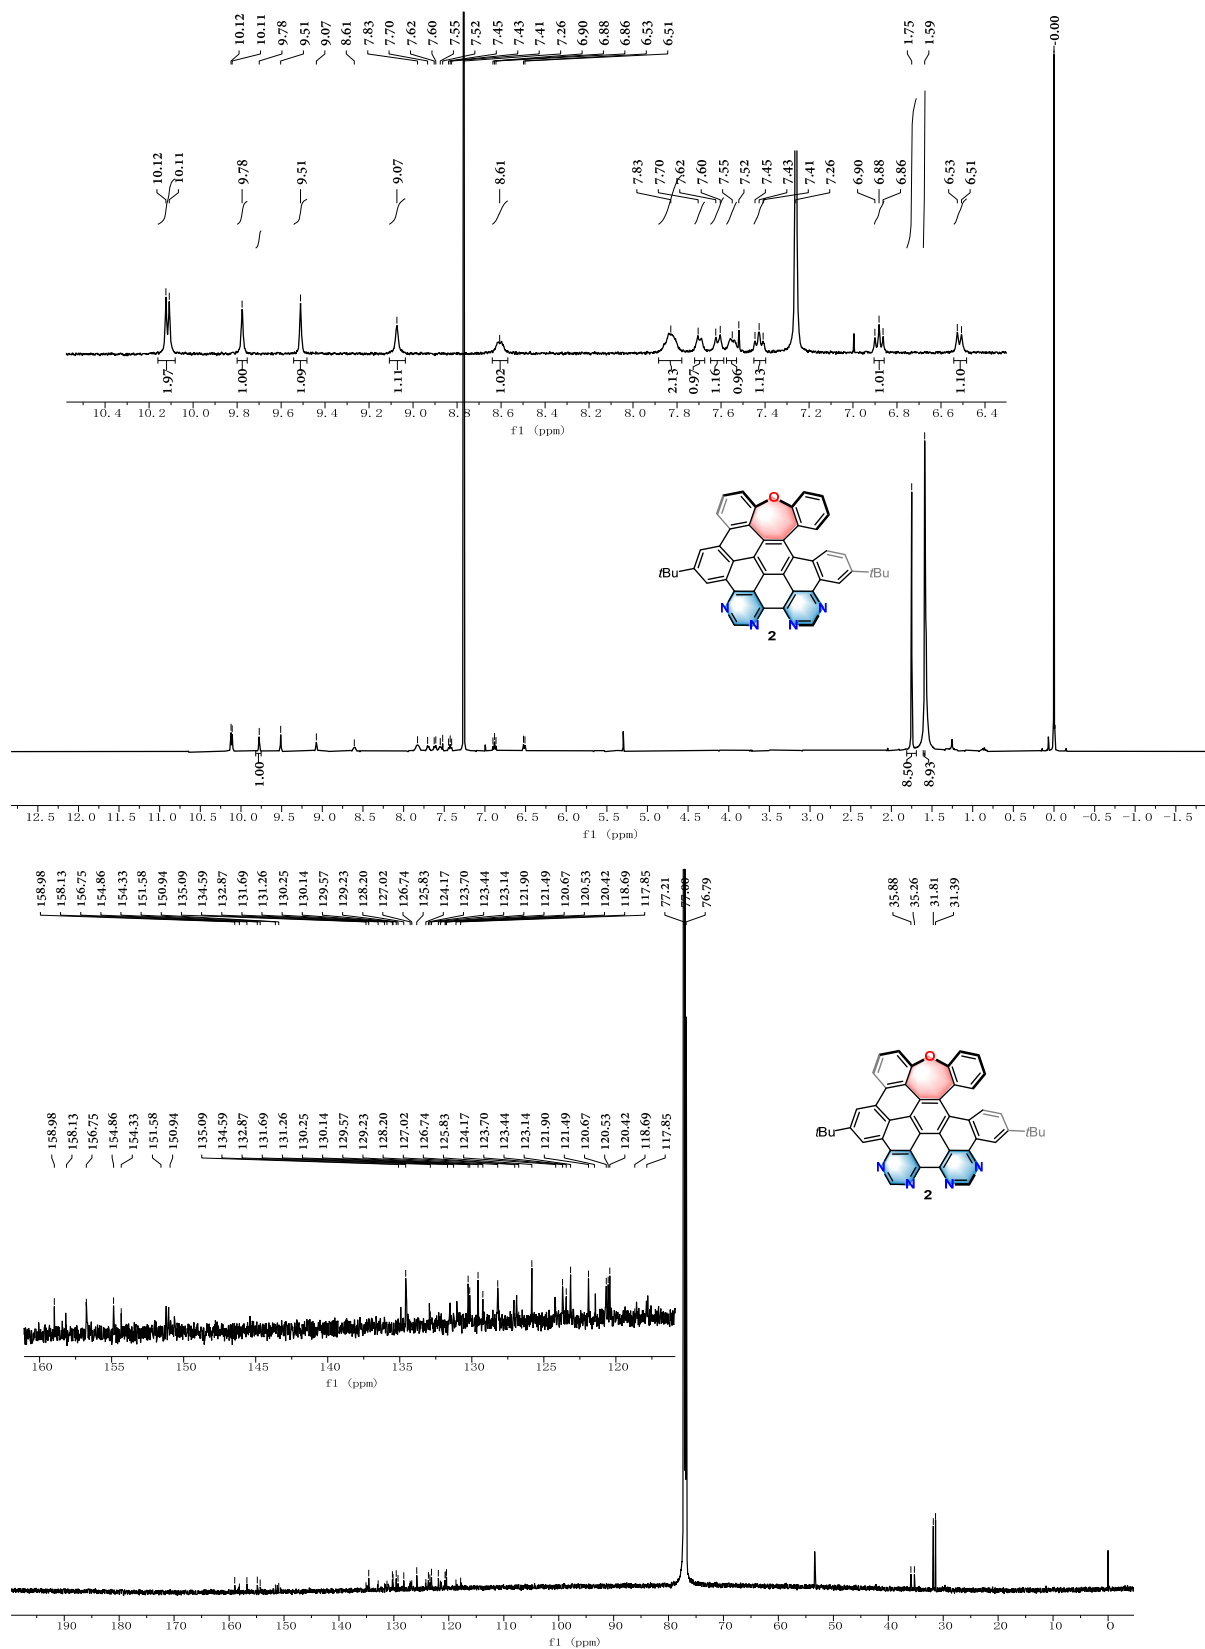

<sup>1</sup>H NMR (400 MHz, up) and <sup>13</sup>C NMR (151 MHz, down) of **2** in CDCl<sub>3</sub>.

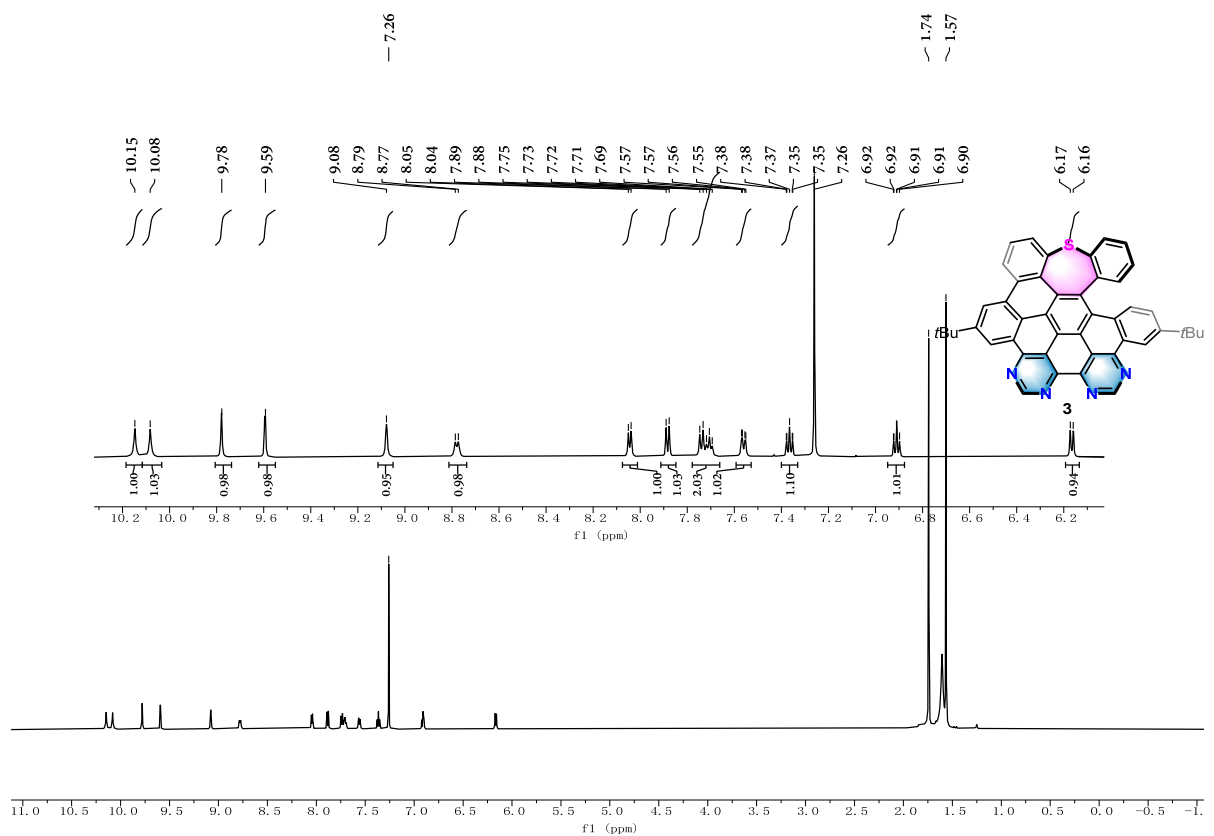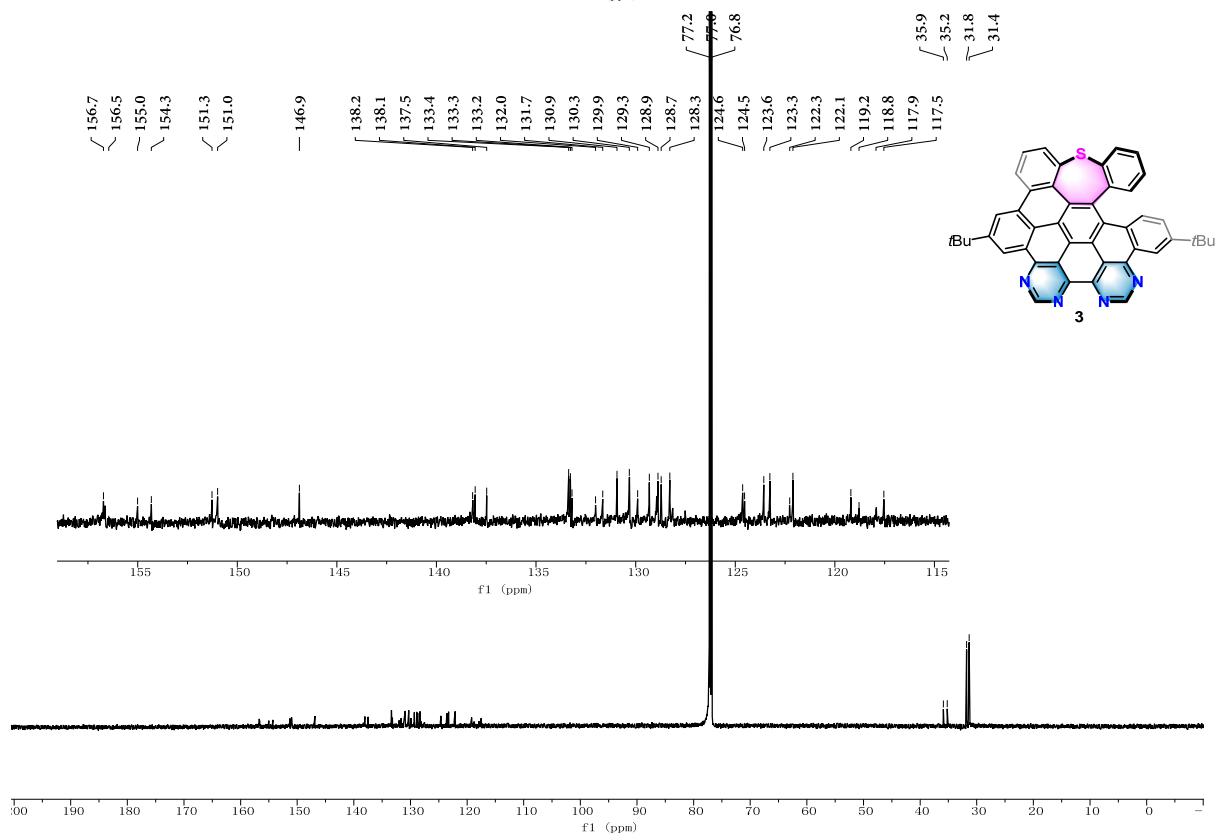

<sup>1</sup>H NMR (400 MHz, up) and <sup>13</sup>C NMR (151 MHz, down) of **3** in CDCl<sub>3</sub>.

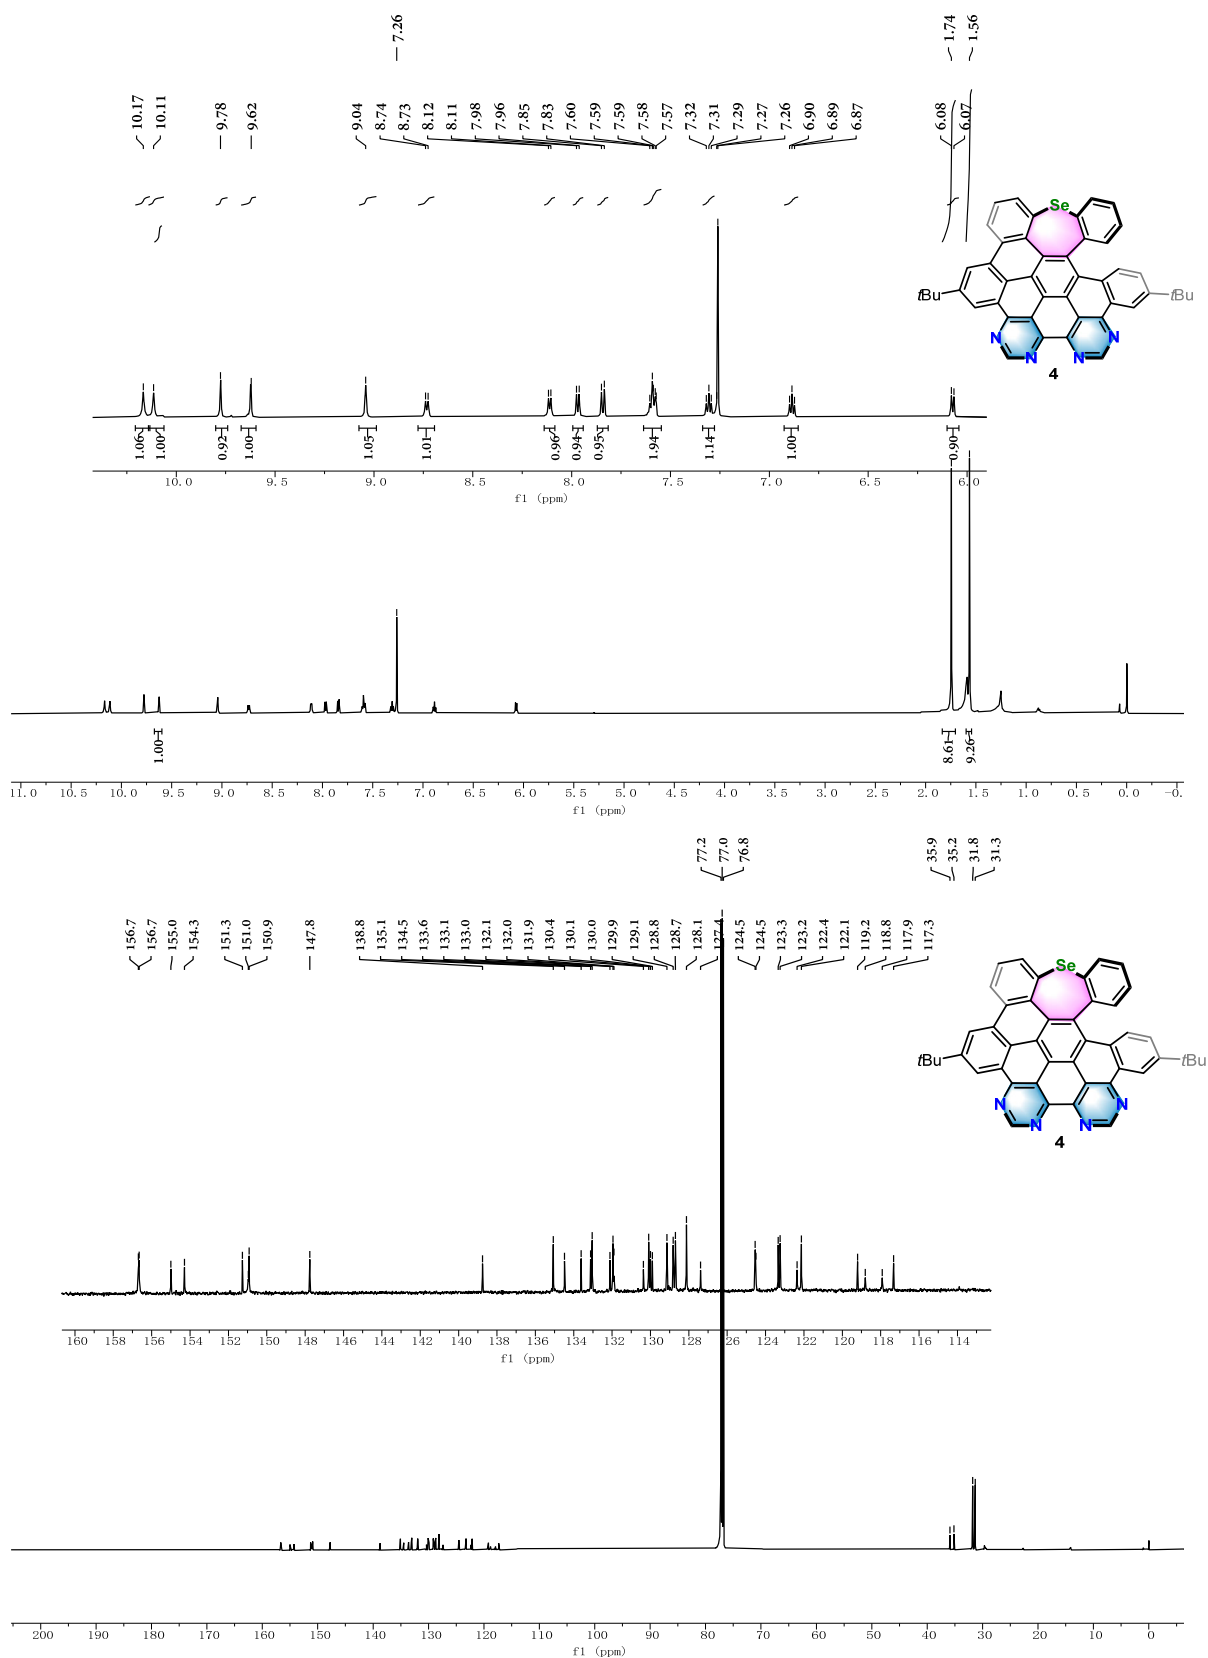

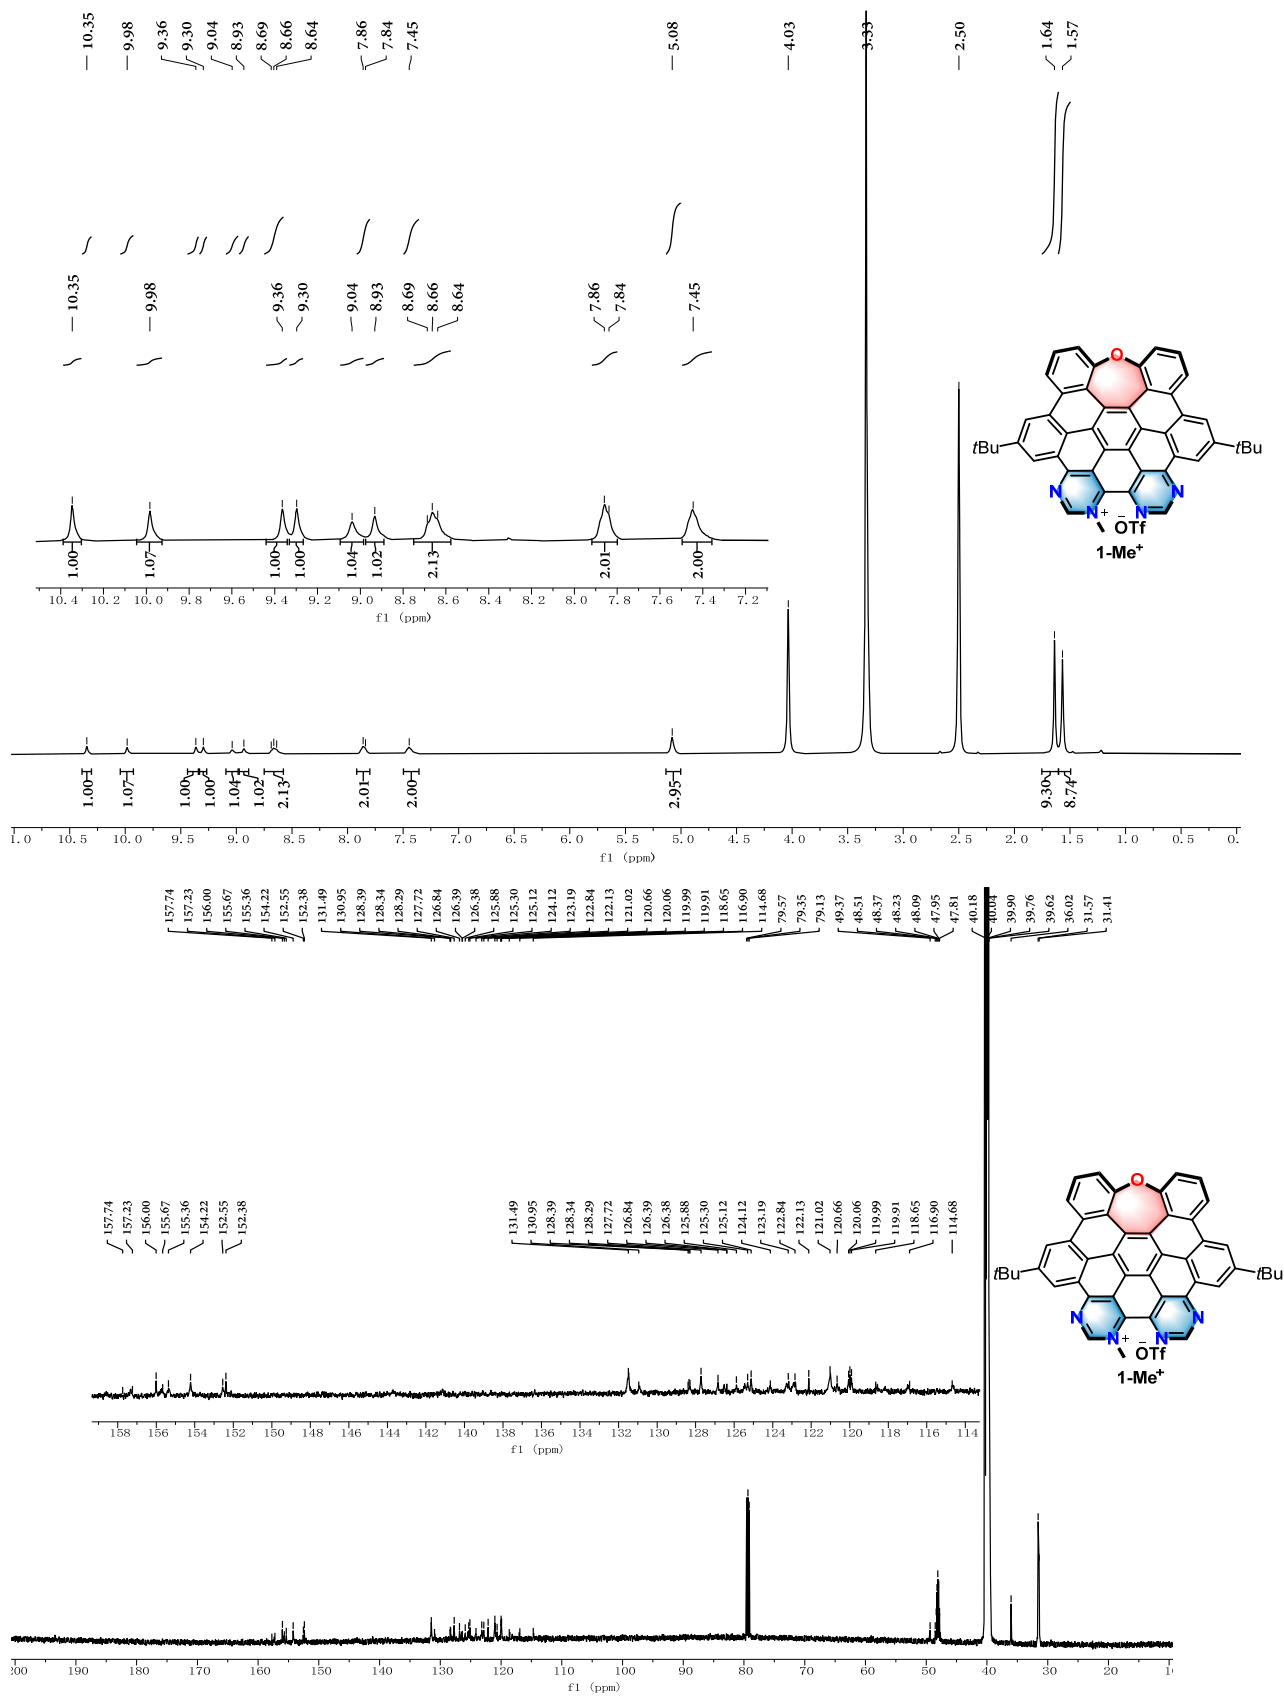

<sup>1</sup>H NMR (600 MHz, up) and <sup>13</sup>C NMR (151 MHz, down) of 1-Me<sup>+</sup> in DMSO-d<sub>6</sub>-CD<sub>3</sub>OD-CDCl<sub>3</sub> mixed solvents.

**Table S8.** Atomic coordinates and energies of NG 1.

|                                              |                             |
|----------------------------------------------|-----------------------------|
| Zero-point correction=                       | 0.642158 (Hartree/Particle) |
| Thermal correction to Energy=                | 0.678526                    |
| Thermal correction to Enthalpy=              | 0.679470                    |
| Thermal correction to Gibbs Free Energy=     | 0.576457                    |
| Sum of electronic and zero-point Energies=   | -2064.071855                |
| Sum of electronic and thermal Energies=      | -2064.035487                |
| Sum of electronic and thermal Enthalpies=    | -2064.034543                |
| Sum of electronic and thermal Free Energies= | -2064.137556                |

| Center<br>Number | Atomic<br>Number | Atomic<br>Type | Coordinates (Angstroms) |           |           |
|------------------|------------------|----------------|-------------------------|-----------|-----------|
|                  |                  |                | X                       | Y         | Z         |
| 1                | 8                | 0              | 0.000003                | 3.770437  | -1.704125 |
| 2                | 6                | 0              | 6.992449                | -0.338978 | 1.165395  |
| 3                | 6                | 0              | 5.535973                | -0.206925 | 0.711305  |
| 4                | 6                | 0              | 4.865883                | 1.005569  | 0.669039  |
| 5                | 1                | 0              | 5.398466                | 1.895819  | 0.960599  |
| 6                | 6                | 0              | 3.536995                | 1.123747  | 0.246732  |
| 7                | 6                | 0              | 2.820636                | -0.032581 | -0.092991 |
| 8                | 6                | 0              | 1.402829                | 0.038278  | -0.383151 |
| 9                | 6                | 0              | 0.695235                | -1.176426 | -0.494573 |
| 10               | 6                | 0              | -0.695236               | -1.176426 | -0.494550 |
| 11               | 6                | 0              | -1.392257               | -2.430289 | -0.562479 |
| 12               | 6                | 0              | -2.784809               | -2.491689 | -0.407638 |
| 13               | 6                | 0              | -3.503462               | -1.270497 | -0.070020 |
| 14               | 6                | 0              | -4.833166               | -1.339712 | 0.309703  |
| 15               | 1                | 0              | -5.298091               | -2.315958 | 0.301208  |
| 16               | 6                | 0              | -5.535969               | -0.206923 | 0.711315  |
| 17               | 6                | 0              | -6.992445               | -0.338978 | 1.165406  |
| 18               | 6                | 0              | 2.897715                | 2.420288  | 0.039262  |
| 19               | 6                | 0              | 3.633182                | 3.607279  | 0.175549  |
| 20               | 1                | 0              | 4.634961                | 3.576065  | 0.576237  |
| 21               | 6                | 0              | 3.134150                | 4.819310  | -0.239950 |
| 22               | 1                | 0              | 3.727402                | 5.719273  | -0.136270 |
| 23               | 6                | 0              | 1.891267                | 4.864326  | -0.856373 |
| 24               | 1                | 0              | 1.495741                | 5.775039  | -1.286255 |
| 25               | 6                | 0              | 1.152886                | 3.709038  | -0.961155 |
| 26               | 6                | 0              | -1.152884               | 3.709038  | -0.961162 |
| 27               | 6                | 0              | -1.891269               | 4.864324  | -0.856392 |
| 28               | 1                | 0              | -1.495743               | 5.775036  | -1.286278 |
| 29               | 6                | 0              | -3.134155               | 4.819309  | -0.239975 |
| 30               | 1                | 0              | -3.727410               | 5.719271  | -0.136305 |

|    |   |   |           |           |           |
|----|---|---|-----------|-----------|-----------|
| 31 | 6 | 0 | -3.633186 | 3.607280  | 0.175530  |
| 32 | 1 | 0 | -4.634967 | 3.576066  | 0.576213  |
| 33 | 6 | 0 | -2.897715 | 2.420290  | 0.039256  |
| 34 | 6 | 0 | -3.536994 | 1.123749  | 0.246727  |
| 35 | 6 | 0 | -4.865880 | 1.005572  | 0.669043  |
| 36 | 1 | 0 | -5.398461 | 1.895822  | 0.960605  |
| 37 | 6 | 0 | -2.715094 | -4.728899 | -0.764684 |
| 38 | 6 | 0 | -0.731149 | -3.653915 | -0.747254 |
| 39 | 6 | 0 | 0.731145  | -3.653917 | -0.747250 |
| 40 | 6 | 0 | 1.392254  | -2.430291 | -0.562471 |
| 41 | 6 | 0 | 2.784806  | -2.491692 | -0.407629 |
| 42 | 6 | 0 | 2.715089  | -4.728905 | -0.764657 |
| 43 | 6 | 0 | 3.503461  | -1.270500 | -0.070016 |
| 44 | 6 | 0 | 0.719540  | 1.271831  | -0.474265 |
| 45 | 6 | 0 | 1.570287  | 2.473655  | -0.447013 |
| 46 | 6 | 0 | -0.719536 | 1.271833  | -0.474242 |
| 47 | 6 | 0 | -1.402833 | 0.038280  | -0.383179 |
| 48 | 6 | 0 | -2.820634 | -0.032580 | -0.092988 |
| 49 | 6 | 0 | -1.570286 | 2.473656  | -0.447017 |
| 50 | 6 | 0 | 4.833167  | -1.339715 | 0.309700  |
| 51 | 1 | 0 | 5.298091  | -2.315962 | 0.301208  |
| 52 | 6 | 0 | -7.830229 | -0.925693 | 0.016521  |
| 53 | 1 | 0 | -8.872447 | -1.033649 | 0.327796  |
| 54 | 1 | 0 | -7.802838 | -0.273484 | -0.859449 |
| 55 | 1 | 0 | -7.469585 | -1.909634 | -0.287331 |
| 56 | 6 | 0 | -7.603469 | 1.006766  | 1.567805  |
| 57 | 1 | 0 | -7.618501 | 1.713279  | 0.734459  |
| 58 | 1 | 0 | -8.636770 | 0.855720  | 1.887004  |
| 59 | 1 | 0 | -7.066634 | 1.465420  | 2.401636  |
| 60 | 6 | 0 | -7.059634 | -1.281403 | 2.379411  |
| 61 | 1 | 0 | -6.474011 | -0.886945 | 3.213071  |
| 62 | 1 | 0 | -8.094526 | -1.392285 | 2.713276  |
| 63 | 1 | 0 | -6.677556 | -2.275529 | 2.142226  |
| 64 | 6 | 0 | 7.830245  | -0.925655 | 0.016497  |
| 65 | 1 | 0 | 7.802842  | -0.273428 | -0.859459 |
| 66 | 1 | 0 | 8.872464  | -1.033597 | 0.327772  |
| 67 | 1 | 0 | 7.469620  | -1.909596 | -0.287375 |
| 68 | 6 | 0 | 7.603456  | 1.006763  | 1.567828  |
| 69 | 1 | 0 | 8.636763  | 0.855724  | 1.887011  |
| 70 | 1 | 0 | 7.618466  | 1.713302  | 0.734504  |
| 71 | 1 | 0 | 7.066623  | 1.465383  | 2.401680  |
| 72 | 6 | 0 | 7.059643  | -1.281432 | 2.379377  |
| 73 | 1 | 0 | 8.094535  | -1.392317 | 2.713239  |



|    |   |   |           |           |           |
|----|---|---|-----------|-----------|-----------|
| 74 | 1 | 0 | 6.474018  | -0.886997 | 3.213047  |
| 75 | 1 | 0 | 6.677569  | -2.275554 | 2.142166  |
| 76 | 1 | 0 | 3.261944  | -5.659232 | -0.881678 |
| 77 | 1 | 0 | -3.261950 | -5.659225 | -0.881706 |
| 78 | 7 | 0 | 3.441499  | -3.644369 | -0.514182 |
| 79 | 7 | 0 | 1.398322  | -4.800515 | -0.866500 |
| 80 | 7 | 0 | -1.398327 | -4.800511 | -0.866515 |
| 81 | 7 | 0 | -3.441504 | -3.644364 | -0.514203 |

**Table S9.** Atomic coordinates and energies of NG 2.

|                                              |                             |
|----------------------------------------------|-----------------------------|
| Zero-point correction=                       | 0.666401 (Hartree/Particle) |
| Thermal correction to Energy=                | 0.703750                    |
| Thermal correction to Enthalpy=              | 0.704695                    |
| Thermal correction to Gibbs Free Energy=     | 0.599107                    |
| Sum of electronic and zero-point Energies=   | -2065.226012                |
| Sum of electronic and thermal Energies=      | -2065.188663                |
| Sum of electronic and thermal Enthalpies=    | -2065.187719                |
| Sum of electronic and thermal Free Energies= | -2065.293306                |

| Center<br>Number | Atomic<br>Number | Atomic<br>Type | Coordinates (Angstroms) |           |           |
|------------------|------------------|----------------|-------------------------|-----------|-----------|
|                  |                  |                | X                       | Y         | Z         |
| 1                | 6                | 0              | 1.403192                | 0.039591  | -0.200407 |
| 2                | 6                | 0              | 0.672043                | 1.234921  | -0.100563 |
| 3                | 6                | 0              | -0.729468               | 1.209451  | -0.062374 |
| 4                | 6                | 0              | -1.269827               | -2.403471 | 0.740719  |
| 5                | 6                | 0              | 0.670433                | 3.721192  | 0.012326  |
| 6                | 6                | 0              | -1.419032               | -0.017259 | -0.004049 |
| 7                | 6                | 0              | -0.661881               | -1.203834 | 0.110012  |
| 8                | 6                | 0              | 0.723201                | -1.199410 | -0.174175 |
| 9                | 6                | 0              | 1.354041                | 2.497484  | -0.059432 |
| 10               | 6                | 0              | -1.443820               | 2.453763  | 0.026771  |
| 11               | 6                | 0              | 2.846451                | 0.092712  | -0.189639 |
| 12               | 6                | 0              | -0.792285               | 3.696473  | 0.076030  |
| 13               | 6                | 0              | 1.504959                | -2.415815 | -0.440924 |
| 14               | 6                | 0              | 3.603295                | -1.089360 | -0.211819 |
| 15               | 6                | 0              | -2.845633               | 2.478722  | 0.117571  |
| 16               | 6                | 0              | -3.585771               | 1.229529  | 0.003219  |
| 17               | 6                | 0              | 3.525500                | 1.326916  | -0.088689 |
| 18               | 6                | 0              | -2.890235               | 0.013266  | -0.104485 |
| 19               | 6                | 0              | 2.756882                | 2.564009  | -0.065695 |
| 20               | 6                | 0              | 2.637501                | 4.827385  | 0.008737  |

|    |   |   |           |           |           |
|----|---|---|-----------|-----------|-----------|
| 21 | 6 | 0 | 4.907023  | 1.364730  | 0.019588  |
| 22 | 1 | 0 | 5.369282  | 2.339165  | 0.097099  |
| 23 | 6 | 0 | -2.781172 | 4.740586  | 0.286978  |
| 24 | 6 | 0 | 2.919116  | -2.362772 | -0.449617 |
| 25 | 6 | 0 | 4.990637  | -1.008067 | -0.063429 |
| 26 | 1 | 0 | 5.561678  | -1.921879 | -0.031968 |
| 27 | 6 | 0 | -1.943989 | -2.301849 | 1.959387  |
| 28 | 1 | 0 | -2.034879 | -1.332499 | 2.433499  |
| 29 | 6 | 0 | 5.665852  | 0.199276  | 0.054547  |
| 30 | 6 | 0 | -5.735765 | 0.143650  | -0.337125 |
| 31 | 6 | 0 | -4.984730 | 1.272765  | -0.087791 |
| 32 | 1 | 0 | -5.444568 | 2.243236  | 0.022772  |
| 33 | 6 | 0 | 0.914679  | -3.630952 | -0.851899 |
| 34 | 6 | 0 | -5.028602 | -1.053730 | -0.533128 |
| 35 | 1 | 0 | -5.563389 | -1.960783 | -0.787751 |
| 36 | 6 | 0 | -3.660218 | -1.119164 | -0.423143 |
| 37 | 1 | 0 | -3.178369 | -2.065564 | -0.609725 |
| 38 | 6 | 0 | 7.186151  | 0.289168  | 0.218444  |
| 39 | 6 | 0 | 3.657802  | -3.504811 | -0.786884 |
| 40 | 1 | 0 | 4.736116  | -3.459316 | -0.813512 |
| 41 | 6 | 0 | -1.144327 | -3.659484 | 0.176242  |
| 42 | 6 | 0 | 3.041842  | -4.681903 | -1.143256 |
| 43 | 1 | 0 | 3.633490  | -5.547461 | -1.414488 |
| 44 | 6 | 0 | 1.656813  | -4.740585 | -1.188467 |
| 45 | 1 | 0 | 1.131625  | -5.632374 | -1.503908 |
| 46 | 6 | 0 | -2.507633 | -3.419321 | 2.551962  |
| 47 | 1 | 0 | -3.032011 | -3.320658 | 3.494307  |
| 48 | 6 | 0 | -1.711327 | -4.787553 | 0.743948  |
| 49 | 1 | 0 | -1.600475 | -5.742559 | 0.246358  |
| 50 | 6 | 0 | -7.261768 | 0.158290  | -0.438502 |
| 51 | 6 | 0 | -2.405996 | -4.662244 | 1.937274  |
| 52 | 1 | 0 | -2.856430 | -5.535196 | 2.393583  |
| 53 | 6 | 0 | 7.854993  | -1.088802 | 0.237953  |
| 54 | 1 | 0 | 8.933378  | -0.967382 | 0.359457  |
| 55 | 1 | 0 | 7.690237  | -1.635272 | -0.693778 |
| 56 | 1 | 0 | 7.499035  | -1.703666 | 1.068004  |
| 57 | 6 | 0 | 7.511541  | 1.001542  | 1.542473  |
| 58 | 1 | 0 | 7.106474  | 0.448703  | 2.393254  |
| 59 | 1 | 0 | 7.098531  | 2.011027  | 1.571569  |
| 60 | 1 | 0 | 8.594087  | 1.079615  | 1.672074  |
| 61 | 6 | 0 | -7.686314 | -0.306807 | -1.842015 |
| 62 | 1 | 0 | -7.283292 | 0.356388  | -2.610702 |
| 63 | 1 | 0 | -8.776143 | -0.302358 | -1.926399 |

|    |   |   |           |           |           |
|----|---|---|-----------|-----------|-----------|
| 64 | 1 | 0 | -7.340809 | -1.319342 | -2.058109 |
| 65 | 6 | 0 | 7.774552  | 1.094563  | -0.952552 |
| 66 | 1 | 0 | 8.859566  | 1.174431  | -0.846932 |
| 67 | 1 | 0 | 7.368261  | 2.106354  | -0.993553 |
| 68 | 1 | 0 | 7.560781  | 0.608598  | -1.907351 |
| 69 | 6 | 0 | -7.847099 | -0.798240 | 0.614574  |
| 70 | 1 | 0 | -7.498858 | -1.822781 | 0.471326  |
| 71 | 1 | 0 | -8.938423 | -0.805070 | 0.552574  |
| 72 | 1 | 0 | -7.566121 | -0.486386 | 1.623129  |
| 73 | 6 | 0 | -7.842464 | 1.554651  | -0.197069 |
| 74 | 1 | 0 | -7.586832 | 1.934360  | 0.794529  |
| 75 | 1 | 0 | -8.931772 | 1.513609  | -0.265933 |
| 76 | 1 | 0 | -7.491371 | 2.274820  | -0.939143 |
| 77 | 7 | 0 | 3.391069  | 3.735151  | -0.032544 |
| 78 | 7 | 0 | 1.315447  | 4.884825  | 0.040261  |
| 79 | 7 | 0 | -1.464231 | 4.838442  | 0.203006  |
| 80 | 7 | 0 | -3.505290 | 3.628720  | 0.251658  |
| 81 | 1 | 0 | 3.163824  | 5.776649  | 0.023640  |
| 82 | 1 | 0 | -3.329879 | 5.670766  | 0.397199  |
| 83 | 8 | 0 | -0.450823 | -3.760293 | -1.012192 |

**Table S10.** Atomic coordinates and energies of NG 3.

|                                              |                             |
|----------------------------------------------|-----------------------------|
| Zero-point correction=                       | 0.663553 (Hartree/Particle) |
| Thermal correction to Energy=                | 0.701546                    |
| Thermal correction to Enthalpy=              | 0.702490                    |
| Thermal correction to Gibbs Free Energy=     | 0.595287                    |
| Sum of electronic and zero-point Energies=   | -2388.213020                |
| Sum of electronic and thermal Energies=      | -2388.175027                |
| Sum of electronic and thermal Enthalpies=    | -2388.174083                |
| Sum of electronic and thermal Free Energies= | -2388.281287                |

| Center Number | Atomic Number | Atomic Type | Coordinates (Angstroms) |           |           |
|---------------|---------------|-------------|-------------------------|-----------|-----------|
|               |               |             | X                       | Y         | Z         |
| 1             | 16            | 0           | -0.757773               | -3.735997 | -1.457523 |
| 2             | 6             | 0           | 1.430852                | 0.098943  | -0.261510 |
| 3             | 6             | 0           | 0.706015                | 1.299801  | -0.195222 |
| 4             | 6             | 0           | -0.696071               | 1.283308  | -0.147111 |
| 5             | 6             | 0           | -1.245361               | -2.299727 | 0.775424  |
| 6             | 6             | 0           | 0.722479                | 3.789544  | -0.171541 |
| 7             | 6             | 0           | -1.390547               | 0.062171  | -0.034359 |
| 8             | 6             | 0           | -0.636497               | -1.130892 | 0.072631  |
| 9             | 6             | 0           | 0.745071                | -1.139455 | -0.237041 |
| 10            | 6             | 0           | 1.396958                | 2.559433  | -0.187881 |

|    |   |   |           |           |           |
|----|---|---|-----------|-----------|-----------|
| 11 | 6 | 0 | -1.399147 | 2.537055  | -0.091730 |
| 12 | 6 | 0 | 2.873590  | 0.146840  | -0.199247 |
| 13 | 6 | 0 | -0.739448 | 3.776802  | -0.105026 |
| 14 | 6 | 0 | 1.529314  | -2.356534 | -0.517513 |
| 15 | 6 | 0 | 3.619513  | -1.039500 | -0.138114 |
| 16 | 6 | 0 | -2.797359 | 2.577976  | 0.031115  |
| 17 | 6 | 0 | -3.547959 | 1.331414  | 0.011800  |
| 18 | 6 | 0 | 3.557929  | 1.377842  | -0.106038 |
| 19 | 6 | 0 | -2.866868 | 0.103409  | -0.064390 |
| 20 | 6 | 0 | 2.799766  | 2.618710  | -0.167495 |
| 21 | 6 | 0 | 2.696180  | 4.883335  | -0.199189 |
| 22 | 6 | 0 | 4.931050  | 1.410045  | 0.082340  |
| 23 | 1 | 0 | 5.397368  | 2.383407  | 0.148039  |
| 24 | 6 | 0 | -2.717195 | 4.845162  | 0.083616  |
| 25 | 6 | 0 | 2.941282  | -2.308545 | -0.413540 |
| 26 | 6 | 0 | 4.994538  | -0.964315 | 0.099946  |
| 27 | 1 | 0 | 5.553672  | -1.880237 | 0.202673  |
| 28 | 6 | 0 | -1.679883 | -2.129573 | 2.090215  |
| 29 | 1 | 0 | -1.560687 | -1.164273 | 2.566902  |
| 30 | 6 | 0 | 5.673505  | 0.241389  | 0.215074  |
| 31 | 6 | 0 | -5.724971 | 0.257642  | -0.156298 |
| 32 | 6 | 0 | -4.949154 | 1.387769  | -0.011378 |
| 33 | 1 | 0 | -5.391599 | 2.369222  | 0.067639  |
| 34 | 6 | 0 | 0.965187  | -3.553660 | -1.029705 |
| 35 | 6 | 0 | -5.040100 | -0.956751 | -0.316369 |
| 36 | 1 | 0 | -5.594960 | -1.871465 | -0.487150 |
| 37 | 6 | 0 | -3.668236 | -1.032734 | -0.274542 |
| 38 | 1 | 0 | -3.212843 | -1.995314 | -0.429995 |
| 39 | 6 | 0 | 7.180467  | 0.325633  | 0.476099  |
| 40 | 6 | 0 | 3.703446  | -3.448062 | -0.701670 |
| 41 | 1 | 0 | 4.780051  | -3.404327 | -0.632588 |
| 42 | 6 | 0 | -1.389203 | -3.551245 | 0.189943  |
| 43 | 6 | 0 | 3.121494  | -4.617077 | -1.127912 |
| 44 | 1 | 0 | 3.730537  | -5.484076 | -1.352151 |
| 45 | 6 | 0 | 1.747981  | -4.659308 | -1.312267 |
| 46 | 1 | 0 | 1.271328  | -5.553778 | -1.690706 |
| 47 | 6 | 0 | -2.279232 | -3.173163 | 2.777809  |
| 48 | 1 | 0 | -2.618478 | -3.020412 | 3.795116  |
| 49 | 6 | 0 | -1.991150 | -4.601751 | 0.869902  |
| 50 | 1 | 0 | -2.090649 | -5.564511 | 0.384388  |
| 51 | 6 | 0 | -7.253736 | 0.287200  | -0.180068 |
| 52 | 6 | 0 | -2.449567 | -4.407535 | 2.164564  |
| 53 | 1 | 0 | -2.923977 | -5.222122 | 2.698194  |

|    |   |   |           |           |           |
|----|---|---|-----------|-----------|-----------|
| 54 | 6 | 0 | 7.832087  | -1.055719 | 0.593621  |
| 55 | 1 | 0 | 8.901181  | -0.938133 | 0.782374  |
| 56 | 1 | 0 | 7.724301  | -1.637014 | -0.325298 |
| 57 | 1 | 0 | 7.415193  | -1.634775 | 1.421066  |
| 58 | 6 | 0 | 7.424619  | 1.086925  | 1.790340  |
| 59 | 1 | 0 | 6.958349  | 0.571036  | 2.632953  |
| 60 | 1 | 0 | 7.020798  | 2.099836  | 1.752611  |
| 61 | 1 | 0 | 8.496904  | 1.161865  | 1.988792  |
| 62 | 6 | 0 | -7.755271 | -0.253608 | -1.530009 |
| 63 | 1 | 0 | -7.385854 | 0.357932  | -2.356248 |
| 64 | 1 | 0 | -8.847920 | -0.239672 | -1.558654 |
| 65 | 1 | 0 | -7.431682 | -1.281547 | -1.703086 |
| 66 | 6 | 0 | 7.853718  | 1.079739  | -0.683256 |
| 67 | 1 | 0 | 8.930025  | 1.155563  | -0.508343 |
| 68 | 1 | 0 | 7.461358  | 2.092146  | -0.790744 |
| 69 | 1 | 0 | 7.699165  | 0.558148  | -1.630648 |
| 70 | 6 | 0 | -7.793877 | -0.597907 | 0.956281  |
| 71 | 1 | 0 | -7.464776 | -1.633815 | 0.855880  |
| 72 | 1 | 0 | -8.886977 | -0.593045 | 0.950954  |
| 73 | 1 | 0 | -7.457186 | -0.231837 | 1.928902  |
| 74 | 6 | 0 | -7.805957 | 1.703233  | 0.007485  |
| 75 | 1 | 0 | -7.495970 | 2.136439  | 0.960917  |
| 76 | 1 | 0 | -8.897762 | 1.673657  | -0.004182 |
| 77 | 1 | 0 | -7.484869 | 2.373877  | -0.792340 |
| 78 | 7 | 0 | 3.442297  | 3.785691  | -0.174487 |
| 79 | 7 | 0 | 1.374414  | 4.949540  | -0.187153 |
| 80 | 7 | 0 | -1.400964 | 4.928583  | -0.023760 |
| 81 | 7 | 0 | -3.447387 | 3.738300  | 0.121020  |
| 82 | 1 | 0 | 3.228566  | 5.829024  | -0.223260 |
| 83 | 1 | 0 | -3.258269 | 5.783808  | 0.152300  |

**Table S11.** Atomic coordinates and energies of NG 4.

|                                              |                             |
|----------------------------------------------|-----------------------------|
| Zero-point correction=                       | 0.662325 (Hartree/Particle) |
| Thermal correction to Energy=                | 0.700809                    |
| Thermal correction to Enthalpy=              | 0.701753                    |
| Thermal correction to Gibbs Free Energy=     | 0.593014                    |
| Sum of electronic and zero-point Energies=   | -4391.635447                |
| Sum of electronic and thermal Energies=      | -4391.596964                |
| Sum of electronic and thermal Enthalpies=    | -4391.596020                |
| Sum of electronic and thermal Free Energies= | -4391.704758                |

| Center | Atomic | Atomic | Coordinates (Angstroms) |
|--------|--------|--------|-------------------------|
|--------|--------|--------|-------------------------|

| Number | Number | Type | X         | Y         | Z         |
|--------|--------|------|-----------|-----------|-----------|
| 1      | 6      | 0    | 1.479660  | 0.243662  | -0.220078 |
| 2      | 6      | 0    | 0.773824  | 1.457362  | -0.204749 |
| 3      | 6      | 0    | -0.628215 | 1.464981  | -0.149772 |
| 4      | 6      | 0    | -1.225519 | -2.067646 | 0.934488  |
| 5      | 6      | 0    | 0.831862  | 3.944999  | -0.297730 |
| 6      | 6      | 0    | -1.341424 | 0.260857  | 0.023754  |
| 7      | 6      | 0    | -0.604961 | -0.940655 | 0.168943  |
| 8      | 6      | 0    | 0.774893  | -0.982095 | -0.149231 |
| 9      | 6      | 0    | 1.485609  | 2.704689  | -0.255131 |
| 10     | 6      | 0    | -1.309173 | 2.732575  | -0.147849 |
| 11     | 6      | 0    | 2.923022  | 0.272097  | -0.149915 |
| 12     | 6      | 0    | -0.629394 | 3.959243  | -0.226436 |
| 13     | 6      | 0    | 1.543447  | -2.219387 | -0.391230 |
| 14     | 6      | 0    | 3.649083  | -0.921439 | -0.026241 |
| 15     | 6      | 0    | -2.704819 | 2.804320  | -0.014215 |
| 16     | 6      | 0    | -3.476126 | 1.572126  | 0.041680  |
| 17     | 6      | 0    | 3.626530  | 1.494682  | -0.106231 |
| 18     | 6      | 0    | -2.818120 | 0.329034  | 0.016985  |
| 19     | 6      | 0    | 2.889172  | 2.742712  | -0.233569 |
| 20     | 6      | 0    | 2.822777  | 5.004283  | -0.377419 |
| 21     | 6      | 0    | 4.997788  | 1.514194  | 0.097413  |
| 22     | 1      | 0    | 5.479051  | 2.482162  | 0.122753  |
| 23     | 6      | 0    | -2.587343 | 5.069535  | -0.079334 |
| 24     | 6      | 0    | 2.954705  | -2.189576 | -0.262678 |
| 25     | 6      | 0    | 5.021773  | -0.857230 | 0.227480  |
| 26     | 1      | 0    | 5.564387  | -1.776219 | 0.379540  |
| 27     | 6      | 0    | -1.579080 | -1.831732 | 2.263639  |
| 28     | 1      | 0    | -1.385501 | -0.858555 | 2.698298  |
| 29     | 6      | 0    | 5.719077  | 0.341634  | 0.295625  |
| 30     | 6      | 0    | -5.676515 | 0.535053  | -0.029455 |
| 31     | 6      | 0    | -4.876187 | 1.654964  | 0.040933  |
| 32     | 1      | 0    | -5.297935 | 2.647946  | 0.076550  |
| 33     | 6      | 0    | 0.974572  | -3.419662 | -0.887574 |
| 34     | 6      | 0    | -5.017465 | -0.698784 | -0.136947 |
| 35     | 1      | 0    | -5.592057 | -1.610663 | -0.247164 |
| 36     | 6      | 0    | -3.646571 | -0.799165 | -0.116997 |
| 37     | 1      | 0    | -3.214775 | -1.777594 | -0.228302 |
| 38     | 6      | 0    | 7.223753  | 0.413921  | 0.572901  |
| 39     | 6      | 0    | 3.704266  | -3.349416 | -0.497120 |
| 40     | 1      | 0    | 4.779655  | -3.320128 | -0.405174 |
| 41     | 6      | 0    | -1.469143 | -3.328548 | 0.404378  |
| 42     | 6      | 0    | 3.113142  | -4.521793 | -0.900133 |

|    |    |   |           |           |           |
|----|----|---|-----------|-----------|-----------|
| 43 | 1  | 0 | 3.712236  | -5.405559 | -1.081944 |
| 44 | 6  | 0 | 1.743992  | -4.545799 | -1.120231 |
| 45 | 1  | 0 | 1.266162  | -5.445624 | -1.484052 |
| 46 | 6  | 0 | -2.191939 | -2.818625 | 3.020356  |
| 47 | 1  | 0 | -2.466420 | -2.613472 | 4.047947  |
| 48 | 6  | 0 | -2.082380 | -4.323145 | 1.152755  |
| 49 | 1  | 0 | -2.256191 | -5.297101 | 0.712617  |
| 50 | 6  | 0 | -7.204537 | 0.594027  | -0.025988 |
| 51 | 6  | 0 | -2.457137 | -4.062256 | 2.463287  |
| 52 | 1  | 0 | -2.940454 | -4.833116 | 3.051240  |
| 53 | 6  | 0 | 7.850367  | -0.970528 | 0.765744  |
| 54 | 1  | 0 | 8.918617  | -0.861328 | 0.964090  |
| 55 | 1  | 0 | 7.745433  | -1.593523 | -0.125770 |
| 56 | 1  | 0 | 7.412470  | -1.502325 | 1.613804  |
| 57 | 6  | 0 | 7.463931  | 1.233798  | 1.852179  |
| 58 | 1  | 0 | 6.977858  | 0.767207  | 2.712165  |
| 59 | 1  | 0 | 7.078345  | 2.250311  | 1.760074  |
| 60 | 1  | 0 | 8.534687  | 1.300287  | 2.061620  |
| 61 | 6  | 0 | -7.742963 | -0.007776 | -1.335262 |
| 62 | 1  | 0 | -7.378520 | 0.551433  | -2.199895 |
| 63 | 1  | 0 | -8.835514 | 0.026349  | -1.344068 |
| 64 | 1  | 0 | -7.442299 | -1.049728 | -1.458948 |
| 65 | 6  | 0 | 7.924529  | 1.100035  | -0.612079 |
| 66 | 1  | 0 | 8.999682  | 1.166379  | -0.426505 |
| 67 | 1  | 0 | 7.550966  | 2.112413  | -0.773244 |
| 68 | 1  | 0 | 7.773049  | 0.536041  | -1.535365 |
| 69 | 6  | 0 | -7.738759 | -0.218158 | 1.166226  |
| 70 | 1  | 0 | -7.431668 | -1.264392 | 1.115385  |
| 71 | 1  | 0 | -8.831457 | -0.191440 | 1.181393  |
| 72 | 1  | 0 | -7.375655 | 0.192328  | 2.111215  |
| 73 | 6  | 0 | -7.725778 | 2.028887  | 0.095628  |
| 74 | 1  | 0 | -7.389052 | 2.505803  | 1.018642  |
| 75 | 1  | 0 | -8.817981 | 2.020781  | 0.105652  |
| 76 | 1  | 0 | -7.407450 | 2.649493  | -0.744670 |
| 77 | 7  | 0 | 3.550793  | 3.897215  | -0.296294 |
| 78 | 7  | 0 | 1.502396  | 5.092277  | -0.369818 |
| 79 | 7  | 0 | -1.270822 | 5.124787  | -0.199425 |
| 80 | 7  | 0 | -3.334883 | 3.978635  | 0.021565  |
| 81 | 1  | 0 | 3.370528  | 5.938783  | -0.448310 |
| 82 | 1  | 0 | -3.112321 | 6.019491  | -0.056132 |
| 83 | 34 | 0 | -0.872635 | -3.612305 | -1.387366 |

**Table S12.** Atomic coordinates and energies of NG **1-Me<sup>+</sup>**.

|                                              |                             |
|----------------------------------------------|-----------------------------|
| Zero-point correction=                       | 0.686363 (Hartree/Particle) |
| Thermal correction to Energy=                | 0.724381                    |
| Thermal correction to Enthalpy=              | 0.725325                    |
| Thermal correction to Gibbs Free Energy=     | 0.618746                    |
| Sum of electronic and zero-point Energies=   | -2103.707810                |
| Sum of electronic and thermal Energies=      | -2103.669793                |
| Sum of electronic and thermal Enthalpies=    | -2103.668849                |
| Sum of electronic and thermal Free Energies= | -2103.775427                |

| Center<br>Number | Atomic<br>Number | Atomic<br>Type | Coordinates (Angstroms) |           |           |
|------------------|------------------|----------------|-------------------------|-----------|-----------|
|                  |                  |                | X                       | Y         | Z         |
| 1                | 8                | 0              | -0.083193               | -3.857041 | -1.809915 |
| 2                | 6                | 0              | -7.000681               | 0.266781  | 1.238356  |
| 3                | 6                | 0              | -5.551337               | 0.126036  | 0.767343  |
| 4                | 6                | 0              | -4.903509               | -1.095214 | 0.672011  |
| 5                | 1                | 0              | -5.451197               | -1.984608 | 0.936715  |
| 6                | 6                | 0              | -3.579906               | -1.225368 | 0.233038  |
| 7                | 6                | 0              | -2.845623               | -0.071470 | -0.068004 |
| 8                | 6                | 0              | -1.432519               | -0.158485 | -0.359201 |
| 9                | 6                | 0              | -0.701598               | 1.046792  | -0.452828 |
| 10               | 6                | 0              | 0.689294                | 1.026219  | -0.447010 |
| 11               | 6                | 0              | 1.409312                | 2.262534  | -0.503506 |
| 12               | 6                | 0              | 2.813791                | 2.265949  | -0.327441 |
| 13               | 6                | 0              | 3.492704                | 1.046976  | 0.002891  |
| 14               | 6                | 0              | 4.827459                | 1.085026  | 0.397938  |
| 15               | 1                | 0              | 5.321942                | 2.045895  | 0.410056  |
| 16               | 6                | 0              | 5.497047                | -0.066337 | 0.790703  |
| 17               | 6                | 0              | 6.949084                | 0.018498  | 1.268689  |
| 18               | 6                | 0              | -2.969863               | -2.523408 | -0.031819 |
| 19               | 6                | 0              | -3.729331               | -3.699201 | 0.052880  |
| 20               | 1                | 0              | -4.731995               | -3.666830 | 0.450677  |
| 21               | 6                | 0              | -3.251876               | -4.901345 | -0.413366 |
| 22               | 1                | 0              | -3.863936               | -5.792143 | -0.351608 |
| 23               | 6                | 0              | -2.006736               | -4.948022 | -1.026040 |
| 24               | 1                | 0              | -1.631268               | -5.849176 | -1.492189 |
| 25               | 6                | 0              | -1.243717               | -3.806777 | -1.078160 |
| 26               | 6                | 0              | 1.056932                | -3.850379 | -1.048648 |
| 27               | 6                | 0              | 1.771157                | -5.021661 | -0.965762 |
| 28               | 1                | 0              | 1.368487                | -5.911878 | -1.430261 |
| 29               | 6                | 0              | 3.002700                | -5.021179 | -0.324752 |
| 30               | 1                | 0              | 3.573614                | -5.936803 | -0.237847 |
| 31               | 6                | 0              | 3.522062                | -3.834186 | 0.136316  |
| 32               | 1                | 0              | 4.516830                | -3.839739 | 0.555348  |



|    |   |   |           |           |           |
|----|---|---|-----------|-----------|-----------|
| 33 | 6 | 0 | 2.813436  | -2.630175 | 0.020903  |
| 34 | 6 | 0 | 3.470839  | -1.352528 | 0.268609  |
| 35 | 6 | 0 | 4.794780  | -1.262744 | 0.712728  |
| 36 | 1 | 0 | 5.305295  | -2.169041 | 0.994994  |
| 37 | 6 | 0 | 2.875486  | 4.501186  | -0.693170 |
| 38 | 6 | 0 | 0.758827  | 3.492857  | -0.677043 |
| 39 | 6 | 0 | -0.689939 | 3.524062  | -0.642865 |
| 40 | 6 | 0 | -1.366202 | 2.306852  | -0.476678 |
| 41 | 6 | 0 | -2.767074 | 2.390887  | -0.295681 |
| 42 | 6 | 0 | -2.661084 | 4.641299  | -0.575464 |
| 43 | 6 | 0 | -3.503633 | 1.178231  | 0.009904  |
| 44 | 6 | 0 | -0.774059 | -1.398985 | -0.504529 |
| 45 | 6 | 0 | -1.642468 | -2.584637 | -0.518891 |
| 46 | 6 | 0 | 0.669273  | -1.424247 | -0.489892 |
| 47 | 6 | 0 | 1.374137  | -0.206601 | -0.361476 |
| 48 | 6 | 0 | 2.781018  | -0.176470 | -0.049858 |
| 49 | 6 | 0 | 1.494369  | -2.640832 | -0.491030 |
| 50 | 6 | 0 | -4.829383 | 1.260579  | 0.401636  |
| 51 | 1 | 0 | -5.280702 | 2.242340  | 0.434170  |
| 52 | 6 | 0 | 7.817886  | 0.600918  | 0.140617  |
| 53 | 1 | 0 | 8.857255  | 0.670785  | 0.468563  |
| 54 | 1 | 0 | 7.786122  | -0.033240 | -0.748143 |
| 55 | 1 | 0 | 7.495565  | 1.602948  | -0.148501 |
| 56 | 6 | 0 | 7.513725  | -1.351326 | 1.656762  |
| 57 | 1 | 0 | 7.527197  | -2.043758 | 0.811641  |
| 58 | 1 | 0 | 8.544446  | -1.234715 | 1.995399  |
| 59 | 1 | 0 | 6.953149  | -1.809174 | 2.475317  |
| 60 | 6 | 0 | 7.019484  | 0.938848  | 2.499526  |
| 61 | 1 | 0 | 6.409834  | 0.549240  | 3.317923  |
| 62 | 1 | 0 | 8.050453  | 1.012453  | 2.852188  |
| 63 | 1 | 0 | 6.675430  | 1.949887  | 2.273604  |
| 64 | 6 | 0 | -7.834671 | 0.908764  | 0.116239  |
| 65 | 1 | 0 | -7.825721 | 0.289521  | -0.783547 |
| 66 | 1 | 0 | -8.872012 | 1.020324  | 0.439517  |
| 67 | 1 | 0 | -7.464143 | 1.899391  | -0.152977 |
| 68 | 6 | 0 | -7.629772 | -1.082632 | 1.597547  |
| 69 | 1 | 0 | -8.656727 | -0.925693 | 1.931720  |
| 70 | 1 | 0 | -7.667664 | -1.758144 | 0.739578  |
| 71 | 1 | 0 | -7.095739 | -1.580159 | 2.410679  |
| 72 | 6 | 0 | -7.038498 | 1.166909  | 2.485578  |
| 73 | 1 | 0 | -8.067854 | 1.280904  | 2.832605  |
| 74 | 1 | 0 | -6.453231 | 0.734454  | 3.300329  |
| 75 | 1 | 0 | -6.646498 | 2.164690  | 2.280829  |

|    |   |   |           |          |           |
|----|---|---|-----------|----------|-----------|
| 76 | 1 | 0 | -3.193861 | 5.583906 | -0.642769 |
| 77 | 1 | 0 | 3.440834  | 5.415966 | -0.822188 |
| 78 | 7 | 0 | -3.396585 | 3.556671 | -0.352870 |
| 79 | 7 | 0 | -1.348618 | 4.688957 | -0.704167 |
| 80 | 7 | 0 | 1.536799  | 4.617582 | -0.817878 |
| 81 | 7 | 0 | 3.515595  | 3.405315 | -0.429483 |
| 82 | 6 | 0 | 1.019711  | 5.970934 | -1.126677 |
| 83 | 1 | 0 | 0.379750  | 5.931334 | -2.001372 |
| 84 | 1 | 0 | 0.444481  | 6.355016 | -0.291251 |
| 85 | 1 | 0 | 1.880857  | 6.605139 | -1.321629 |

**Table S13.** Atomic coordinates of NG **HBC-Bu**.

|                                              |                             |
|----------------------------------------------|-----------------------------|
| Zero-point correction=                       | 0.907748 (Hartree/Particle) |
| Thermal correction to Energy=                | 0.954953                    |
| Thermal correction to Enthalpy=              | 0.955897                    |
| Thermal correction to Gibbs Free Energy=     | 0.826396                    |
| Sum of electronic and zero-point Energies=   | -2238.835571                |
| Sum of electronic and thermal Energies=      | -2238.788366                |
| Sum of electronic and thermal Enthalpies=    | -2238.787422                |
| Sum of electronic and thermal Free Energies= | -2238.916923                |

| Center Number | Atomic Number | Atomic Type | Coordinates (Angstroms) |           |           |
|---------------|---------------|-------------|-------------------------|-----------|-----------|
|               |               |             | X                       | Y         | Z         |
| 1             | 6             | 0           | 0.707484                | 0.127511  | -0.000439 |
| 2             | 6             | 0           | 1.397238                | -1.102413 | -0.000336 |
| 3             | 6             | 0           | 0.677129                | -2.317682 | -0.000912 |
| 4             | 6             | 0           | -0.734162               | -2.300310 | -0.001139 |
| 5             | 6             | 0           | -1.423631               | -1.067833 | -0.000393 |
| 6             | 6             | 0           | -0.703266               | 0.144896  | -0.000339 |
| 7             | 6             | 0           | -1.410732               | 1.404649  | 0.000114  |
| 8             | 6             | 0           | -2.867622               | -1.045399 | -0.000387 |
| 9             | 6             | 0           | -1.475327               | -3.542473 | -0.001623 |
| 10            | 6             | 0           | 1.387825                | -3.576747 | -0.001258 |
| 11            | 6             | 0           | 2.841369                | -1.117187 | -0.000128 |
| 12            | 6             | 0           | 1.445486                | 1.370469  | -0.000328 |
| 13            | 6             | 0           | -2.819769               | 1.435650  | 0.000627  |
| 14            | 6             | 0           | -3.477783               | 2.667793  | 0.001270  |
| 15            | 6             | 0           | -2.797790               | 3.872672  | 0.001425  |
| 16            | 6             | 0           | -1.409064               | 3.822529  | 0.000773  |
| 17            | 6             | 0           | -0.700573               | 2.626805  | 0.000008  |
| 18            | 6             | 0           | -3.602970               | -2.251683 | -0.000600 |
| 19            | 6             | 0           | -4.992224               | -2.201315 | 0.000034  |
| 20            | 6             | 0           | -5.698765               | -1.005128 | 0.000973  |

|    |   |   |           |           |           |
|----|---|---|-----------|-----------|-----------|
| 21 | 6 | 0 | -4.964020 | 0.167671  | 0.001184  |
| 22 | 6 | 0 | -3.567453 | 0.178265  | 0.000580  |
| 23 | 6 | 0 | -0.789490 | -4.778624 | -0.002500 |
| 24 | 6 | 0 | -2.903708 | -5.946170 | -0.003605 |
| 25 | 6 | 0 | -2.889883 | -3.529934 | -0.001720 |
| 26 | 6 | 0 | 2.802575  | -3.597672 | -0.000794 |
| 27 | 6 | 0 | 2.758293  | -6.013754 | -0.002524 |
| 28 | 6 | 0 | 0.672480  | -4.796316 | -0.002217 |
| 29 | 6 | 0 | 3.572902  | 0.092477  | 0.000599  |
| 30 | 6 | 0 | 4.962853  | 0.043749  | 0.002180  |
| 31 | 6 | 0 | 5.672574  | -1.150393 | 0.002950  |
| 32 | 6 | 0 | 4.940979  | -2.325303 | 0.001895  |
| 33 | 6 | 0 | 3.545085  | -2.337549 | 0.000422  |
| 34 | 6 | 0 | 0.764915  | 2.609085  | -0.000895 |
| 35 | 6 | 0 | 1.502004  | 3.787762  | -0.002106 |
| 36 | 6 | 0 | 2.891191  | 3.804725  | -0.002825 |
| 37 | 6 | 0 | 3.541874  | 2.583416  | -0.001982 |
| 38 | 6 | 0 | 2.854537  | 1.368111  | -0.000679 |
| 39 | 6 | 0 | -7.231394 | -1.026844 | 0.001722  |
| 40 | 6 | 0 | -7.834950 | 0.381403  | 0.002740  |
| 41 | 6 | 0 | -7.731904 | -1.761709 | 1.257017  |
| 42 | 6 | 0 | -7.733150 | -1.760427 | -1.253826 |
| 43 | 6 | 0 | 7.205169  | -1.125262 | 0.004945  |
| 44 | 6 | 0 | 7.811223  | -2.532473 | 0.005559  |
| 45 | 6 | 0 | 7.703270  | -0.390295 | 1.261130  |
| 46 | 6 | 0 | 7.706578  | -0.389983 | -1.249740 |
| 47 | 6 | 0 | 3.635777  | 5.144504  | -0.004521 |
| 48 | 6 | 0 | 5.157588  | 4.966511  | -0.005172 |
| 49 | 6 | 0 | 3.249554  | 5.946087  | 1.250309  |
| 50 | 6 | 0 | 3.248196  | 5.943658  | -1.260481 |
| 51 | 6 | 0 | -3.509640 | 5.230114  | 0.002288  |
| 52 | 6 | 0 | -5.035315 | 5.089205  | 0.002917  |
| 53 | 6 | 0 | -3.103905 | 6.021325  | -1.252967 |
| 54 | 6 | 0 | -3.102769 | 6.020303  | 1.257817  |
| 55 | 1 | 0 | -4.554366 | 2.685736  | 0.001683  |
| 56 | 1 | 0 | -0.867780 | 4.756018  | 0.000972  |
| 57 | 1 | 0 | -5.552791 | -3.123351 | -0.000100 |
| 58 | 1 | 0 | -5.493797 | 1.105044  | 0.001910  |
| 59 | 1 | 0 | -3.457566 | -6.877161 | -0.004413 |
| 60 | 1 | 0 | 3.289594  | -6.957809 | -0.003091 |
| 61 | 1 | 0 | 5.522364  | 0.966401  | 0.003123  |
| 62 | 1 | 0 | 5.471817  | -3.262120 | 0.002452  |
| 63 | 1 | 0 | 0.983116  | 4.733875  | -0.002759 |

|     |   |   |           |           |           |
|-----|---|---|-----------|-----------|-----------|
| 64  | 1 | 0 | 4.618617  | 2.575103  | -0.002646 |
| 65  | 1 | 0 | -7.543286 | 0.949781  | -0.883431 |
| 66  | 1 | 0 | -8.924843 | 0.310392  | 0.003250  |
| 67  | 1 | 0 | -7.542396 | 0.948882  | 0.889192  |
| 68  | 1 | 0 | -7.376720 | -2.792961 | 1.293514  |
| 69  | 1 | 0 | -8.824838 | -1.785210 | 1.270944  |
| 70  | 1 | 0 | -7.390393 | -1.259147 | 2.164790  |
| 71  | 1 | 0 | -8.826097 | -1.783912 | -1.266696 |
| 72  | 1 | 0 | -7.392535 | -1.256943 | -2.161424 |
| 73  | 1 | 0 | -7.378008 | -2.791642 | -1.291724 |
| 74  | 1 | 0 | 7.521177  | -3.100768 | -0.881198 |
| 75  | 1 | 0 | 8.900991  | -2.459591 | 0.006955  |
| 76  | 1 | 0 | 7.518922  | -3.100974 | 0.891441  |
| 77  | 1 | 0 | 7.346613  | 0.640463  | 1.297549  |
| 78  | 1 | 0 | 8.796156  | -0.365282 | 1.276255  |
| 79  | 1 | 0 | 7.361505  | -0.893802 | 2.168274  |
| 80  | 1 | 0 | 8.799501  | -0.365032 | -1.262013 |
| 81  | 1 | 0 | 7.367146  | -0.893223 | -2.157908 |
| 82  | 1 | 0 | 7.350091  | 0.640810  | -1.286808 |
| 83  | 1 | 0 | 5.503969  | 4.429569  | -0.891263 |
| 84  | 1 | 0 | 5.638892  | 5.946938  | -0.006408 |
| 85  | 1 | 0 | 5.504934  | 4.431333  | 0.881609  |
| 86  | 1 | 0 | 2.178409  | 6.151641  | 1.287910  |
| 87  | 1 | 0 | 3.773426  | 6.905600  | 1.262396  |
| 88  | 1 | 0 | 3.516389  | 5.400769  | 2.158409  |
| 89  | 1 | 0 | 3.772023  | 6.903163  | -1.274973 |
| 90  | 1 | 0 | 3.514089  | 5.396601  | -2.167811 |
| 91  | 1 | 0 | 2.177004  | 6.149100  | -1.297345 |
| 92  | 1 | 0 | -5.394844 | 4.561263  | 0.889145  |
| 93  | 1 | 0 | -5.492590 | 6.081084  | 0.003516  |
| 94  | 1 | 0 | -5.395642 | 4.561967  | -0.883406 |
| 95  | 1 | 0 | -2.028063 | 6.200680  | -1.290691 |
| 96  | 1 | 0 | -3.604238 | 6.993315  | -1.265636 |
| 97  | 1 | 0 | -3.383965 | 5.482141  | -2.160748 |
| 98  | 1 | 0 | -3.603056 | 6.992300  | 1.271709  |
| 99  | 1 | 0 | -3.382047 | 5.480398  | 2.165411  |
| 100 | 1 | 0 | -2.026886 | 6.199586  | 1.294739  |
| 101 | 6 | 0 | -3.578225 | -4.741601 | -0.002711 |
| 102 | 1 | 0 | -4.657605 | -4.760050 | -0.002876 |
| 103 | 6 | 0 | -1.524146 | -5.963776 | -0.003456 |
| 104 | 1 | 0 | -1.023596 | -6.920148 | -0.004139 |
| 105 | 6 | 0 | 1.378394  | -5.998458 | -0.002834 |
| 106 | 1 | 0 | 0.855250  | -6.942660 | -0.003592 |

|     |   |   |          |           |           |
|-----|---|---|----------|-----------|-----------|
| 107 | 6 | 0 | 3.461705 | -4.826172 | -0.001492 |
| 108 | 1 | 0 | 4.540268 | -4.870924 | -0.001332 |

**Table S14.** Atomic coordinates of NG **HBC-O**.

|                                              |                             |
|----------------------------------------------|-----------------------------|
| Zero-point correction=                       | 0.914626 (Hartree/Particle) |
| Thermal correction to Energy=                | 0.963000                    |
| Thermal correction to Enthalpy=              | 0.963944                    |
| Thermal correction to Gibbs Free Energy=     | 0.835689                    |
| Sum of electronic and zero-point Energies=   | -2314.001516                |
| Sum of electronic and thermal Energies=      | -2313.953141                |
| Sum of electronic and thermal Enthalpies=    | -2313.952197                |
| Sum of electronic and thermal Free Energies= | -2314.080452                |

| Center<br>Number | Atomic<br>Number | Atomic<br>Type | Coordinates (Angstroms) |           |           |
|------------------|------------------|----------------|-------------------------|-----------|-----------|
|                  |                  |                | X                       | Y         | Z         |
| 1                | 8                | 0              | 0.000014                | -4.482600 | -2.246598 |
| 2                | 6                | 0              | -6.796701               | -0.953239 | 1.742304  |
| 3                | 6                | 0              | -5.412070               | -1.000007 | 1.087453  |
| 4                | 6                | 0              | -4.761024               | -2.185320 | 0.790064  |
| 5                | 1                | 0              | -5.252161               | -3.119251 | 1.009384  |
| 6                | 6                | 0              | -3.485024               | -2.211018 | 0.221281  |
| 7                | 6                | 0              | -2.803257               | -1.005155 | -0.006940 |
| 8                | 6                | 0              | -1.396471               | -1.013478 | -0.349329 |
| 9                | 6                | 0              | -0.697406               | 0.214954  | -0.307870 |
| 10               | 6                | 0              | 0.697429                | 0.214976  | -0.308217 |
| 11               | 6                | 0              | 1.412895                | 1.465553  | -0.257155 |
| 12               | 6                | 0              | 2.812273                | 1.474347  | -0.091757 |
| 13               | 6                | 0              | 3.483369                | 0.211643  | 0.219964  |
| 14               | 6                | 0              | 4.760181                | 0.187598  | 0.764310  |
| 15               | 1                | 0              | 5.248437                | 1.126858  | 0.982709  |
| 16               | 6                | 0              | 5.412129                | -0.999982 | 1.087335  |
| 17               | 6                | 0              | 6.796787                | -0.953205 | 1.742130  |
| 18               | 6                | 0              | -2.869663               | -3.448566 | -0.249160 |
| 19               | 6                | 0              | -3.618142               | -4.632514 | -0.326009 |
| 20               | 1                | 0              | -4.617844               | -4.662909 | 0.080782  |
| 21               | 6                | 0              | -3.137354               | -5.750080 | -0.967809 |
| 22               | 1                | 0              | -3.740340               | -6.647660 | -1.028328 |
| 23               | 6                | 0              | -1.899418               | -5.692724 | -1.593708 |
| 24               | 1                | 0              | -1.514859               | -6.515283 | -2.182235 |
| 25               | 6                | 0              | -1.152047               | -4.541597 | -1.499982 |
| 26               | 6                | 0              | 1.152052                | -4.541604 | -1.499945 |
| 27               | 6                | 0              | 1.899403                | -5.692746 | -1.593630 |
| 28               | 1                | 0              | 1.514843                | -6.515312 | -2.182145 |

|    |   |   |           |           |           |
|----|---|---|-----------|-----------|-----------|
| 29 | 6 | 0 | 3.137327  | -5.750108 | -0.967706 |
| 30 | 1 | 0 | 3.740296  | -6.647702 | -1.028185 |
| 31 | 6 | 0 | 3.618130  | -4.632528 | -0.325941 |
| 32 | 1 | 0 | 4.617826  | -4.662930 | 0.080862  |
| 33 | 6 | 0 | 2.869676  | -3.448560 | -0.249150 |
| 34 | 6 | 0 | 3.485047  | -2.211004 | 0.221257  |
| 35 | 6 | 0 | 4.761075  | -2.185298 | 0.789974  |
| 36 | 1 | 0 | 5.252227  | -3.119225 | 1.009274  |
| 37 | 6 | 0 | 3.504119  | 2.671885  | -0.200542 |
| 38 | 1 | 0 | 4.582489  | 2.660706  | -0.125274 |
| 39 | 6 | 0 | 2.856278  | 3.884810  | -0.427954 |
| 40 | 6 | 0 | 3.680967  | 5.168892  | -0.570852 |
| 41 | 6 | 0 | 1.473375  | 3.869243  | -0.504620 |
| 42 | 1 | 0 | 0.951310  | 4.801831  | -0.643775 |
| 43 | 6 | 0 | 0.731219  | 2.687734  | -0.410612 |
| 44 | 6 | 0 | -0.731242 | 2.687729  | -0.410587 |
| 45 | 6 | 0 | -1.412914 | 1.465529  | -0.257279 |
| 46 | 6 | 0 | -2.812280 | 1.474326  | -0.091773 |
| 47 | 6 | 0 | -3.504148 | 2.671842  | -0.200647 |
| 48 | 1 | 0 | -4.582519 | 2.660647  | -0.125387 |
| 49 | 6 | 0 | -2.856323 | 3.884769  | -0.428096 |
| 50 | 6 | 0 | -3.681046 | 5.168821  | -0.571086 |
| 51 | 6 | 0 | -1.473416 | 3.869219  | -0.504719 |
| 52 | 1 | 0 | -0.951358 | 4.801807  | -0.643896 |
| 53 | 6 | 0 | -3.483365 | 0.211621  | 0.219969  |
| 54 | 6 | 0 | -0.716066 | -2.217959 | -0.624138 |
| 55 | 6 | 0 | -1.558177 | -3.414681 | -0.772817 |
| 56 | 6 | 0 | 0.716084  | -2.217941 | -0.624216 |
| 57 | 6 | 0 | 1.396454  | -1.013493 | -0.349169 |
| 58 | 6 | 0 | 2.803286  | -1.005140 | -0.006998 |
| 59 | 6 | 0 | 1.558177  | -3.414687 | -0.772778 |
| 60 | 6 | 0 | -4.760146 | 0.187576  | 0.764385  |
| 61 | 1 | 0 | -5.248402 | 1.126837  | 0.982788  |
| 62 | 6 | 0 | 7.778462  | -0.214334 | 0.816717  |
| 63 | 1 | 0 | 7.461654  | 0.812106  | 0.624069  |
| 64 | 1 | 0 | 8.771251  | -0.175499 | 1.272798  |
| 65 | 1 | 0 | 7.865542  | -0.723619 | -0.145729 |
| 66 | 6 | 0 | 6.699231  | -0.206534 | 3.083595  |
| 67 | 1 | 0 | 7.680296  | -0.162121 | 3.564016  |
| 68 | 1 | 0 | 6.345009  | 0.817512  | 2.953748  |
| 69 | 1 | 0 | 6.010273  | -0.714124 | 3.762480  |
| 70 | 6 | 0 | 7.360199  | -2.351551 | 2.014775  |
| 71 | 1 | 0 | 6.721234  | -2.922625 | 2.692137  |

|     |   |   |           |           |           |
|-----|---|---|-----------|-----------|-----------|
| 72  | 1 | 0 | 7.487704  | -2.925429 | 1.093948  |
| 73  | 1 | 0 | 8.341955  | -2.263298 | 2.485150  |
| 74  | 6 | 0 | -4.636537 | 5.026976  | -1.768318 |
| 75  | 1 | 0 | -5.322949 | 4.187869  | -1.643082 |
| 76  | 1 | 0 | -5.235660 | 5.934176  | -1.883700 |
| 77  | 1 | 0 | -4.079488 | 4.866578  | -2.694144 |
| 78  | 6 | 0 | -4.499514 | 5.400799  | 0.710529  |
| 79  | 1 | 0 | -5.090797 | 6.315976  | 0.621031  |
| 80  | 1 | 0 | -5.189415 | 4.578362  | 0.907001  |
| 81  | 1 | 0 | -3.844189 | 5.502344  | 1.578599  |
| 82  | 6 | 0 | -2.804251 | 6.403234  | -0.805013 |
| 83  | 1 | 0 | -2.122279 | 6.582326  | 0.029449  |
| 84  | 1 | 0 | -2.214737 | 6.315641  | -1.720460 |
| 85  | 1 | 0 | -3.438671 | 7.286555  | -0.905771 |
| 86  | 6 | 0 | 4.636495  | 5.027151  | -1.768069 |
| 87  | 1 | 0 | 5.235572  | 5.934387  | -1.883397 |
| 88  | 1 | 0 | 5.322951  | 4.188077  | -1.642858 |
| 89  | 1 | 0 | 4.079475  | 4.866765  | -2.693915 |
| 90  | 6 | 0 | 4.499384  | 5.400844  | 0.710800  |
| 91  | 1 | 0 | 3.844027  | 5.502331  | 1.578853  |
| 92  | 1 | 0 | 5.189306  | 4.578422  | 0.907263  |
| 93  | 1 | 0 | 5.090639  | 6.316044  | 0.621363  |
| 94  | 6 | 0 | 2.804118  | 6.403270  | -0.804745 |
| 95  | 1 | 0 | 2.214624  | 6.315681  | -1.720206 |
| 96  | 1 | 0 | 2.122120  | 6.582293  | 0.029711  |
| 97  | 1 | 0 | 3.438497  | 7.286626  | -0.905455 |
| 98  | 6 | 0 | -7.778417 | -0.214379 | 0.816922  |
| 99  | 1 | 0 | -8.771191 | -0.175556 | 1.273036  |
| 100 | 1 | 0 | -7.461629 | 0.812068  | 0.624273  |
| 101 | 1 | 0 | -7.865519 | -0.723661 | -0.145522 |
| 102 | 6 | 0 | -7.360086 | -2.351592 | 2.014965  |
| 103 | 1 | 0 | -7.487638 | -2.925462 | 1.094140  |
| 104 | 1 | 0 | -6.721078 | -2.922669 | 2.692285  |
| 105 | 1 | 0 | -8.341816 | -2.263352 | 2.485397  |
| 106 | 6 | 0 | -6.699109 | -0.206567 | 3.083764  |
| 107 | 1 | 0 | -6.010121 | -0.714149 | 3.762626  |
| 108 | 1 | 0 | -6.344905 | 0.817482  | 2.953908  |
| 109 | 1 | 0 | -7.680158 | -0.162172 | 3.564220  |
